# Supplementary material for: Characterizing Long COVID: Deep Phenotype of a Complex Condition
Source: bioRxiv or medRxiv preprint supplement (doi:10.1101/2021.06.23.21259416), 2021-06-29
Supplement: Supplementary file [file media-2.pdf]

SupplementalFile2

| HPO_label | HPO_id     | description_original                                                                                     | PMID          | first.author       | year | cohort                                                 | counts    | percentage |
|-----------|------------|----------------------------------------------------------------------------------------------------------|---------------|--------------------|------|--------------------------------------------------------|-----------|------------|
| Dyspnea   | HP:0002094 | Breathlessness                                                                                           | PMID:33273026 | Arnold             | 2020 | Inpatient (ICU); mean of 84.0 days post discharge      | 10/18/21  | 56.60%     |
| Dyspnea   | HP:0002094 | Breathlessness                                                                                           | PMID:33273026 | Arnold             | 2020 | Inpatient (non-ICU); mean of 84.0 days post discharge  | 26/65     | 40.00%     |
| Dyspnea   | HP:0002094 | Breathlessness                                                                                           | PMID:33273026 | Arnold             | 2020 | Inpatient (non-ICU); mean of 84.0 days post discharge  | 07/27/21  | 25.90%     |
| Dyspnea   | HP:0002094 | Dyspnea at follow up                                                                                     | PMID:33502487 | Bellan             | 2021 | Inpatient; mean of 105.0 days post discharge           | 13/238    | 5.50%      |
| Dyspnea   | HP:0002094 | Dyspnea                                                                                                  | PMID:33502487 | Bellan             | 2021 | Inpatient; mean of 105.0 days post discharge           | 13/238    | 5.50%      |
| Dyspnea   | HP:0002094 | Dyspnea                                                                                                  | PMID:32644129 | Carfi              | 2020 | Inpatient; mean of 60.3 days post discharge            | 62/143    | 43.40%     |
| Dyspnea   | HP:0002094 | Dyspnoea/shortness of breath                                                                             | PMID:33031948 | Carvalho-Schneider | 2021 | Mixed; mean of 60.0 days post diagnosis                | 10/130    | 7.70%      |
| Dyspnea   | HP:0002094 | Dyspnoea/shortness of breath                                                                             | PMID:33031948 | Carvalho-Schneider | 2021 | Mixed; mean of 30.0 days post diagnosis                | 16/150    | 10.70%     |
| Dyspnea   | HP:0002094 | Forty-one patients (36%) had an MRC breathlessness score above their pre-admission baseline at follow-up | PMID:33731329 | Cheng              | 2021 | Mixed; mean of 63.0 days post diagnosis                | 41/113    | 36.30%     |
| Dyspnea   | HP:0002094 | Shortness of breath/chest tightness/wheezing                                                             | PMID:33175566 | Chopra             | 2020 | Inpatient; mean of 60.0 days post discharge            | 81/488    | 16.60%     |
| Dyspnea   | HP:0002094 | dyspnea (69%)                                                                                            | PMID:33564789 | Chun               | 2021 | Mixed; mean of 63.0 days post diagnosis                | 42/61     | 68.90%     |
| Dyspnea   | HP:0002094 | Dyspnea                                                                                                  | PMID:33120193 | Daher              | 2020 | Inpatient (ICU); mean of 56.0 days post discharge      | 11/33     | 33.30%     |
| Dyspnea   | HP:0002094 | shortness of breath (15)                                                                                 | PMID:33657671 | Darley             | 2021 | Mixed; mean of 69.0 days post diagnosis                | 15/78     | 19.20%     |
| Dyspnea   | HP:0002094 | Shortness of Breath                                                                                      | PMID:-1       | Davis              | 2020 | Mixed; mean of 114.5 days post diagnosis               | 2913/3762 | 77.40%     |
| Dyspnea   | HP:0002094 | Mild dyspnoea - very severe dyspnoea                                                                     | PMID:33052920 | De Lorenzo         | 2020 | Inpatient; mean of 21.5 days post discharge            | 40/126    | 31.70%     |
| Dyspnea   | HP:0002094 | Mild dyspnoea - very severe dyspnoea                                                                     | PMID:33052920 | De Lorenzo         | 2020 | Outpatient; mean of 26.0 days post diagnosis           | 18/59     | 30.50%     |
| Dyspnea   | HP:0002094 | Shortness of breath                                                                                      | PMID:33785495 | Dennis             | 2021 | Inpatient; mean of 138.0 days post discharge           | 35/37     | 94.60%     |
| Dyspnea   | HP:0002094 | Shortness of breath                                                                                      | PMID:33785495 | Dennis             | 2021 | Outpatient; mean of 141.0 days post diagnosis          | 141/163   | 86.50%     |
| Dyspnea   | HP:0002094 | Dyspnoea                                                                                                 | PMID:32853602 | Garrigues          | 2020 | Inpatient (non-ICU); mean of 110.9 days post discharge | 38/96     | 39.60%     |
| Dyspnea   | HP:0002094 | Dyspnoea                                                                                                 | PMID:32853602 | Garrigues          | 2020 | Inpatient (ICU); mean of 110.9 days post discharge     | 12/24/21  | 50.00%     |
| Dyspnea   | HP:0002094 | Dyspnoea (71%)                                                                                           | PMID:33257910 | Goertz             | 2020 | Mixed; mean of 79.0 days post diagnosis                | 1500/2113 | 71.00%     |
| Dyspnea   | HP:0002094 | Dyspnea (1,2,3)                                                                                          | PMID:33676998 | González           | 2021 | Inpatient (ICU); mean of 90.0 days post discharge      | 28/62     | 45.20%     |
| Dyspnea   | HP:0002094 | Shortness of breath                                                                                      | PMID:33755344 | Graham             | 2021 | Outpatient; mean of 141.0 days post diagnosis          | 46/100    | 46.00%     |
| Dyspnea   | HP:0002094 | Any new or worsened breathlessness                                                                       | PMID:32729939 | Halpin             | 2021 | Inpatient (ICU); mean of 48.0 days post discharge      | 21/32     | 65.60%     |
| Dyspnea   | HP:0002094 | Any new or worsened breathlessness                                                                       | PMID:32729939 | Halpin             | 2021 | Inpatient (non-ICU); mean of 48.0 days post discharge  | 29/68     | 42.60%     |
| Dyspnea   | HP:0002094 | Dyspnea                                                                                                  | PMID:33825846 | Havervall          | 2021 | Outpatient; mean of 120.0 days post diagnosis          | 11/323    | 3.40%      |
| Dyspnea   | HP:0002094 | Dyspnea                                                                                                  | PMID:33825846 | Havervall          | 2021 | Outpatient; mean of 60.0 days post diagnosis           | 14/323    | 4.30%      |
| Dyspnea   | HP:0002094 | Dyspnea                                                                                                  | PMID:33825846 | Havervall          | 2021 | Outpatient; mean of 240.0 days post diagnosis          | 6/323     | 1.90%      |
| Dyspnea   | HP:0002094 | Dyspnea                                                                                                  | PMID:33680620 | Iqbal              | 2021 | Mixed; mean of 38.1 days post diagnosis                | 79/158    | 50.00%     |
| Dyspnea   | HP:0002094 | Shortness of breath                                                                                      | PMID:33306721 | Jacobs             | 2020 | Inpatient (non-ICU); mean of 35.0 days post discharge  | 58/183    | 31.70%     |
| Dyspnea   | HP:0002094 | Dyspnea                                                                                                  | PMID:33624010 | Jacobson           | 2021 | Inpatient; mean of 119.3 days post discharge           | 11/22/21  | 50.00%     |
| Dyspnea   | HP:0002094 | Dyspnea                                                                                                  | PMID:33624010 | Jacobson           | 2021 | Outpatient; mean of 119.3 days post diagnosis          | 20/96     | 20.80%     |
| Dyspnea   | HP:0002094 | Dyspnea                                                                                                  | PMID:33289374 | Liang              | 2020 | Inpatient (non-ICU); mean of 90.0 days post discharge  | 46/76     | 60.50%     |
| Dyspnea   | HP:0002094 | Trouble breathing                                                                                        | PMID:33606031 | Logue              | 2021 | Inpatient; mean of 169.0 days post discharge           | 01/16/21  | 6.30%      |
| Dyspnea   | HP:0002094 | Trouble breathing                                                                                        | PMID:33606031 | Logue              | 2021 | Outpatient; mean of 169.0 days post diagnosis          | 10/161    | 6.20%      |
| Dyspnea   | HP:0002094 | dyspnoea                                                                                                 | PMID:33205450 | Ludvigsson         | 2021 | Outpatient; mean of 210.0 days post diagnosis          | 05/05/21  | 100.00%    |
| Dyspnea   | HP:0002094 | 53% reported persistent breathlessness                                                                   | PMID:33172844 | Mandal             | 2020 | Inpatient; mean of 54.0 days post discharge            | 204/384   | 53.10%     |
| Dyspnea   | HP:0002094 | Dyspnea                                                                                                  | PMID:33450302 | Moreno-Perez       | 2021 | Mixed; mean of 77.0 days post diagnosis                | 95/277    | 34.30%     |
| Dyspnea   | HP:0002094 | Dyspnea                                                                                                  | PMID:33865161 | Ordinola Navarro   | 2021 | Mixed; mean of 40.0 days post diagnosis                | 36/115    | 31.30%     |
| Dyspnea   | HP:0002094 | Dyspnea (Figure 1)                                                                                       | PMID:33252665 | Petersen           | 2020 | Outpatient; mean of 99.0 days post diagnosis           | 14/180    | 7.80%      |
| Dyspnea   | HP:0002094 | disnea 18%                                                                                               | PMID:33787016 | Prieto             | 2021 | Mixed; mean of 53.0 days post diagnosis                | 15/85     | 17.60%     |
| Dyspnea   | HP:0002094 | ongoing shortness of breath                                                                              | PMID:32730619 | Puntmann           | 2020 | Mixed; mean of 71.0 days post diagnosis                | 36/100    | 36.00%     |
| Dyspnea   | HP:0002094 | Dyspnoea                                                                                                 | PMID:33490928 | Ramani             | 2021 | Inpatient; mean of 48.0 days post discharge            | 36/56     | 64.30%     |
| Dyspnea   | HP:0002094 | dyspnoea (31.4%)                                                                                         | PMID:33521308 | Rosales-Castillo   | 2021 | Inpatient; mean of 50.8 days post discharge            | 37/118    | 31.40%     |
| Dyspnea   | HP:0002094 | Dyspnea                                                                                                  | PMID:33303539 | Sonnweber          | 2020 | Mixed; mean of 103.0 days post diagnosis               | 52/145    | 35.90%     |
| Dyspnea   | HP:0002094 | Dyspnoea                                                                                                 | PMID:33273028 | Stavem             | 2020 | Outpatient; mean of 117.0 days post diagnosis          | 72/451    | 16.00%     |
| Dyspnea   | HP:0002094 | Dyspnea                                                                                                  | PMID:33654513 | Suárez-Robles      | 2020 | Inpatient; mean of 90.0 days post discharge            | 54/134    | 40.30%     |
| Dyspnea   | HP:0002094 | Dyspnea                                                                                                  | PMID:32730238 | Tenforde           | 2020 | Outpatient; mean of 17.5 days post diagnosis           | 79/274    | 28.80%     |
| Dyspnea   | HP:0002094 | dyspnoea                                                                                                 | PMID:33479105 | Trinkmann          | 2021 | Mixed; mean of 68.0 days post diagnosis                | 79/246    | 32.10%     |
| Dyspnea   | HP:0002094 | Dyspnoea                                                                                                 | PMID:33461632 | Venturelli         | 2021 | Mixed; mean of 81.0 days post diagnosis                | 167/515   | 32.40%     |
| Dyspnea   | HP:0002094 | 113 (74.3%) participants reported some shortness of breath                                               | PMID:33443703 | Weerahandi         | 2021 | Inpatient; mean of 37.0 days post discharge            | 113/152   | 74.30%     |
| Dyspnea   | HP:0002094 | dyspnoea (50%)                                                                                           | PMID:33008936 | Wong               | 2020 | Inpatient; mean of 91.0 days post discharge            | 39/78     | 50.00%     |
| Dyspnea   | HP:0002094 | Dyspnea                                                                                                  | PMID:33729425 | Writing Committee  | 2021 | Inpatient (ICU); mean of 93.0 days post discharge      | 25/73     | 34.20%     |
| Dyspnea   | HP:0002094 | Dyspnea                                                                                                  | PMID:33729425 | Writing Committee  | 2021 | Inpatient (non-ICU); mean of 121.0 days post discharge | 53/405    | 13.10%     |
| Dyspnea   | HP:0002094 | Dyspnea                                                                                                  | PMID:33532720 | de Graaf           | 2021 | Inpatient (ICU); mean of 42.0 days post discharge      | 23/34     | 67.60%     |
| Dyspnea   | HP:0002094 | Dyspnea                                                                                                  | PMID:33532720 | de Graaf           | 2021 | Inpatient (non-ICU); mean of 42.0 days post discharge  | 23/47     | 48.90%     |
| Fatigue   | HP:0012378 | Fatigue                                                                                                  | PMID:33872135 | Abdallah           | 2021 | Inpatient; mean of 102.3 days post discharge           | 18/25     | 72.00%     |
| Fatigue   | HP:0012378 | Fatigue                                                                                                  | PMID:33872135 | Abdallah           | 2021 | Outpatient; mean of 129.8 days post diagnosis          | 37/38     | 97.40%     |
| Fatigue   | HP:0012378 | Excessive Fatigue                                                                                        | PMID:33273026 | Arnold             | 2020 | Inpatient (ICU); mean of 84.0 days post discharge      | 10/18/21  | 56.60%     |
| Fatigue   | HP:0012378 | Excessive Fatigue                                                                                        | PMID:33273026 | Arnold             | 2020 | Inpatient (non-ICU); mean of 84.0 days post discharge  | 26/65     | 40.00%     |

## SupplementalFile2

|         |            |                                                                                   |                |                    |      |                                                        |           |         |
|---------|------------|-----------------------------------------------------------------------------------|----------------|--------------------|------|--------------------------------------------------------|-----------|---------|
| Fatigue | HP:0012378 | Excessive Fatigue                                                                 | PMID:33273026  | Arnold             | 2020 | Inpatient (non-ICU); mean of 84.0 days post discharge  | 07/27/21  | 25.90%  |
| Fatigue | HP:0012378 | Fatigue                                                                           | PMID:32644129  | Carfi              | 2020 | Inpatient; mean of 60.3 days post discharge            | 76/143    | 53.10%  |
| Fatigue | HP:0012378 | fatigue                                                                           | PMID:33731329  | Cheng              | 2021 | Mixed; mean of 63.0 days post diagnosis                | 69/113    | 61.10%  |
| Fatigue | HP:0012378 | fatigue (29%)                                                                     | PMID:33564789  | Chun               | 2021 | Mixed; mean of 63.0 days post diagnosis                | 18/61     | 29.50%  |
| Fatigue | HP:0012378 | Fatigue                                                                           | PMID:33120193  | Daher              | 2020 | Inpatient (ICU); mean of 56.0 days post discharge      | 15/33     | 45.50%  |
| Fatigue | HP:0012378 | fatigue (17 patients)                                                             | PMID:336657671 | Darley             | 2021 | Mixed; mean of 69.0 days post diagnosis                | 17/78     | 21.80%  |
| Fatigue | HP:0012378 | Fatigue                                                                           | PMID:-1        | Davis              | 2020 | Mixed; mean of 114.5 days post diagnosis               | 3699/3762 | 98.30%  |
| Fatigue | HP:0012378 | Fatigue                                                                           | PMID:33785495  | Dennis             | 2021 | Inpatient; mean of 138.0 days post discharge           | 37/37     | 100.00% |
| Fatigue | HP:0012378 | Fatigue                                                                           | PMID:33785495  | Dennis             | 2021 | Outpatient; mean of 141.0 days post diagnosis          | 159/163   | 97.50%  |
| Fatigue | HP:0012378 | Fatigue                                                                           | PMID:32853602  | Garrigues          | 2020 | Inpatient (non-ICU); mean of 110.9 days post discharge | 52/96     | 54.20%  |
| Fatigue | HP:0012378 | Fatigue                                                                           | PMID:32853602  | Garrigues          | 2020 | Inpatient (ICU); mean of 110.9 days post discharge     | 14/24     | 58.30%  |
| Fatigue | HP:0012378 | Fatigue (87%)                                                                     | PMID:33257910  | Goertz             | 2020 | Mixed; mean of 79.0 days post diagnosis                | 1838/2113 | 87.00%  |
| Fatigue | HP:0012378 | Muscular fatigue                                                                  | PMID:33676998  | González           | 2021 | Inpatient (ICU); mean of 90.0 days post discharge      | 18/62     | 29.00%  |
| Fatigue | HP:0012378 | Fatigue                                                                           | PMID:33755344  | Graham             | 2021 | Outpatient; mean of 141.0 days post diagnosis          | 85/100    | 85.00%  |
| Fatigue | HP:0012378 | Any new fatigue                                                                   | PMID:32729939  | Halpin             | 2021 | Inpatient (ICU); mean of 48.0 days post discharge      | 23/32     | 71.90%  |
| Fatigue | HP:0012378 | Any new fatigue                                                                   | PMID:32729939  | Halpin             | 2021 | Inpatient (non-ICU); mean of 48.0 days post discharge  | 41/68     | 60.30%  |
| Fatigue | HP:0012378 | Fatigue                                                                           | PMID:33825846  | Havervall          | 2021 | Outpatient; mean of 120.0 days post diagnosis          | 22/323    | 6.80%   |
| Fatigue | HP:0012378 | Fatigue                                                                           | PMID:33825846  | Havervall          | 2021 | Outpatient; mean of 60.0 days post diagnosis           | 27/323    | 8.40%   |
| Fatigue | HP:0012378 | Fatigue                                                                           | PMID:33825846  | Havervall          | 2021 | Outpatient; mean of 240.0 days post diagnosis          | 13/323    | 4.00%   |
| Fatigue | HP:0012378 | Fatigue or muscle weakness                                                        | PMID:33428867  | Huang              | 2021 | Inpatient; mean of 186.0 days post discharge           | 1038/1655 | 62.70%  |
| Fatigue | HP:0012378 | Fatigue                                                                           | PMID:33680620  | Iqbal              | 2021 | Mixed; mean of 38.1 days post diagnosis                | 131/158   | 82.90%  |
| Fatigue | HP:0012378 | Fatigue                                                                           | PMID:33306721  | Jacobs             | 2020 | Inpatient (non-ICU); mean of 35.0 days post discharge  | 82/183    | 44.80%  |
| Fatigue | HP:0012378 | Fatigue                                                                           | PMID:33624010  | Jacobson           | 2021 | Inpatient; mean of 119.3 days post discharge           | 08/22/21  | 36.40%  |
| Fatigue | HP:0012378 | Fatigue                                                                           | PMID:33624010  | Jacobson           | 2021 | Outpatient; mean of 119.3 days post diagnosis          | 28/96     | 29.20%  |
| Fatigue | HP:0012378 | Fatigue                                                                           | PMID:33289374  | Liang              | 2020 | Inpatient (non-ICU); mean of 90.0 days post discharge  | 45/76     | 59.20%  |
| Fatigue | HP:0012378 | Fatigue                                                                           | PMID:33606031  | Logue              | 2021 | Inpatient; mean of 169.0 days post discharge           | 04/16/21  | 25.00%  |
| Fatigue | HP:0012378 | Fatigue                                                                           | PMID:33606031  | Logue              | 2021 | Outpatient; mean of 169.0 days post diagnosis          | 20/161    | 12.40%  |
| Fatigue | HP:0012378 | fatigue                                                                           | PMID:33205450  | Ludvigsson         | 2021 | Outpatient; mean of 210.0 days post diagnosis          | 05/05/21  | 100.00% |
| Fatigue | HP:0012378 | at early follow-up, 69% had persistent fatigue                                    | PMID:33172844  | Mandal             | 2020 | Inpatient; mean of 54.0 days post discharge            | 265/384   | 69.00%  |
| Fatigue | HP:0012378 | Fatigue                                                                           | PMID:33450302  | Moreno-Perez       | 2021 | Mixed; mean of 77.0 days post diagnosis                | 96/277    | 34.70%  |
| Fatigue | HP:0012378 | Fatigue                                                                           | PMID:33865161  | Ordinola Navarro   | 2021 | Mixed; mean of 40.0 days post diagnosis                | 18/115    | 15.70%  |
| Fatigue | HP:0012378 | Fatigue (Figure 1)                                                                | PMID:33252665  | Petersen           | 2020 | Outpatient; mean of 99.0 days post diagnosis           | 50/180    | 27.80%  |
| Fatigue | HP:0012378 | la fatiga (49%)                                                                   | PMID:33787016  | Prieto             | 2021 | Mixed; mean of 53.0 days post diagnosis                | 42/85     | 49.40%  |
| Fatigue | HP:0012378 | general exhaustion                                                                | PMID:32730619  | Puntmann           | 2020 | Mixed; mean of 71.0 days post diagnosis                | 36/100    | 36.00%  |
| Fatigue | HP:0012378 | Fatigue                                                                           | PMID:33490928  | Ramani             | 2021 | Inpatient; mean of 48.0 days post discharge            | 30/55     | 54.50%  |
| Fatigue | HP:0012378 | General malaise                                                                   | PMID:33654513  | Suárez-Robles      | 2020 | Inpatient; mean of 90.0 days post discharge            | 25/134    | 18.70%  |
| Fatigue | HP:0012378 | Fatigue                                                                           | PMID:32730238  | Tenforde           | 2020 | Outpatient; mean of 17.5 days post diagnosis           | 101/274   | 36.90%  |
| Fatigue | HP:0012378 | Based on the CFQ-11 case definition, 52.3% (67/128) met the criteria for fatigue  | PMID:33166287  | Townsend           | 2020 | Mixed; mean of 72.0 days post diagnosis                | 67/128    | 52.30%  |
| Fatigue | HP:0012378 | Seventy-seven patients (51%) met the case definition for fatigue                  | PMID:33587810  | Townsend           | 2021 | Mixed; mean of 80.5 days post diagnosis                | 77/150    | 51.30%  |
| Fatigue | HP:0012378 | fatigue                                                                           | PMID:33479105  | Trinkmann          | 2021 | Mixed; mean of 68.0 days post diagnosis                | 2/246     | 0.80%   |
| Fatigue | HP:0012378 | Fatigue                                                                           | PMID:33729425  | Writing Committee  | 2021 | Inpatient (ICU); mean of 93.0 days post discharge      | 24/63     | 38.10%  |
| Fatigue | HP:0012378 | Fatigue                                                                           | PMID:33729425  | Writing Committee  | 2021 | Inpatient (non-ICU); mean of 121.0 days post discharge | 110/368   | 29.90%  |
| Fatigue | HP:0012378 | Physical decline/fatigue                                                          | PMID:32979574  | Xiong              | 2021 | Inpatient; mean of 97.0 days post discharge            | 152/538   | 28.30%  |
| Fatigue | HP:0012378 | fatigue (16.36%)                                                                  | PMID:32838236  | Zhao               | 2020 | Inpatient; mean of 78.5 days post discharge            | 9/55      | 16.40%  |
| Anosmia | HP:0000458 | Anosmia                                                                           | PMID:33273026  | Arnold             | 2020 | Inpatient (ICU); mean of 84.0 days post discharge      | 04/18/21  | 22.20%  |
| Anosmia | HP:0000458 | Anosmia                                                                           | PMID:33273026  | Arnold             | 2020 | Inpatient (non-ICU); mean of 84.0 days post discharge  | 6/65      | 9.20%   |
| Anosmia | HP:0000458 | Anosmia                                                                           | PMID:33273026  | Arnold             | 2020 | Inpatient (non-ICU); mean of 84.0 days post discharge  | 03/27/21  | 11.10%  |
| Anosmia | HP:0000458 | Anosmia At follow-up                                                              | PMID:33502487  | Bellan             | 2021 | Inpatient; mean of 105.0 days post discharge           | 11/238    | 4.60%   |
| Anosmia | HP:0000458 | Anosmia                                                                           | PMID:33502487  | Bellan             | 2021 | Inpatient; mean of 105.0 days post discharge           | 11/238    | 4.60%   |
| Anosmia | HP:0000458 | Anosmia                                                                           | PMID:32644129  | Carfi              | 2020 | Inpatient; mean of 60.3 days post discharge            | 23/143    | 16.10%  |
| Anosmia | HP:0000458 | Anosmia/ageusia                                                                   | PMID:33031948  | Carvalho-Schneider | 2021 | Mixed; mean of 60.0 days post diagnosis                | 29/130    | 22.30%  |
| Anosmia | HP:0000458 | Anosmia/ageusia                                                                   | PMID:33031948  | Carvalho-Schneider | 2021 | Mixed; mean of 30.0 days post diagnosis                | 40/150    | 26.70%  |
| Anosmia | HP:0000458 | Continued loss of taste and/or smell                                              | PMID:33175566  | Chopra             | 2020 | Inpatient; mean of 60.0 days post discharge            | 64/488    | 13.10%  |
| Anosmia | HP:0000458 | Anosmia                                                                           | PMID:33564789  | Chun               | 2021 | Mixed; mean of 63.0 days post diagnosis                | 10/61     | 16.40%  |
| Anosmia | HP:0000458 | Loss of Smell                                                                     | PMID:33120193  | Daher              | 2020 | Inpatient (ICU); mean of 56.0 days post discharge      | 4/33      | 12.10%  |
| Anosmia | HP:0000458 | Impaired olfaction was evident in 18 patients, including four with severe anosmia | PMID:33657671  | Darley             | 2021 | Mixed; mean of 69.0 days post diagnosis                | 18/78     | 23.10%  |
| Anosmia | HP:0000458 | Loss of smell                                                                     | PMID:-1        | Davis              | 2020 | Mixed; mean of 114.5 days post diagnosis               | 1352/3762 | 35.90%  |
| Anosmia | HP:0000458 | Anosmia                                                                           | PMID:32853602  | Garrigues          | 2020 | Inpatient (non-ICU); mean of 110.9 days post discharge | 14/96     | 14.60%  |
| Anosmia | HP:0000458 | Anosmia                                                                           | PMID:32853602  | Garrigues          | 2020 | Inpatient (ICU); mean of 110.9 days post discharge     | 02/24/21  | 8.30%   |
| Anosmia | HP:0000458 | Anosmia (13%)                                                                     | PMID:33257910  | Goertz             | 2020 | Mixed; mean of 79.0 days post diagnosis                | 275/2113  | 13.00%  |

## SupplementalFile2

|          |            |                                                      |               |                    |      |                                                        |           |        |
|----------|------------|------------------------------------------------------|---------------|--------------------|------|--------------------------------------------------------|-----------|--------|
| Anosmia  | HP:0000458 | Anosmia                                              | PMID:33755344 | Graham             | 2021 | Outpatient; mean of 141.0 days post diagnosis          | 55/100    | 55.00% |
| Anosmia  | HP:0000458 | Anosmia                                              | PMID:33825846 | Havervall          | 2021 | Outpatient; mean of 120.0 days post diagnosis          | 35/323    | 10.80% |
| Anosmia  | HP:0000458 | Anosmia                                              | PMID:33825846 | Havervall          | 2021 | Outpatient; mean of 60.0 days post diagnosis           | 47/323    | 14.60% |
| Anosmia  | HP:0000458 | Anosmia                                              | PMID:33825846 | Havervall          | 2021 | Outpatient; mean of 240.0 days post diagnosis          | 29/323    | 9.00%  |
| Anosmia  | HP:0000458 | Smell disorder                                       | PMID:33428867 | Huang              | 2021 | Inpatient; mean of 186.0 days post discharge           | 176/1655  | 10.60% |
| Anosmia  | HP:0000458 | Loss of smell and taste                              | PMID:33680620 | Iqbal              | 2021 | Mixed; mean of 38.1 days post diagnosis                | 75/158    | 47.50% |
| Anosmia  | HP:0000458 | Lack of smell                                        | PMID:33306721 | Jacobs             | 2020 | Inpatient (non-ICU); mean of 35.0 days post discharge  | 17/183    | 9.30%  |
| Anosmia  | HP:0000458 | Loss of taste/smell                                  | PMID:33624010 | Jacobson           | 2021 | Inpatient; mean of 119.3 days post discharge           | 02/22/21  | 9.10%  |
| Anosmia  | HP:0000458 | Loss of taste/smell                                  | PMID:33624010 | Jacobson           | 2021 | Outpatient; mean of 119.3 days post diagnosis          | 23/96     | 24.00% |
| Anosmia  | HP:0000458 | Loss of sense of taste or smell                      | PMID:33606031 | Logue              | 2021 | Inpatient; mean of 169.0 days post discharge           | 02/16/21  | 12.50% |
| Anosmia  | HP:0000458 | Loss of sense of taste or smell                      | PMID:33606031 | Logue              | 2021 | Outpatient; mean of 169.0 days post diagnosis          | 21/161    | 13.00% |
| Anosmia  | HP:0000458 | deranged smell and taste                             | PMID:33205450 | Ludvigsson         | 2021 | Outpatient; mean of 210.0 days post diagnosis          | 01/05/21  | 20.00% |
| Anosmia  | HP:0000458 | Anosmia-dysgeusia                                    | PMID:33450302 | Moreno-Perez       | 2021 | Mixed; mean of 77.0 days post diagnosis                | 59/277    | 21.30% |
| Anosmia  | HP:0000458 | Loss of smell (Figure 1)                             | PMID:33252665 | Petersen           | 2020 | Outpatient; mean of 99.0 days post diagnosis           | 41/180    | 22.80% |
| Anosmia  | HP:0000458 | Anosmia 22%                                          | PMID:33787016 | Prieto             | 2021 | Mixed; mean of 53.0 days post diagnosis                | 19/85     | 22.40% |
| Anosmia  | HP:0000458 | Anosmia, self-reported                               | PMID:33682276 | Rass               | 2021 | Outpatient; mean of 90.0 days post diagnosis           | 0/32      | 0.00%  |
| Anosmia  | HP:0000458 | Anosmia, self-reported                               | PMID:33682276 | Rass               | 2021 | Inpatient (non-ICU); mean of 90.0 days post discharge  | 2/72      | 2.80%  |
| Anosmia  | HP:0000458 | Anosmia, self-reported                               | PMID:33682276 | Rass               | 2021 | Inpatient (ICU); mean of 90.0 days post discharge      | 0/31      | 0.00%  |
| Anosmia  | HP:0000458 | anosmia (1.7%)                                       | PMID:33521308 | Rosales-Castillo   | 2021 | Inpatient; mean of 50.8 days post discharge            | 2/118     | 1.70%  |
| Anosmia  | HP:0000458 | Hyposmia/.anosmia                                    | PMID:33303539 | Sonnweber          | 2020 | Mixed; mean of 103.0 days post diagnosis               | 28/145    | 19.30% |
| Anosmia  | HP:0000458 | Loss/disturbance of smell                            | PMID:33273028 | Stavem             | 2020 | Outpatient; mean of 117.0 days post diagnosis          | 54/451    | 12.00% |
| Anosmia  | HP:0000458 | Anosmia                                              | PMID:33654513 | Suárez-Robles      | 2020 | Inpatient; mean of 90.0 days post discharge            | 35/134    | 26.10% |
| Anosmia  | HP:0000458 | Anosmia                                              | PMID:33413976 | Taboada            | 2021 | Inpatient (ICU); mean of 180.0 days post discharge     | 10/91     | 11.00% |
| Anosmia  | HP:0000458 | Loss of smell                                        | PMID:32730238 | Tenforde           | 2020 | Outpatient; mean of 17.5 days post diagnosis           | 60/274    | 21.90% |
| Anosmia  | HP:0000458 | Olfactory loss                                       | PMID:33479105 | Trinkmann          | 2021 | Mixed; mean of 68.0 days post diagnosis                | 10/246    | 4.10%  |
| Anosmia  | HP:0000458 | Anosmia/Dysgeusia                                    | PMID:33461632 | Venturelli         | 2021 | Mixed; mean of 81.0 days post diagnosis                | 23/515    | 4.50%  |
| Anosmia  | HP:0000458 | Anosmia                                              | PMID:33729425 | Writing Committee  | 2021 | Inpatient (ICU); mean of 93.0 days post discharge      | 6/62      | 9.70%  |
| Anosmia  | HP:0000458 | Anosmia                                              | PMID:33729425 | Writing Committee  | 2021 | Inpatient (non-ICU); mean of 121.0 days post discharge | 19/357    | 5.30%  |
| Headache | HP:0002315 | Headache                                             | PMID:33273026 | Arnold             | 2020 | Inpatient (ICU); mean of 84.0 days post discharge      | 0/18      | 0.00%  |
| Headache | HP:0002315 | Headache                                             | PMID:33273026 | Arnold             | 2020 | Inpatient (non-ICU); mean of 84.0 days post discharge  | 1/65      | 1.50%  |
| Headache | HP:0002315 | Headache                                             | PMID:33273026 | Arnold             | 2020 | Inpatient (non-ICU); mean of 84.0 days post discharge  | 01/27/21  | 3.70%  |
| Headache | HP:0002315 | Headache At follow-up                                | PMID:33502487 | Bellan             | 2021 | Inpatient; mean of 105.0 days post discharge           | 0/238     | 0.00%  |
| Headache | HP:0002315 | Headache                                             | PMID:33502487 | Bellan             | 2021 | Inpatient; mean of 105.0 days post discharge           | 0/238     | 0.00%  |
| Headache | HP:0002315 | Headache                                             | PMID:32644129 | Carfi              | 2020 | Inpatient; mean of 60.3 days post discharge            | 13/143    | 9.10%  |
| Headache | HP:0002315 | Flulike symptoms (Myalgia, headache and/or asthenia) | PMID:33031948 | Carvalho-Schneider | 2021 | Mixed; mean of 60.0 days post diagnosis                | 28/130    | 21.50% |
| Headache | HP:0002315 | Flulike symptoms (Myalgia, headache and/or asthenia) | PMID:33031948 | Carvalho-Schneider | 2021 | Mixed; mean of 30.0 days post diagnosis                | 54/150    | 36.00% |
| Headache | HP:0002315 | headache (23%)                                       | PMID:33564789 | Chun               | 2021 | Mixed; mean of 63.0 days post diagnosis                | 14/61     | 23.00% |
| Headache | HP:0002315 | Headache                                             | PMID:33120193 | Daher              | 2020 | Inpatient (ICU); mean of 56.0 days post discharge      | 5/33      | 15.20% |
| Headache | HP:0002315 | Headache                                             | PMID:33657671 | Darley             | 2021 | Mixed; mean of 69.0 days post diagnosis                | 7/78      | 9.00%  |
| Headache | HP:0002315 | Headaches, behind the eyes                           | PMID:-1       | Davis              | 2020 | Mixed; mean of 114.5 days post diagnosis               | 1509/3762 | 40.10% |
| Headache | HP:0002315 | Headache                                             | PMID:33785495 | Dennis             | 2021 | Inpatient; mean of 138.0 days post discharge           | 27/37     | 73.00% |
| Headache | HP:0002315 | Headache                                             | PMID:33785495 | Dennis             | 2021 | Outpatient; mean of 141.0 days post diagnosis          | 138/163   | 84.70% |
| Headache | HP:0002315 | Headache (38%)                                       | PMID:33257910 | Goertz             | 2020 | Mixed; mean of 79.0 days post diagnosis                | 803/2113  | 38.00% |
| Headache | HP:0002315 | Headache                                             | PMID:33755344 | Graham             | 2021 | Outpatient; mean of 141.0 days post diagnosis          | 68/100    | 68.00% |
| Headache | HP:0002315 | Headache                                             | PMID:33825846 | Havervall          | 2021 | Outpatient; mean of 120.0 days post diagnosis          | 8/323     | 2.50%  |
| Headache | HP:0002315 | Headache                                             | PMID:33825846 | Havervall          | 2021 | Outpatient; mean of 60.0 days post diagnosis           | 9/323     | 2.80%  |
| Headache | HP:0002315 | Headache                                             | PMID:33825846 | Havervall          | 2021 | Outpatient; mean of 240.0 days post diagnosis          | 5/323     | 1.50%  |
| Headache | HP:0002315 | Headache                                             | PMID:33428867 | Huang              | 2021 | Inpatient; mean of 186.0 days post discharge           | 33/1655   | 2.00%  |
| Headache | HP:0002315 | Continuous headache                                  | PMID:33680620 | Iqbal              | 2021 | Mixed; mean of 38.1 days post diagnosis                | 57/158    | 36.10% |
| Headache | HP:0002315 | Headache                                             | PMID:33306721 | Jacobs             | 2020 | Inpatient (non-ICU); mean of 35.0 days post discharge  | 23/183    | 12.60% |
| Headache | HP:0002315 | Headache                                             | PMID:33624010 | Jacobson           | 2021 | Inpatient; mean of 119.3 days post discharge           | 0/22      | 0.00%  |
| Headache | HP:0002315 | Headache                                             | PMID:33624010 | Jacobson           | 2021 | Outpatient; mean of 119.3 days post diagnosis          | 7/96      | 7.30%  |
| Headache | HP:0002315 | Headache                                             | PMID:33606031 | Logue              | 2021 | Inpatient; mean of 169.0 days post discharge           | 0/16      | 0.00%  |
| Headache | HP:0002315 | Headache                                             | PMID:33606031 | Logue              | 2021 | Outpatient; mean of 169.0 days post diagnosis          | 8/161     | 5.00%  |
| Headache | HP:0002315 | headaches                                            | PMID:33205450 | Ludvigsson         | 2021 | Outpatient; mean of 210.0 days post diagnosis          | 04/05/21  | 80.00% |
| Headache | HP:0002315 | Headache                                             | PMID:33450302 | Moreno-Perez       | 2021 | Mixed; mean of 77.0 days post diagnosis                | 49/277    | 17.70% |
| Headache | HP:0002315 | Headache                                             | PMID:33865161 | Ordinola Navarro   | 2021 | Mixed; mean of 40.0 days post diagnosis                | 11/115    | 9.60%  |
| Headache | HP:0002315 | Headache (Figure 1)                                  | PMID:33252665 | Petersen           | 2020 | Outpatient; mean of 99.0 days post diagnosis           | 13/180    | 7.20%  |
| Headache | HP:0002315 | Cefalea 11%                                          | PMID:33787016 | Prieto             | 2021 | Mixed; mean of 53.0 days post diagnosis                | 9/85      | 10.60% |
| Headache | HP:0002315 | New cephalaea                                        | PMID:33682276 | Rass               | 2021 | Outpatient; mean of 90.0 days post diagnosis           | 1/32      | 3.10%  |
| Headache | HP:0002315 | New cephalaea                                        | PMID:33682276 | Rass               | 2021 | Inpatient (non-ICU); mean of 90.0 days post discharge  | 2/72      | 2.80%  |
| Headache | HP:0002315 | New cephalaea                                        | PMID:33682276 | Rass               | 2021 | Inpatient (ICU); mean of 90.0 days post discharge      | 03/31/21  | 9.70%  |

SupplementalFile2

|          |            |                                                      |               |                    |      |                                                        |           |        |
|----------|------------|------------------------------------------------------|---------------|--------------------|------|--------------------------------------------------------|-----------|--------|
| Headache | HP:0002315 | Headache                                             | PMID:33273028 | Stavem             | 2020 | Outpatient; mean of 117.0 days post diagnosis          | 27/451    | 6.00%  |
| Headache | HP:0002315 | Headaches                                            | PMID:33654513 | Suárez-Robles      | 2020 | Inpatient; mean of 90.0 days post discharge            | 33/134    | 24.60% |
| Headache | HP:0002315 | Headache                                             | PMID:32730238 | Tenforde           | 2020 | Outpatient; mean of 17.5 days post diagnosis           | 44/274    | 16.10% |
| Headache | HP:0002315 | cephalgia                                            | PMID:33479105 | Trinkmann          | 2021 | Mixed; mean of 68.0 days post diagnosis                | 1/246     | 0.40%  |
| Headache | HP:0002315 | Headache                                             | PMID:33461632 | Venturelli         | 2021 | Mixed; mean of 81.0 days post diagnosis                | 4/515     | 0.80%  |
| Headache | HP:0002315 | Headaches                                            | PMID:33729425 | Writing Committee  | 2021 | Inpatient (ICU); mean of 93.0 days post discharge      | 1/62      | 1.60%  |
| Headache | HP:0002315 | Headaches                                            | PMID:33729425 | Writing Committee  | 2021 | Inpatient (non-ICU); mean of 121.0 days post discharge | 22/358    | 6.10%  |
| Headache | HP:0002315 | headache (18.18%)                                    | PMID:32838236 | Zhao               | 2020 | Inpatient; mean of 78.5 days post discharge            | 10/55     | 18.20% |
| Cough    | HP:0012735 | Cough                                                | PMID:33273026 | Arnold             | 2020 | Inpatient (ICU); mean of 84.0 days post discharge      | 01/18/21  | 5.60%  |
| Cough    | HP:0012735 | Cough                                                | PMID:33273026 | Arnold             | 2020 | Inpatient (non-ICU); mean of 84.0 days post discharge  | 10/65     | 15.40% |
| Cough    | HP:0012735 | Cough                                                | PMID:33273026 | Arnold             | 2020 | Inpatient (non-ICU); mean of 84.0 days post discharge  | 02/27/21  | 7.40%  |
| Cough    | HP:0012735 | Cough at follow up                                   | PMID:33502487 | Bellan             | 2021 | Inpatient; mean of 105.0 days post discharge           | 6/238     | 2.50%  |
| Cough    | HP:0012735 | Cough                                                | PMID:33502487 | Bellan             | 2021 | Inpatient; mean of 105.0 days post discharge           | 6/238     | 2.50%  |
| Cough    | HP:0012735 | Cough                                                | PMID:32644129 | Carfi              | 2020 | Inpatient; mean of 60.3 days post discharge            | 24/143    | 16.80% |
| Cough    | HP:0012735 | cough (17%)                                          | PMID:33731329 | Cheng              | 2021 | Mixed; mean of 63.0 days post diagnosis                | 19/113    | 16.80% |
| Cough    | HP:0012735 | Cough                                                | PMID:33175566 | Chopra             | 2020 | Inpatient; mean of 60.0 days post discharge            | 75/488    | 15.40% |
| Cough    | HP:0012735 | cough (58%)                                          | PMID:33564789 | Chun               | 2021 | Mixed; mean of 63.0 days post diagnosis                | 35/61     | 57.40% |
| Cough    | HP:0012735 | Cough                                                | PMID:33120193 | Daher              | 2020 | Inpatient (ICU); mean of 56.0 days post discharge      | 11/33     | 33.30% |
| Cough    | HP:0012735 | Cough                                                | PMID:33657671 | Darley             | 2021 | Mixed; mean of 69.0 days post diagnosis                | 14/78     | 17.90% |
| Cough    | HP:0012735 | Cough                                                | PMID:33785495 | Dennis             | 2021 | Inpatient; mean of 138.0 days post discharge           | 29/37     | 78.40% |
| Cough    | HP:0012735 | Cough                                                | PMID:33785495 | Dennis             | 2021 | Outpatient; mean of 141.0 days post diagnosis          | 117/163   | 71.80% |
| Cough    | HP:0012735 | Cough                                                | PMID:32853602 | Garrigues          | 2020 | Inpatient (non-ICU); mean of 110.9 days post discharge | 14/96     | 14.60% |
| Cough    | HP:0012735 | Cough                                                | PMID:32853602 | Garrigues          | 2020 | Inpatient (ICU); mean of 110.9 days post discharge     | 06/24/21  | 25.00% |
| Cough    | HP:0012735 | Cough (29%)                                          | PMID:33257910 | Goertz             | 2020 | Mixed; mean of 79.0 days post diagnosis                | 613/2113  | 29.00% |
| Cough    | HP:0012735 | Persistent cough                                     | PMID:33680620 | Iqbal              | 2021 | Mixed; mean of 38.1 days post diagnosis                | 70/158    | 44.30% |
| Cough    | HP:0012735 | Cough                                                | PMID:33306721 | Jacobs             | 2020 | Inpatient (non-ICU); mean of 35.0 days post discharge  | 46/183    | 25.10% |
| Cough    | HP:0012735 | Cough                                                | PMID:33624010 | Jacobson           | 2021 | Inpatient; mean of 119.3 days post discharge           | 0/22      | 0.00%  |
| Cough    | HP:0012735 | Cough                                                | PMID:33624010 | Jacobson           | 2021 | Outpatient; mean of 119.3 days post diagnosis          | 1/96      | 1.00%  |
| Cough    | HP:0012735 | Cough                                                | PMID:33289374 | Liang              | 2020 | Inpatient (non-ICU); mean of 90.0 days post discharge  | 45/76     | 59.20% |
| Cough    | HP:0012735 | Cough                                                | PMID:32692945 | Liu                | 2020 | Inpatient; mean of 28.0 days post discharge            | 8/51      | 15.70% |
| Cough    | HP:0012735 | Cough                                                | PMID:33606031 | Logue              | 2021 | Inpatient; mean of 169.0 days post discharge           | 01/16/21  | 6.30%  |
| Cough    | HP:0012735 | Cough                                                | PMID:33606031 | Logue              | 2021 | Outpatient; mean of 169.0 days post diagnosis          | 5/161     | 3.10%  |
| Cough    | HP:0012735 | chronic cough                                        | PMID:33205450 | Ludvigsson         | 2021 | Outpatient; mean of 210.0 days post diagnosis          | 01/05/21  | 20.00% |
| Cough    | HP:0012735 | at early follow-up, 34% had persistent cough         | PMID:33172844 | Mandal             | 2020 | Inpatient; mean of 54.0 days post discharge            | 131/384   | 34.10% |
| Cough    | HP:0012735 | Cough                                                | PMID:33450302 | Moreno-Perez       | 2021 | Mixed; mean of 77.0 days post diagnosis                | 59/277    | 21.30% |
| Cough    | HP:0012735 | Cough                                                | PMID:33865161 | Ordinola Navarro   | 2021 | Mixed; mean of 40.0 days post diagnosis                | 7/115     | 6.10%  |
| Cough    | HP:0012735 | la tos (33%)                                         | PMID:33787016 | Prieto             | 2021 | Mixed; mean of 53.0 days post diagnosis                | 28/85     | 32.90% |
| Cough    | HP:0012735 | cough (5%)                                           | PMID:33521308 | Rosales-Castillo   | 2021 | Inpatient; mean of 50.8 days post discharge            | 6/118     | 5.10%  |
| Cough    | HP:0012735 | Cough                                                | PMID:33303539 | Sonnweber          | 2020 | Mixed; mean of 103.0 days post diagnosis               | 25/145    | 17.20% |
| Cough    | HP:0012735 | Cough                                                | PMID:33654513 | Suárez-Robles      | 2020 | Inpatient; mean of 90.0 days post discharge            | 36/134    | 26.90% |
| Cough    | HP:0012735 | Cough                                                | PMID:33413976 | Taboada            | 2021 | Inpatient (ICU); mean of 180.0 days post discharge     | 13/91     | 14.30% |
| Cough    | HP:0012735 | Cough                                                | PMID:32730238 | Tenforde           | 2020 | Outpatient; mean of 17.5 days post diagnosis           | 123/274   | 44.90% |
| Cough    | HP:0012735 | cough                                                | PMID:33479105 | Trinkmann          | 2021 | Mixed; mean of 68.0 days post diagnosis                | 35/246    | 14.20% |
| Cough    | HP:0012735 | Cough                                                | PMID:33461632 | Venturelli         | 2021 | Mixed; mean of 81.0 days post diagnosis                | 23/515    | 4.50%  |
| Cough    | HP:0012735 | 23% of patients reported the presence of cough       | PMID:33008936 | Wong               | 2020 | Inpatient; mean of 91.0 days post discharge            | 18/78     | 23.10% |
| Cough    | HP:0012735 | Cough                                                | PMID:33729425 | Writing Committee  | 2021 | Inpatient (ICU); mean of 93.0 days post discharge      | 5/62      | 8.10%  |
| Cough    | HP:0012735 | Cough                                                | PMID:33729425 | Writing Committee  | 2021 | Inpatient (non-ICU); mean of 121.0 days post discharge | 21/420    | 5.00%  |
| Cough    | HP:0012735 | Cough                                                | PMID:32979574 | Xiong              | 2021 | Inpatient; mean of 97.0 days post discharge            | 38/538    | 7.10%  |
| Myalgia  | HP:0003326 | Myalgia                                              | PMID:33273026 | Arnold             | 2020 | Inpatient (ICU); mean of 84.0 days post discharge      | 07/18/21  | 38.90% |
| Myalgia  | HP:0003326 | Myalgia                                              | PMID:33273026 | Arnold             | 2020 | Inpatient (non-ICU); mean of 84.0 days post discharge  | 14/65     | 21.50% |
| Myalgia  | HP:0003326 | Myalgia                                              | PMID:33273026 | Arnold             | 2020 | Inpatient (non-ICU); mean of 84.0 days post discharge  | 04/27/21  | 14.80% |
| Myalgia  | HP:0003326 | Myalgia At follow-up                                 | PMID:33502487 | Bellan             | 2021 | Inpatient; mean of 105.0 days post discharge           | 14/238    | 5.90%  |
| Myalgia  | HP:0003326 | Myalgia                                              | PMID:33502487 | Bellan             | 2021 | Inpatient; mean of 105.0 days post discharge           | 14/238    | 5.90%  |
| Myalgia  | HP:0003326 | Myalgia                                              | PMID:32644129 | Carfi              | 2020 | Inpatient; mean of 60.3 days post discharge            | 7/143     | 4.90%  |
| Myalgia  | HP:0003326 | Flulike symptoms (Myalgia, headache and/or asthenia) | PMID:33031948 | Carvalho-Schneider | 2021 | Mixed; mean of 60.0 days post diagnosis                | 28/130    | 21.50% |
| Myalgia  | HP:0003326 | Flulike symptoms (Myalgia, headache and/or asthenia) | PMID:33031948 | Carvalho-Schneider | 2021 | Mixed; mean of 30.0 days post diagnosis                | 54/150    | 36.00% |
| Myalgia  | HP:0003326 | Myalgia                                              | PMID:33120193 | Daher              | 2020 | Inpatient (ICU); mean of 56.0 days post discharge      | 5/33      | 15.20% |
| Myalgia  | HP:0003326 | Muscle aches                                         | PMID:33657671 | Darley             | 2021 | Mixed; mean of 69.0 days post diagnosis                | 5/78      | 6.40%  |
| Myalgia  | HP:0003326 | Muscle aches                                         | PMID:-1       | Davis              | 2020 | Mixed; mean of 114.5 days post diagnosis               | 2601/3762 | 69.10% |
| Myalgia  | HP:0003326 | Muscle ache                                          | PMID:33785495 | Dennis             | 2021 | Inpatient; mean of 138.0 days post discharge           | 31/37     | 83.80% |
| Myalgia  | HP:0003326 | Muscle ache                                          | PMID:33785495 | Dennis             | 2021 | Outpatient; mean of 141.0 days post diagnosis          | 142/163   | 87.10% |
| Myalgia  | HP:0003326 | Muscle pain (36%)                                    | PMID:33257910 | Goertz             | 2020 | Mixed; mean of 79.0 days post diagnosis                | 761/2113  | 36.00% |

SupplementalFile2

|            |            |                                |               |                    |      |                                                        |           |         |
|------------|------------|--------------------------------|---------------|--------------------|------|--------------------------------------------------------|-----------|---------|
| Myalgia    | HP:0003326 | Myalgia                        | PMID:33755344 | Graham             | 2021 | Outpatient; mean of 141.0 days post diagnosis          | 55/100    | 55.00%  |
| Myalgia    | HP:0003326 | Muscle/joint pain              | PMID:33825846 | Havervall          | 2021 | Outpatient; mean of 120.0 days post diagnosis          | 5/323     | 1.50%   |
| Myalgia    | HP:0003326 | Muscle/joint pain              | PMID:33825846 | Havervall          | 2021 | Outpatient; mean of 60.0 days post diagnosis           | 5/323     | 1.50%   |
| Myalgia    | HP:0003326 | Muscle/joint pain              | PMID:33825846 | Havervall          | 2021 | Outpatient; mean of 240.0 days post diagnosis          | 2/323     | 0.60%   |
| Myalgia    | HP:0003326 | Myalgia                        | PMID:33428867 | Huang              | 2021 | Inpatient; mean of 186.0 days post discharge           | 39/1655   | 2.40%   |
| Myalgia    | HP:0003326 | Muscular pain                  | PMID:33306721 | Jacobs             | 2020 | Inpatient (non-ICU); mean of 35.0 days post discharge  | 39/183    | 21.30%  |
| Myalgia    | HP:0003326 | Myalgias                       | PMID:33624010 | Jacobson           | 2021 | Inpatient; mean of 119.3 days post discharge           | 05/22/21  | 22.70%  |
| Myalgia    | HP:0003326 | Myalgias                       | PMID:33624010 | Jacobson           | 2021 | Outpatient; mean of 119.3 days post diagnosis          | 16/96     | 16.70%  |
| Myalgia    | HP:0003326 | Muscle or body aches           | PMID:33606031 | Logue              | 2021 | Inpatient; mean of 169.0 days post discharge           | 01/16/21  | 6.30%   |
| Myalgia    | HP:0003326 | Muscle or body aches           | PMID:33606031 | Logue              | 2021 | Outpatient; mean of 169.0 days post diagnosis          | 10/161    | 6.20%   |
| Myalgia    | HP:0003326 | muscle pain                    | PMID:33205450 | Ludvigsson         | 2021 | Outpatient; mean of 210.0 days post diagnosis          | 03/05/21  | 60.00%  |
| Myalgia    | HP:0003326 | Myalgias-arthralgias           | PMID:33450302 | Moreno-Perez       | 2021 | Mixed; mean of 77.0 days post diagnosis                | 54/277    | 19.50%  |
| Myalgia    | HP:0003326 | Myalgia (Figure 1)             | PMID:33252665 | Petersen           | 2020 | Outpatient; mean of 99.0 days post diagnosis           | 13/180    | 7.20%   |
| Myalgia    | HP:0003326 | Mialgias                       | PMID:33787016 | Prieto             | 2021 | Mixed; mean of 53.0 days post diagnosis                | 0/85      | 0.00%   |
| Myalgia    | HP:0003326 | Myalgia/persistent muscle pain | PMID:33682276 | Rass               | 2021 | Outpatient; mean of 90.0 days post diagnosis           | 2/32      | 6.30%   |
| Myalgia    | HP:0003326 | Myalgia/persistent musclepain  | PMID:33682276 | Rass               | 2021 | Inpatient (non-ICU); mean of 90.0 days post discharge  | 6/72      | 8.30%   |
| Myalgia    | HP:0003326 | Myalgia/persistent musclepain  | PMID:33682276 | Rass               | 2021 | Inpatient (ICU); mean of 90.0 days post discharge      | 6/31      | 19.40%  |
| Myalgia    | HP:0003326 | myalgia (13%)                  | PMID:33521308 | Rosales-Castillo   | 2021 | Inpatient; mean of 50.8 days post discharge            | 15/118    | 12.70%  |
| Myalgia    | HP:0003326 | Myalgia                        | PMID:33273028 | Stavem             | 2020 | Outpatient; mean of 117.0 days post diagnosis          | 36/451    | 8.00%   |
| Myalgia    | HP:0003326 | Myalgia                        | PMID:33413976 | Taboada            | 2021 | Inpatient (ICU); mean of 180.0 days post discharge     | 34/91     | 37.40%  |
| Myalgia    | HP:0003326 | Myalgia                        | PMID:33461632 | Venturelli         | 2021 | Mixed; mean of 81.0 days post diagnosis                | 29/515    | 5.60%   |
| Myalgia    | HP:0003326 | Myalgia                        | PMID:32979574 | Xiong              | 2021 | Inpatient; mean of 97.0 days post discharge            | 24/538    | 4.50%   |
| Chest pain | HP:0100749 | Chest pain                     | PMID:33273026 | Arnold             | 2020 | Inpatient (ICU); mean of 84.0 days post discharge      | 02/18/21  | 11.10%  |
| Chest pain | HP:0100749 | Chest pain                     | PMID:33273026 | Arnold             | 2020 | Inpatient (non-ICU); mean of 84.0 days post discharge  | 10/65     | 15.40%  |
| Chest pain | HP:0100749 | Chest pain                     | PMID:33273026 | Arnold             | 2020 | Inpatient (non-ICU); mean of 84.0 days post discharge  | 02/27/21  | 7.40%   |
| Chest pain | HP:0100749 | Chest pain At follow-up        | PMID:33502487 | Bellan             | 2021 | Inpatient; mean of 105.0 days post discharge           | 1/238     | 0.40%   |
| Chest pain | HP:0100749 | Chest pain                     | PMID:33502487 | Bellan             | 2021 | Inpatient; mean of 105.0 days post discharge           | 1/238     | 0.40%   |
| Chest pain | HP:0100749 | Chest pain                     | PMID:32644129 | Carfi              | 2020 | Inpatient; mean of 60.3 days post discharge            | 31/143    | 21.70%  |
| Chest pain | HP:0100749 | Chest pain                     | PMID:33031948 | Carvalho-Schneider | 2021 | Mixed; mean of 60.0 days post diagnosis                | 17/130    | 13.10%  |
| Chest pain | HP:0100749 | Chest pain                     | PMID:33031948 | Carvalho-Schneider | 2021 | Mixed; mean of 30.0 days post diagnosis                | 27/150    | 18.00%  |
| Chest pain | HP:0100749 | chest pain (26%)               | PMID:33564789 | Chun               | 2021 | Mixed; mean of 63.0 days post diagnosis                | 16/61     | 26.20%  |
| Chest pain | HP:0100749 | Chest pain                     | PMID:33657671 | Darley             | 2021 | Mixed; mean of 69.0 days post diagnosis                | 6/78      | 7.70%   |
| Chest pain | HP:0100749 | Pain/burning in chest          | PMID:-1       | Davis              | 2020 | Mixed; mean of 114.5 days post diagnosis               | 1997/3762 | 53.10%  |
| Chest pain | HP:0100749 | Chest pain                     | PMID:33785495 | Dennis             | 2021 | Inpatient; mean of 138.0 days post discharge           | 24/37     | 64.90%  |
| Chest pain | HP:0100749 | Chest pain                     | PMID:33785495 | Dennis             | 2021 | Outpatient; mean of 141.0 days post diagnosis          | 128/163   | 78.50%  |
| Chest pain | HP:0100749 | Chest pain                     | PMID:32853602 | Garrigues          | 2020 | Inpatient (non-ICU); mean of 110.9 days post discharge | 11/96     | 11.50%  |
| Chest pain | HP:0100749 | Chest pain                     | PMID:32853602 | Garrigues          | 2020 | Inpatient (ICU); mean of 110.9 days post discharge     | 02/24/21  | 8.30%   |
| Chest pain | HP:0100749 | Chest pain                     | PMID:33755344 | Graham             | 2021 | Outpatient; mean of 141.0 days post diagnosis          | 37/100    | 37.00%  |
| Chest pain | HP:0100749 | Chest pain                     | PMID:33428867 | Huang              | 2021 | Inpatient; mean of 186.0 days post discharge           | 75/1655   | 4.50%   |
| Chest pain | HP:0100749 | Chest pain                     | PMID:33680620 | Iqbal              | 2021 | Mixed; mean of 38.1 days post diagnosis                | 56/158    | 35.40%  |
| Chest pain | HP:0100749 | Chest pain                     | PMID:33624010 | Jacobson           | 2021 | Inpatient; mean of 119.3 days post discharge           | 02/22/21  | 9.10%   |
| Chest pain | HP:0100749 | Chest pain                     | PMID:33624010 | Jacobson           | 2021 | Outpatient; mean of 119.3 days post diagnosis          | 14/96     | 14.60%  |
| Chest pain | HP:0100749 | chest pain                     | PMID:33205450 | Ludvigsson         | 2021 | Outpatient; mean of 210.0 days post diagnosis          | 05/05/21  | 100.00% |
| Chest pain | HP:0100749 | Dolor toracico 6%              | PMID:33787016 | Prieto             | 2021 | Mixed; mean of 53.0 days post diagnosis                | 5/85      | 5.90%   |
| Chest pain | HP:0100749 | atypical chest pain            | PMID:32730619 | Puntmann           | 2020 | Mixed; mean of 71.0 days post diagnosis                | 17/100    | 17.00%  |
| Chest pain | HP:0100749 | Chest pain                     | PMID:33413976 | Taboada            | 2021 | Inpatient (ICU); mean of 180.0 days post discharge     | 8/91      | 8.80%   |
| Chest pain | HP:0100749 | Chest pain                     | PMID:32730238 | Tenforde           | 2020 | Outpatient; mean of 17.5 days post diagnosis           | 55/274    | 20.10%  |
| Chest pain | HP:0100749 | thoracic pain                  | PMID:33479105 | Trinkmann          | 2021 | Mixed; mean of 68.0 days post diagnosis                | 15/246    | 6.10%   |
| Chest pain | HP:0100749 | Chest pain                     | PMID:33461632 | Venturelli         | 2021 | Mixed; mean of 81.0 days post diagnosis                | 24/515    | 4.70%   |
| Chest pain | HP:0100749 | Chest discomfort/pain          | PMID:33729425 | Writing Committee  | 2021 | Inpatient (ICU); mean of 93.0 days post discharge      | 9/62      | 14.50%  |
| Chest pain | HP:0100749 | Chest discomfort/pain          | PMID:33729425 | Writing Committee  | 2021 | Inpatient (non-ICU); mean of 121.0 days post discharge | 25/356    | 7.00%   |
| Chest pain | HP:0100749 | Chest pain                     | PMID:32979574 | Xiong              | 2021 | Inpatient; mean of 97.0 days post discharge            | 66/538    | 12.30%  |
| Chest pain | HP:0100749 | Chest pain                     | PMID:33532720 | de Graaf           | 2021 | Inpatient (ICU); mean of 42.0 days post discharge      | 8/34      | 23.50%  |
| Chest pain | HP:0100749 | chest pain (all types)         | PMID:33532720 | de Graaf           | 2021 | Inpatient (non-ICU); mean of 42.0 days post discharge  | 7/47      | 14.90%  |
| Fever      | HP:0001945 | Fever                          | PMID:33273026 | Arnold             | 2020 | Inpatient (ICU); mean of 84.0 days post discharge      | 0/18      | 0.00%   |
| Fever      | HP:0001945 | Fever                          | PMID:33273026 | Arnold             | 2020 | Inpatient (non-ICU); mean of 84.0 days post discharge  | 1/65      | 1.50%   |
| Fever      | HP:0001945 | Fever                          | PMID:33273026 | Arnold             | 2020 | Inpatient (non-ICU); mean of 84.0 days post discharge  | 0/27      | 0.00%   |
| Fever      | HP:0001945 | Fever at follow up             | PMID:33502487 | Bellan             | 2021 | Inpatient; mean of 105.0 days post discharge           | 0/238     | 0.00%   |
| Fever      | HP:0001945 | Fever                          | PMID:33502487 | Bellan             | 2021 | Inpatient; mean of 105.0 days post discharge           | 0/238     | 0.00%   |
| Fever      | HP:0001945 | Fever (temperature >38°C)      | PMID:33031948 | Carvalho-Schneider | 2021 | Mixed; mean of 60.0 days post diagnosis                | 0/130     | 0.00%   |
| Fever      | HP:0001945 | Fever                          | PMID:33031948 | Carvalho-Schneider | 2021 | Mixed; mean of 30.0 days post diagnosis                | 5/150     | 3.30%   |
| Fever      | HP:0001945 | fever (47%)                    | PMID:33564789 | Chun               | 2021 | Mixed; mean of 63.0 days post diagnosis                | 29/61     | 47.50%  |

SupplementalFile2

|            |            |                                                                                                                                                      |               |              |      |                                                       |           |        |
|------------|------------|------------------------------------------------------------------------------------------------------------------------------------------------------|---------------|--------------|------|-------------------------------------------------------|-----------|--------|
| Fever      | HP:0001945 | Fever                                                                                                                                                | PMID:33120193 | Daher        | 2020 | Inpatient (ICU); mean of 56.0 days post discharge     | 1/33      | 3.00%  |
| Fever      | HP:0001945 | Fever/Chills                                                                                                                                         | PMID:33657671 | Darley       | 2021 | Mixed; mean of 69.0 days post diagnosis               | 5/78      | 6.40%  |
| Fever      | HP:0001945 | Fever (>100.4 F)                                                                                                                                     | PMID:-1       | Davis        | 2020 | Mixed; mean of 114.5 days post diagnosis              | 1158/3762 | 30.80% |
| Fever      | HP:0001945 | Fever                                                                                                                                                | PMID:33785495 | Dennis       | 2021 | Inpatient; mean of 138.0 days post discharge          | 31/37     | 83.80% |
| Fever      | HP:0001945 | Fever                                                                                                                                                | PMID:33785495 | Dennis       | 2021 | Outpatient; mean of 141.0 days post diagnosis         | 113/163   | 69.30% |
| Fever      | HP:0001945 | Fever (body temperature above 38 degrees) (2%)                                                                                                       | PMID:33257910 | Goertz       | 2020 | Mixed; mean of 79.0 days post diagnosis               | 42/21133  | 0.20%  |
| Fever      | HP:0001945 | Fever                                                                                                                                                | PMID:33306721 | Jacobs       | 2020 | Inpatient (non-ICU); mean of 35.0 days post discharge | 2/183     | 1.10%  |
| Fever      | HP:0001945 | Fever/Chills                                                                                                                                         | PMID:33624010 | Jacobson     | 2021 | Inpatient; mean of 119.3 days post discharge          | 0/22      | 0.00%  |
| Fever      | HP:0001945 | Fever/chills                                                                                                                                         | PMID:33624010 | Jacobson     | 2021 | Outpatient; mean of 119.3 days post diagnosis         | 1/96      | 1.00%  |
| Fever      | HP:0001945 | Fever                                                                                                                                                | PMID:33289374 | Liang        | 2020 | Inpatient (non-ICU); mean of 90.0 days post discharge | 15/76     | 19.70% |
| Fever      | HP:0001945 | Feeling feverish                                                                                                                                     | PMID:33606031 | Logue        | 2021 | Inpatient; mean of 169.0 days post diagnosis          | 0/16      | 0.00%  |
| Fever      | HP:0001945 | Feeling feverish                                                                                                                                     | PMID:33606031 | Logue        | 2021 | Outpatient; mean of 169.0 days post diagnosis         | 4/161     | 2.50%  |
| Fever      | HP:0001945 | remitting fever                                                                                                                                      | PMID:33205450 | Ludvigsson   | 2021 | Outpatient; mean of 210.0 days post diagnosis         | 02/05/21  | 40.00% |
| Fever      | HP:0001945 | Fever                                                                                                                                                | PMID:33450302 | Moreno-Perez | 2021 | Mixed; mean of 77.0 days post diagnosis               | 0/277     | 0.00%  |
| Fever      | HP:0001945 | Fever (Figure 1)                                                                                                                                     | PMID:33252665 | Petersen     | 2020 | Outpatient; mean of 99.0 days post diagnosis          | 0/180     | 0.00%  |
| Fever      | HP:0001945 | Fiebre                                                                                                                                               | PMID:33787016 | Prieto       | 2021 | Mixed; mean of 53.0 days post diagnosis               | 0/85      | 0.00%  |
| Fever      | HP:0001945 | Fever                                                                                                                                                | PMID:33303539 | Sonnweber    | 2020 | Mixed; mean of 103.0 days post diagnosis              | 0/145     | 0.00%  |
| Fever      | HP:0001945 | Fever                                                                                                                                                | PMID:33273028 | Stavem       | 2020 | Outpatient; mean of 117.0 days post diagnosis         | 0/451     | 0.00%  |
| Fever      | HP:0001945 | Fever                                                                                                                                                | PMID:32730238 | Tenforde     | 2020 | Outpatient; mean of 17.5 days post diagnosis          | 8/274     | 2.90%  |
| Fever      | HP:0001945 | pyrexia                                                                                                                                              | PMID:33479105 | Trinkmann    | 2021 | Mixed; mean of 68.0 days post diagnosis               | 1/246     | 0.40%  |
| Fever      | HP:0001945 | Fever                                                                                                                                                | PMID:33461632 | Venturelli   | 2021 | Mixed; mean of 81.0 days post diagnosis               | 4/515     | 0.80%  |
| Diarrhea   | HP:0002014 | Diarrhoea                                                                                                                                            | PMID:33273026 | Arnold       | 2020 | Inpatient (ICU); mean of 84.0 days post discharge     | 0/18      | 0.00%  |
| Diarrhea   | HP:0002014 | Diarrhoea                                                                                                                                            | PMID:33273026 | Arnold       | 2020 | Inpatient (non-ICU); mean of 84.0 days post discharge | 1/65      | 1.50%  |
| Diarrhea   | HP:0002014 | Diarrhoea                                                                                                                                            | PMID:33273026 | Arnold       | 2020 | Inpatient (non-ICU); mean of 84.0 days post discharge | 0/27      | 0.00%  |
| Diarrhea   | HP:0002014 | Diarrhea At follow-up                                                                                                                                | PMID:33502487 | Bellan       | 2021 | Inpatient; mean of 105.0 days post discharge          | 3/238     | 1.30%  |
| Diarrhea   | HP:0002014 | Diarrhea                                                                                                                                             | PMID:33502487 | Bellan       | 2021 | Inpatient; mean of 105.0 days post discharge          | 3/238     | 1.30%  |
| Diarrhea   | HP:0002014 | Diarrhea                                                                                                                                             | PMID:32644129 | Carfi        | 2020 | Inpatient; mean of 60.3 days post discharge           | 4/143     | 2.80%  |
| Diarrhea   | HP:0002014 | Diarrhea                                                                                                                                             | PMID:33564789 | Chun         | 2021 | Mixed; mean of 63.0 days post diagnosis               | 7/61      | 11.50% |
| Diarrhea   | HP:0002014 | Diarrhea                                                                                                                                             | PMID:33120193 | Daher        | 2020 | Inpatient (ICU); mean of 56.0 days post discharge     | 3/33      | 9.10%  |
| Diarrhea   | HP:0002014 | Diarrhoea                                                                                                                                            | PMID:33657671 | Darley       | 2021 | Mixed; mean of 69.0 days post diagnosis               | 3/78      | 3.80%  |
| Diarrhea   | HP:0002014 | Diarrhea                                                                                                                                             | PMID:-1       | Davis        | 2020 | Mixed; mean of 114.5 days post diagnosis              | 2246/3762 | 59.70% |
| Diarrhea   | HP:0002014 | Diarrhoea                                                                                                                                            | PMID:33785495 | Dennis       | 2021 | Inpatient; mean of 138.0 days post discharge          | 27/37     | 73.00% |
| Diarrhea   | HP:0002014 | Diarrhoea                                                                                                                                            | PMID:33785495 | Dennis       | 2021 | Outpatient; mean of 141.0 days post diagnosis         | 91/163    | 55.80% |
| Diarrhea   | HP:0002014 | Diarrhoea (12%)                                                                                                                                      | PMID:33257910 | Goertz       | 2020 | Mixed; mean of 79.0 days post diagnosis               | 211/2113  | 10.00% |
| Diarrhea   | HP:0002014 | Diarrhea                                                                                                                                             | PMID:33755344 | Graham       | 2021 | Outpatient; mean of 141.0 days post diagnosis         | 19/100    | 19.00% |
| Diarrhea   | HP:0002014 | Diarrhoea or vomiting                                                                                                                                | PMID:33428867 | Huang        | 2021 | Inpatient; mean of 186.0 days post discharge          | 80/1655   | 4.80%  |
| Diarrhea   | HP:0002014 | Diarrhea                                                                                                                                             | PMID:33306721 | Jacobs       | 2020 | Inpatient (non-ICU); mean of 35.0 days post discharge | 7/183     | 3.80%  |
| Diarrhea   | HP:0002014 | Nausea/vomiting/diarrhea                                                                                                                             | PMID:33624010 | Jacobson     | 2021 | Inpatient; mean of 119.3 days post discharge          | 0/22      | 0.00%  |
| Diarrhea   | HP:0002014 | Nausea/vomiting/Diarrhea                                                                                                                             | PMID:33624010 | Jacobson     | 2021 | Outpatient; mean of 119.3 days post diagnosis         | 8/96      | 8.30%  |
| Diarrhea   | HP:0002014 | Diarrhea                                                                                                                                             | PMID:33289374 | Liang        | 2020 | Inpatient (non-ICU); mean of 90.0 days post discharge | 20/76     | 26.30% |
| Diarrhea   | HP:0002014 | Diarrhea                                                                                                                                             | PMID:33606031 | Logue        | 2021 | Inpatient; mean of 169.0 days post discharge          | 0/16      | 0.00%  |
| Diarrhea   | HP:0002014 | Diarrhea                                                                                                                                             | PMID:33606031 | Logue        | 2021 | Outpatient; mean of 169.0 days post diagnosis         | 5/161     | 3.10%  |
| Diarrhea   | HP:0002014 | diarrhoea                                                                                                                                            | PMID:33205450 | Ludvigsson   | 2021 | Outpatient; mean of 210.0 days post diagnosis         | 02/05/21  | 40.00% |
| Diarrhea   | HP:0002014 | Diarrhoea                                                                                                                                            | PMID:33450302 | Moreno-Perez | 2021 | Mixed; mean of 77.0 days post diagnosis               | 29/277    | 10.50% |
| Diarrhea   | HP:0002014 | Diarrhea (Figure 1)                                                                                                                                  | PMID:33252665 | Petersen     | 2020 | Outpatient; mean of 99.0 days post diagnosis          | 5/180     | 2.80%  |
| Diarrhea   | HP:0002014 | Diarrhea                                                                                                                                             | PMID:33787016 | Prieto       | 2021 | Mixed; mean of 53.0 days post diagnosis               | 0/85      | 0.00%  |
| Diarrhea   | HP:0002014 | Diarrhea or vomiting                                                                                                                                 | PMID:33303539 | Sonnweber    | 2020 | Mixed; mean of 103.0 days post diagnosis              | 13/145    | 9.00%  |
| Diarrhea   | HP:0002014 | Diarrhoea                                                                                                                                            | PMID:33273028 | Stavem       | 2020 | Outpatient; mean of 117.0 days post diagnosis         | 9/451     | 2.00%  |
| Diarrhea   | HP:0002014 | Diarrhea                                                                                                                                             | PMID:32730238 | Tenforde     | 2020 | Outpatient; mean of 17.5 days post diagnosis          | 33/274    | 12.00% |
| Diarrhea   | HP:0002014 | diarrhoea                                                                                                                                            | PMID:33479105 | Trinkmann    | 2021 | Mixed; mean of 68.0 days post diagnosis               | 0/246     | 0.00%  |
| Depression | HP:0000716 | Anxiety/depression                                                                                                                                   | PMID:33113469 | Akter        | 2020 | Inpatient; mean of 28.0 days post discharge           | 159/734   | 21.70% |
| Depression | HP:0000716 | 6% of patients had GAD-2 scores of >3 (6%), representing a positive screen for depression and anxiety respectively                                   | PMID:33731329 | Cheng        | 2021 | Mixed; mean of 63.0 days post diagnosis               | 17/113    | 15.00% |
| Depression | HP:0000716 | The Depression in the Medically Ill questionnaire (DMI-10) 6 was administered to 76 patients; 16 (21%) reported symptoms consistent with depression. | PMID:33657671 | Darley       | 2021 | Mixed; mean of 69.0 days post diagnosis               | 16/76     | 21.10% |
| Depression | HP:0000716 | Depression                                                                                                                                           | PMID:-1       | Davis        | 2020 | Mixed; mean of 114.5 days post diagnosis              | 1779/3762 | 47.30% |
| Depression | HP:0000716 | HADS Depression score abnormal                                                                                                                       | PMID:33676998 | González     | 2021 | Inpatient (ICU); mean of 90.0 days post discharge     | 3/59      | 5.10%  |
| Depression | HP:0000716 | Depression/Anxiety                                                                                                                                   | PMID:33755344 | Graham       | 2021 | Outpatient; mean of 141.0 days post diagnosis         | 47/100    | 47.00% |
| Depression | HP:0000716 | Worsened anxiety/depression                                                                                                                          | PMID:32729939 | Halpin       | 2021 | Inpatient (ICU); mean of 48.0 days post discharge     | 12/32     | 37.50% |
| Depression | HP:0000716 | Worsened anxiety/depression                                                                                                                          | PMID:32729939 | Halpin       | 2021 | Inpatient (non-ICU); mean of 48.0 days post discharge | 11/68     | 16.20% |
| Depression | HP:0000716 | Anxiety or depression                                                                                                                                | PMID:33428867 | Huang        | 2021 | Inpatient; mean of 186.0 days post discharge          | 367/1617  | 22.70% |

SupplementalFile2

|            |            |                                                                                                                    |               |                    |      |                                                        |           |        |
|------------|------------|--------------------------------------------------------------------------------------------------------------------|---------------|--------------------|------|--------------------------------------------------------|-----------|--------|
| Depression | HP:0000716 | anxious or depressed                                                                                               | PMID:33680620 | Iqbal              | 2021 | Mixed; mean of 38.1 days post diagnosis                | 95/158    | 60.10% |
| Depression | HP:0000716 | depression                                                                                                         | PMID:33205450 | Ludvigsson         | 2021 | Outpatient; mean of 210.0 days post diagnosis          | 03/05/21  | 60.00% |
| Depression | HP:0000716 | Fifteen per cent were depressed                                                                                    | PMID:33172844 | Mandal             | 2020 | Inpatient; mean of 54.0 days post discharge            | 58/383    | 15.10% |
| Depression | HP:0000716 | Anxiety/Depression                                                                                                 | PMID:33865161 | Ordinola Navarro   | 2021 | Mixed; mean of 40.0 days post diagnosis                | 60/115    | 52.20% |
| Depression | HP:0000716 | At follow-up, seven patients had mild to moderate depression.                                                      | PMID:32835708 | Ramani             | 2021 | Inpatient (ICU); mean of 39.5 days post discharge      | 07/28/21  | 25.00% |
| Depression | HP:0000716 | PHQ-9, moderate-severe                                                                                             | PMID:33490928 | Ramani             | 2021 | Inpatient; mean of 48.0 days post discharge            | 11/57     | 19.30% |
| Depression | HP:0000716 | Moderately anxious or depressed/Extremely anxious or depressed                                                     | PMID:33413976 | Taboada            | 2021 | Inpatient (ICU); mean of 180.0 days post discharge     | 42/91     | 46.20% |
| Depression | HP:0000716 | HADS-Depression                                                                                                    | PMID:33461632 | Venturelli         | 2021 | Mixed; mean of 81.0 days post diagnosis                | 33/727    | 4.50%  |
| Depression | HP:0000716 | Symptoms of depression (BDI test)                                                                                  | PMID:33729425 | Writing Committee  | 2021 | Inpatient (ICU); mean of 93.0 days post discharge      | 9/50      | 18.00% |
| Depression | HP:0000716 | Symptoms of depression (BDI test)                                                                                  | PMID:33729425 | Writing Committee  | 2021 | Inpatient (non-ICU); mean of 121.0 days post discharge | 26/120    | 21.70% |
| Depression | HP:0000716 | Depression                                                                                                         | PMID:32979574 | Xiong              | 2021 | Inpatient; mean of 97.0 days post discharge            | 23/538    | 4.30%  |
| Depression | HP:0000716 | Depression (PHQ-9 $\geq$ 10)                                                                                       | PMID:33532720 | de Graaf           | 2021 | Inpatient (ICU); mean of 42.0 days post discharge      | 4/34      | 11.80% |
| Depression | HP:0000716 | Depression (PHQ-9 $\geq$ 10)                                                                                       | PMID:33532720 | de Graaf           | 2021 | Inpatient (non-ICU); mean of 42.0 days post discharge  | 6/47      | 12.80% |
| Depression | HP:0000716 | HADS-depression >10, No. (%)                                                                                       | PMID:33220049 | van den Borst      | 2020 | Inpatient (ICU); mean of 91.0 days post discharge      | 4/46      | 8.70%  |
| Depression | HP:0000716 | HADS-depression >10, No. (%)                                                                                       | PMID:33220049 | van den Borst      | 2020 | Outpatient; mean of 91.0 days post diagnosis           | 06/27/21  | 22.20% |
| Depression | HP:0000716 | HADS-depression >10, No. (%)                                                                                       | PMID:33220049 | van den Borst      | 2020 | Inpatient (non-ICU); mean of 91.0 days post discharge  | 4/51      | 7.80%  |
| Arthralgia | HP:0002829 | Arthralgia                                                                                                         | PMID:33273026 | Arnold             | 2020 | Inpatient (ICU); mean of 84.0 days post discharge      | 03/18/21  | 16.70% |
| Arthralgia | HP:0002829 | Arthralgia                                                                                                         | PMID:33273026 | Arnold             | 2020 | Inpatient (non-ICU); mean of 84.0 days post discharge  | 1/65      | 1.50%  |
| Arthralgia | HP:0002829 | Arthralgia                                                                                                         | PMID:33273026 | Arnold             | 2020 | Inpatient (non-ICU); mean of 84.0 days post discharge  | 01/27/21  | 3.70%  |
| Arthralgia | HP:0002829 | Arthralgia At follow-up                                                                                            | PMID:33502487 | Bellan             | 2021 | Inpatient; mean of 105.0 days post discharge           | 14/238    | 5.90%  |
| Arthralgia | HP:0002829 | Arthralgia                                                                                                         | PMID:33502487 | Bellan             | 2021 | Inpatient; mean of 105.0 days post discharge           | 14/238    | 5.90%  |
| Arthralgia | HP:0002829 | Joint pain                                                                                                         | PMID:32644129 | Carfi              | 2020 | Inpatient; mean of 60.3 days post discharge            | 39/143    | 27.30% |
| Arthralgia | HP:0002829 | Arthralgia                                                                                                         | PMID:33031948 | Carvalho-Schneider | 2021 | Mixed; mean of 60.0 days post diagnosis                | 21/130    | 16.20% |
| Arthralgia | HP:0002829 | Arthralgia                                                                                                         | PMID:33031948 | Carvalho-Schneider | 2021 | Mixed; mean of 30.0 days post diagnosis                | 13/150    | 8.70%  |
| Arthralgia | HP:0002829 | Joint pain                                                                                                         | PMID:-1       | Davis              | 2020 | Mixed; mean of 114.5 days post diagnosis               | 1962/3762 | 52.20% |
| Arthralgia | HP:0002829 | Joint pain                                                                                                         | PMID:33785495 | Dennis             | 2021 | Inpatient; mean of 138.0 days post discharge           | 29/37     | 78.40% |
| Arthralgia | HP:0002829 | Joint pain                                                                                                         | PMID:33785495 | Dennis             | 2021 | Outpatient; mean of 141.0 days post diagnosis          | 127/163   | 77.90% |
| Arthralgia | HP:0002829 | Joint pain (27%)                                                                                                   | PMID:33257910 | Goertz             | 2020 | Mixed; mean of 79.0 days post diagnosis                | 465/2113  | 22.00% |
| Arthralgia | HP:0002829 | Muscle/joint pain                                                                                                  | PMID:33825846 | Havervall          | 2021 | Outpatient; mean of 120.0 days post diagnosis          | 5/323     | 1.50%  |
| Arthralgia | HP:0002829 | Muscle/joint pain                                                                                                  | PMID:33825846 | Havervall          | 2021 | Outpatient; mean of 60.0 days post diagnosis           | 5/323     | 1.50%  |
| Arthralgia | HP:0002829 | Muscle/joint pain                                                                                                  | PMID:33825846 | Havervall          | 2021 | Outpatient; mean of 240.0 days post diagnosis          | 2/323     | 0.60%  |
| Arthralgia | HP:0002829 | Joint pain                                                                                                         | PMID:33428867 | Huang              | 2021 | Inpatient; mean of 186.0 days post discharge           | 154/1655  | 9.30%  |
| Arthralgia | HP:0002829 | Joint pain                                                                                                         | PMID:33680620 | Iqbal              | 2021 | Mixed; mean of 38.1 days post diagnosis                | 75/158    | 47.50% |
| Arthralgia | HP:0002829 | Joint pain                                                                                                         | PMID:33306721 | Jacobs             | 2020 | Inpatient (non-ICU); mean of 35.0 days post discharge  | 29/183    | 15.80% |
| Arthralgia | HP:0002829 | joint pain                                                                                                         | PMID:33205450 | Ludvigsson         | 2021 | Outpatient; mean of 210.0 days post diagnosis          | 02/05/21  | 40.00% |
| Arthralgia | HP:0002829 | Myalgias-arthralgias                                                                                               | PMID:33450302 | Moreno-Perez       | 2021 | Mixed; mean of 77.0 days post diagnosis                | 54/277    | 19.50% |
| Arthralgia | HP:0002829 | Arthralgia (Figure 1)                                                                                              | PMID:33252665 | Petersen           | 2020 | Outpatient; mean of 99.0 days post diagnosis           | 20/180    | 11.10% |
| Arthralgia | HP:0002829 | Arthralgia                                                                                                         | PMID:33273028 | Stavem             | 2020 | Outpatient; mean of 117.0 days post diagnosis          | 41/451    | 9.10%  |
| Arthralgia | HP:0002829 | Arthralgia                                                                                                         | PMID:33413976 | Taboada            | 2021 | Inpatient (ICU); mean of 180.0 days post discharge     | 26/91     | 28.60% |
| Arthralgia | HP:0002829 | Arthralgia                                                                                                         | PMID:32979574 | Xiong              | 2021 | Inpatient; mean of 97.0 days post discharge            | 41/538    | 7.60%  |
| Anxiety    | HP:0000739 | Anxiety/depression                                                                                                 | PMID:33113469 | Akter              | 2020 | Inpatient; mean of 28.0 days post discharge            | 159/734   | 21.70% |
| Anxiety    | HP:0000739 | 6% of patients had GAD-2 scores of >3 (6%), representing a positive screen for depression and anxiety respectively | PMID:33731329 | Cheng              | 2021 | Mixed; mean of 63.0 days post diagnosis                | 7/113     | 6.20%  |
| Anxiety    | HP:0000739 | Anxiety                                                                                                            | PMID:-1       | Davis              | 2020 | Mixed; mean of 114.5 days post diagnosis               | 2179/3762 | 57.90% |
| Anxiety    | HP:0000739 | Anxiety                                                                                                            | PMID:33052920 | De Lorenzo         | 2020 | Inpatient; mean of 21.5 days post discharge            | 32/126    | 25.40% |
| Anxiety    | HP:0000739 | Anxiety                                                                                                            | PMID:33052920 | De Lorenzo         | 2020 | Outpatient; mean of 26.0 days post diagnosis           | 23/59     | 39.00% |
| Anxiety    | HP:0000739 | HADS Anxiety score abnormal                                                                                        | PMID:33676998 | González           | 2021 | Inpatient (ICU); mean of 90.0 days post discharge      | 6/59      | 10.20% |
| Anxiety    | HP:0000739 | Depression/Anxiety                                                                                                 | PMID:33755344 | Graham             | 2021 | Outpatient; mean of 141.0 days post diagnosis          | 47/100    | 47.00% |
| Anxiety    | HP:0000739 | Worsened anxiety/depression                                                                                        | PMID:32729939 | Halpin             | 2021 | Inpatient (ICU); mean of 48.0 days post discharge      | 12/32     | 37.50% |
| Anxiety    | HP:0000739 | Worsened anxiety/depression                                                                                        | PMID:32729939 | Halpin             | 2021 | Inpatient (non-ICU); mean of 48.0 days post discharge  | 11/68     | 16.20% |
| Anxiety    | HP:0000739 | Anxiety or depression                                                                                              | PMID:33428867 | Huang              | 2021 | Inpatient; mean of 186.0 days post discharge           | 367/1617  | 22.70% |
| Anxiety    | HP:0000739 | anxious or depressed                                                                                               | PMID:33680620 | Iqbal              | 2021 | Mixed; mean of 38.1 days post diagnosis                | 95/158    | 60.10% |
| Anxiety    | HP:0000739 | Anxiety/Depression                                                                                                 | PMID:33865161 | Ordinola Navarro   | 2021 | Mixed; mean of 40.0 days post diagnosis                | 60/115    | 52.20% |
| Anxiety    | HP:0000739 | GAD-7, moderate - severe                                                                                           | PMID:33490928 | Ramani             | 2021 | Inpatient; mean of 48.0 days post discharge            | 8/57      | 14.00% |
| Anxiety    | HP:0000739 | Anxiety                                                                                                            | PMID:33654513 | Suárez-Robles      | 2020 | Inpatient; mean of 90.0 days post discharge            | 76/134    | 56.70% |
| Anxiety    | HP:0000739 | Moderately anxious or depressed/Extremely anxious or depressed                                                     | PMID:33413976 | Taboada            | 2021 | Inpatient (ICU); mean of 180.0 days post discharge     | 42/91     | 46.20% |
| Anxiety    | HP:0000739 | HADS-Anxiety                                                                                                       | PMID:33461632 | Venturelli         | 2021 | Mixed; mean of 81.0 days post diagnosis                | 82/727    | 11.30% |
| Anxiety    | HP:0000739 | Symptoms of anxiety (HADS-Anxiety)                                                                                 | PMID:33729425 | Writing Committee  | 2021 | Inpatient (ICU); mean of 93.0 days post discharge      | 13/50     | 26.00% |
| Anxiety    | HP:0000739 | Symptoms of anxiety (HADS-Anxiety)                                                                                 | PMID:33729425 | Writing Committee  | 2021 | Inpatient (non-ICU); mean of 121.0 days post discharge | 40/119    | 33.60% |
| Anxiety    | HP:0000739 | Anxiety                                                                                                            | PMID:32979574 | Xiong              | 2021 | Inpatient; mean of 97.0 days post discharge            | 35/538    | 6.50%  |

SupplementalFile2

|              |            |                                                                      |               |                    |      |                                                        |           |         |
|--------------|------------|----------------------------------------------------------------------|---------------|--------------------|------|--------------------------------------------------------|-----------|---------|
| Anxiety      | HP:0000739 | Anxiety (GAD-7 ≥ 10)                                                 | PMID:33532720 | de Graaf           | 2021 | Inpatient (ICU); mean of 42.0 days post discharge      | 1/34      | 2.90%   |
| Anxiety      | HP:0000739 | Anxiety (GAD-7 ≥ 10),                                                | PMID:33532720 | de Graaf           | 2021 | Inpatient (non-ICU); mean of 42.0 days post discharge  | 2/47      | 4.30%   |
| Anxiety      | HP:0000739 | HADS-anxiety >10, No.(%)                                             | PMID:33220049 | van den Borst      | 2020 | Inpatient (ICU); mean of 91.0 days post discharge      | 4/46      | 8.70%   |
| Anxiety      | HP:0000739 | HADS-anxiety >10, No.(%)                                             | PMID:33220049 | van den Borst      | 2020 | Outpatient; mean of 91.0 days post diagnosis           | 02/27/21  | 7.40%   |
| Anxiety      | HP:0000739 | HADS-anxiety >10, No.(%)                                             | PMID:33220049 | van den Borst      | 2020 | Inpatient (non-ICU); mean of 91.0 days post discharge  | 6/51      | 11.80%  |
| Pharyngalgia | HP:0033050 | Sore throat At follow-up                                             | PMID:33502487 | Bellan             | 2021 | Inpatient; mean of 105.0 days post discharge           | 0/238     | 0.00%   |
| Pharyngalgia | HP:0033050 | Sore throat                                                          | PMID:33502487 | Bellan             | 2021 | Inpatient; mean of 105.0 days post discharge           | 0/238     | 0.00%   |
| Pharyngalgia | HP:0033050 | Sore throat                                                          | PMID:32644129 | Carfi              | 2020 | Inpatient; mean of 60.3 days post discharge            | 10/143    | 7.00%   |
| Pharyngalgia | HP:0033050 | Sore throat                                                          | PMID:33564789 | Chun               | 2021 | Mixed; mean of 63.0 days post diagnosis                | 1/61      | 1.60%   |
| Pharyngalgia | HP:0033050 | Sore throat 3 (note authors state Pharyngalgia 0, we will curate 3). | PMID:33120193 | Daher              | 2020 | Inpatient (ICU); mean of 56.0 days post discharge      | 3/33      | 9.10%   |
| Pharyngalgia | HP:0033050 | Sore throat                                                          | PMID:33657671 | Darley             | 2021 | Mixed; mean of 69.0 days post diagnosis                | 1/78      | 1.30%   |
| Pharyngalgia | HP:0033050 | Sore Throat                                                          | PMID:-1       | Davis              | 2020 | Mixed; mean of 114.5 days post diagnosis               | 2239/3762 | 59.50%  |
| Pharyngalgia | HP:0033050 | Sore throat                                                          | PMID:33785495 | Dennis             | 2021 | Inpatient; mean of 138.0 days post discharge           | 23/37     | 62.20%  |
| Pharyngalgia | HP:0033050 | Sore throat                                                          | PMID:33785495 | Dennis             | 2021 | Outpatient; mean of 141.0 days post diagnosis          | 120/163   | 73.60%  |
| Pharyngalgia | HP:0033050 | Sore throat (26%)                                                    | PMID:33257910 | Goertz             | 2020 | Mixed; mean of 79.0 days post diagnosis                | 549/2113  | 26.00%  |
| Pharyngalgia | HP:0033050 | Sore throat or difficult to swallow                                  | PMID:33428867 | Huang              | 2021 | Inpatient; mean of 186.0 days post discharge           | 69/1655   | 4.20%   |
| Pharyngalgia | HP:0033050 | Sore throat                                                          | PMID:33624010 | Jacobson           | 2021 | Inpatient; mean of 119.3 days post discharge           | 0/22      | 0.00%   |
| Pharyngalgia | HP:0033050 | Sore throat                                                          | PMID:33624010 | Jacobson           | 2021 | Outpatient; mean of 119.3 days post diagnosis          | 3/96      | 3.10%   |
| Pharyngalgia | HP:0033050 | Throat discomfort                                                    | PMID:32692945 | Liu                | 2020 | Inpatient; mean of 28.0 days post discharge            | 3/51      | 5.90%   |
| Pharyngalgia | HP:0033050 | Sore throat                                                          | PMID:33606031 | Logue              | 2021 | Inpatient; mean of 169.0 days post discharge           | 01/16/21  | 6.30%   |
| Pharyngalgia | HP:0033050 | Sore throat                                                          | PMID:33606031 | Logue              | 2021 | Outpatient; mean of 169.0 days post diagnosis          | 5/161     | 3.10%   |
| Pharyngalgia | HP:0033050 | sore throat                                                          | PMID:33205450 | Ludvigsson         | 2021 | Outpatient; mean of 210.0 days post diagnosis          | 04/05/21  | 80.00%  |
| Pharyngalgia | HP:0033050 | Sore throat (Figure 1)                                               | PMID:33252665 | Petersen           | 2020 | Outpatient; mean of 99.0 days post diagnosis           | 4/180     | 2.20%   |
| Pharyngalgia | HP:0033050 | odinofagia                                                           | PMID:33787016 | Prieto             | 2021 | Mixed; mean of 53.0 days post diagnosis                | 0/85      | 0.00%   |
| Pharyngalgia | HP:0033050 | Sore throat                                                          | PMID:33273028 | Stavem             | 2020 | Outpatient; mean of 117.0 days post diagnosis          | 23/451    | 5.10%   |
| Pharyngalgia | HP:0033050 | Sore throat                                                          | PMID:32730238 | Tenforde           | 2020 | Outpatient; mean of 17.5 days post diagnosis           | 47/274    | 17.20%  |
| Pharyngalgia | HP:0033050 | sore throat                                                          | PMID:33479105 | Trinkmann          | 2021 | Mixed; mean of 68.0 days post diagnosis                | 1/246     | 0.40%   |
| Pharyngalgia | HP:0033050 | Throat pain                                                          | PMID:32979574 | Xiong              | 2021 | Inpatient; mean of 97.0 days post discharge            | 17/538    | 3.20%   |
| Ageusia      | HP:0041051 | Ageusia At follow-up                                                 | PMID:33502487 | Bellan             | 2021 | Inpatient; mean of 105.0 days post discharge           | 12/238    | 5.00%   |
| Ageusia      | HP:0041051 | Ageusia                                                              | PMID:33502487 | Bellan             | 2021 | Inpatient; mean of 105.0 days post discharge           | 12/238    | 5.00%   |
| Ageusia      | HP:0041051 | Anosmia/ageusia                                                      | PMID:33031948 | Carvalho-Schneider | 2021 | Mixed; mean of 60.0 days post diagnosis                | 29/130    | 22.30%  |
| Ageusia      | HP:0041051 | Anosmia/ageusia                                                      | PMID:33031948 | Carvalho-Schneider | 2021 | Mixed; mean of 30.0 days post diagnosis                | 40/150    | 26.70%  |
| Ageusia      | HP:0041051 | Continued loss of taste and/or smell                                 | PMID:33175566 | Chopra             | 2020 | Inpatient; mean of 60.0 days post discharge            | 64/488    | 13.10%  |
| Ageusia      | HP:0041051 | Loss of Taste                                                        | PMID:33120193 | Daher              | 2020 | Inpatient (ICU); mean of 56.0 days post discharge      | 3/33      | 9.10%   |
| Ageusia      | HP:0041051 | Ageusia                                                              | PMID:33657671 | Darley             | 2021 | Mixed; mean of 69.0 days post diagnosis                | 1/78      | 1.30%   |
| Ageusia      | HP:0041051 | Loss of taste                                                        | PMID:-1       | Davis              | 2020 | Mixed; mean of 114.5 days post diagnosis               | 1267/3762 | 33.70%  |
| Ageusia      | HP:0041051 | Ageusia                                                              | PMID:32853602 | Garrigues          | 2020 | Inpatient (non-ICU); mean of 110.9 days post discharge | 9/96      | 9.40%   |
| Ageusia      | HP:0041051 | Ageusia                                                              | PMID:32853602 | Garrigues          | 2020 | Inpatient (ICU); mean of 110.9 days post discharge     | 04/24/21  | 16.70%  |
| Ageusia      | HP:0041051 | Ageusia (11%)                                                        | PMID:33257910 | Goertz             | 2020 | Mixed; mean of 79.0 days post diagnosis                | 232/2113  | 11.00%  |
| Ageusia      | HP:0041051 | Ageusia                                                              | PMID:33825846 | Havervall          | 2021 | Outpatient; mean of 120.0 days post diagnosis          | 17/323    | 5.30%   |
| Ageusia      | HP:0041051 | Ageusia                                                              | PMID:33825846 | Havervall          | 2021 | Outpatient; mean of 60.0 days post diagnosis           | 25/323    | 7.70%   |
| Ageusia      | HP:0041051 | Ageusia                                                              | PMID:33825846 | Havervall          | 2021 | Outpatient; mean of 240.0 days post diagnosis          | 12/323    | 3.70%   |
| Ageusia      | HP:0041051 | Loss of smell and taste                                              | PMID:33680620 | Iqbal              | 2021 | Mixed; mean of 38.1 days post diagnosis                | 75/158    | 47.50%  |
| Ageusia      | HP:0041051 | Lack of taste                                                        | PMID:33306721 | Jacobs             | 2020 | Inpatient (non-ICU); mean of 35.0 days post discharge  | 18/183    | 9.80%   |
| Ageusia      | HP:0041051 | Loss of taste/smell                                                  | PMID:33624010 | Jacobson           | 2021 | Inpatient; mean of 119.3 days post discharge           | 02/22/21  | 9.10%   |
| Ageusia      | HP:0041051 | Loss of taste/smell                                                  | PMID:33624010 | Jacobson           | 2021 | Outpatient; mean of 119.3 days post diagnosis          | 23/96     | 24.00%  |
| Ageusia      | HP:0041051 | Loss of taste (Figure 1)                                             | PMID:33252665 | Petersen           | 2020 | Outpatient; mean of 99.0 days post diagnosis           | 27/180    | 15.00%  |
| Ageusia      | HP:0041051 | ageusia (13%)                                                        | PMID:33521308 | Rosales-Castillo   | 2021 | Inpatient; mean of 50.8 days post discharge            | 1/118     | 0.80%   |
| Ageusia      | HP:0041051 | Loss of taste                                                        | PMID:32730238 | Tenforde           | 2020 | Outpatient; mean of 17.5 days post diagnosis           | 63/274    | 23.00%  |
| Palpitations | HP:0001962 | Palpitations                                                         | PMID:33031948 | Carvalho-Schneider | 2021 | Mixed; mean of 60.0 days post diagnosis                | 14/130    | 10.80%  |
| Palpitations | HP:0001962 | Palpitations                                                         | PMID:33031948 | Carvalho-Schneider | 2021 | Mixed; mean of 30.0 days post diagnosis                | 9/150     | 6.00%   |
| Palpitations | HP:0001962 | Heart palpitations                                                   | PMID:-1       | Davis              | 2020 | Mixed; mean of 114.5 days post diagnosis               | 2534/3762 | 67.40%  |
| Palpitations | HP:0001962 | Heart palpitations (32%)                                             | PMID:33257910 | Goertz             | 2020 | Mixed; mean of 79.0 days post diagnosis                | 676/2113  | 32.00%  |
| Palpitations | HP:0001962 | Palpitations                                                         | PMID:33825846 | Havervall          | 2021 | Outpatient; mean of 120.0 days post diagnosis          | 7/323     | 2.20%   |
| Palpitations | HP:0001962 | Palpitations                                                         | PMID:33825846 | Havervall          | 2021 | Outpatient; mean of 60.0 days post diagnosis           | 8/323     | 2.50%   |
| Palpitations | HP:0001962 | Palpitations                                                         | PMID:33825846 | Havervall          | 2021 | Outpatient; mean of 240.0 days post diagnosis          | 2/323     | 0.60%   |
| Palpitations | HP:0001962 | Palpitations                                                         | PMID:33428867 | Huang              | 2021 | Inpatient; mean of 186.0 days post discharge           | 154/1655  | 9.30%   |
| Palpitations | HP:0001962 | Palpitations                                                         | PMID:33624010 | Jacobson           | 2021 | Inpatient; mean of 119.3 days post discharge           | 0/22      | 0.00%   |
| Palpitations | HP:0001962 | Palpitations                                                         | PMID:33624010 | Jacobson           | 2021 | Outpatient; mean of 119.3 days post diagnosis          | 7/96      | 7.30%   |
| Palpitations | HP:0001962 | Palpitations on exertion                                             | PMID:33289374 | Liang              | 2020 | Inpatient (non-ICU); mean of 90.0 days post discharge  | 47/76     | 61.80%  |
| Palpitations | HP:0001962 | heart palpitations                                                   | PMID:33205450 | Ludvigsson         | 2021 | Outpatient; mean of 210.0 days post diagnosis          | 05/05/21  | 100.00% |



SupplementalFile2

|                    |            |                                                                                                                                                                                                                                                                                                  |               |                   |      |                                                        |           |        |
|--------------------|------------|--------------------------------------------------------------------------------------------------------------------------------------------------------------------------------------------------------------------------------------------------------------------------------------------------|---------------|-------------------|------|--------------------------------------------------------|-----------|--------|
| Palpitations       | HP:0001962 | Palpitations 20%                                                                                                                                                                                                                                                                                 | PMID:33787016 | Prieto            | 2021 | Mixed; mean of 53.0 days post diagnosis                | 17/85     | 20.00% |
| Palpitations       | HP:0001962 | Palpitations                                                                                                                                                                                                                                                                                     | PMID:32730619 | Puntmann          | 2020 | Mixed; mean of 71.0 days post diagnosis                | 20/100    | 20.00% |
| Palpitations       | HP:0001962 | Palpitations                                                                                                                                                                                                                                                                                     | PMID:33654513 | Suárez-Robles     | 2020 | Inpatient; mean of 90.0 days post discharge            | 29/134    | 21.60% |
| Palpitations       | HP:0001962 | Palpitations                                                                                                                                                                                                                                                                                     | PMID:33461632 | Venturelli        | 2021 | Mixed; mean of 81.0 days post diagnosis                | 30/515    | 5.80%  |
| Palpitations       | HP:0001962 | Palpitations                                                                                                                                                                                                                                                                                     | PMID:33532720 | de Graaf          | 2021 | Inpatient (ICU); mean of 42.0 days post discharge      | 5/34      | 14.70% |
| Palpitations       | HP:0001962 | palpitations                                                                                                                                                                                                                                                                                     | PMID:33532720 | de Graaf          | 2021 | Inpatient (non-ICU); mean of 42.0 days post discharge  | 7/47      | 14.90% |
| Decreased DLCO     | HP:0045051 | DLCO < LLN, n (%)                                                                                                                                                                                                                                                                                | PMID:33872135 | Abdallah          | 2021 | Inpatient; mean of 102.3 days post discharge           | 17/25     | 68.00% |
| Decreased DLCO     | HP:0045051 | DLCO < LLN, n (%)                                                                                                                                                                                                                                                                                | PMID:33872135 | Abdallah          | 2021 | Outpatient; mean of 129.8 days post diagnosis          | 12/38     | 31.60% |
| Decreased DLCO     | HP:0045051 | Dlco was less than 80% of expected in 113 patients                                                                                                                                                                                                                                               | PMID:33502487 | Bellan            | 2021 | Inpatient; mean of 105.0 days post discharge           | 113/224   | 50.40% |
| Decreased DLCO     | HP:0045051 | Dlco was less than 80% of expected in 113 patients                                                                                                                                                                                                                                               | PMID:33502487 | Bellan            | 2021 | Inpatient; mean of 105.0 days post discharge           | 113/224   | 50.40% |
| Decreased DLCO     | HP:0045051 | DLCO <80                                                                                                                                                                                                                                                                                         | PMID:33662544 | Blanco            | 2021 | Inpatient; mean of 104.0 days post discharge           | 52/100    | 52.00% |
| Decreased DLCO     | HP:0045051 | Diffusion capacity for carbon monoxide was below the lower limit of normal in 11 patients (14%)                                                                                                                                                                                                  | PMID:33657671 | Darley            | 2021 | Mixed; mean of 69.0 days post diagnosis                | 11/65     | 16.90% |
| Decreased DLCO     | HP:0045051 | DLCO, mL/min/mm Hg < 80%                                                                                                                                                                                                                                                                         | PMID:33676998 | González          | 2021 | Inpatient (ICU); mean of 90.0 days post discharge      | 50/62     | 80.60% |
| Decreased DLCO     | HP:0045051 | DLCO <80%, % of predicted                                                                                                                                                                                                                                                                        | PMID:33428867 | Huang             | 2021 | Inpatient; mean of 186.0 days post discharge           | 114/334   | 34.10% |
| Decreased DLCO     | HP:0045051 | 15 (47%) had decreased DLCO levels                                                                                                                                                                                                                                                               | PMID:33289374 | Liang             | 2020 | Inpatient (non-ICU); mean of 90.0 days post discharge  | 15/76     | 19.70% |
| Decreased DLCO     | HP:0045051 | seven (26.92%) had reduced diffusion capacity                                                                                                                                                                                                                                                    | PMID:32835708 | Ramani            | 2021 | Inpatient (ICU); mean of 39.5 days post discharge      | 07/28/21  | 25.00% |
| Decreased DLCO     | HP:0045051 | DLCO <80% of predicted normal - no. (%)                                                                                                                                                                                                                                                          | PMID:33303539 | Sonnweber         | 2020 | Mixed; mean of 63.0 days post diagnosis                | 39/126    | 31.00% |
| Decreased DLCO     | HP:0045051 | DLCO <80% of predicted normal - no. (%)                                                                                                                                                                                                                                                          | PMID:33303539 | Sonnweber         | 2020 | Mixed; mean of 103.0 days post diagnosis               | 28/133    | 21.10% |
| Decreased DLCO     | HP:0045051 | DLCO <70%                                                                                                                                                                                                                                                                                        | PMID:33729425 | Writing Committee | 2021 | Inpatient (ICU); mean of 93.0 days post discharge      | 17/47     | 36.20% |
| Decreased DLCO     | HP:0045051 | DLCO <70%                                                                                                                                                                                                                                                                                        | PMID:33729425 | Writing Committee | 2021 | Inpatient (non-ICU); mean of 121.0 days post discharge | 16/105    | 15.20% |
| Decreased DLCO     | HP:0045051 | DLCO impaired group (Supplementary Table 5)                                                                                                                                                                                                                                                      | PMID:32838236 | Zhao              | 2020 | Inpatient; mean of 78.5 days post discharge            | 9/55      | 16.40% |
| Decreased DLCO     | HP:0045051 | DLCO<LLN, No. (%)                                                                                                                                                                                                                                                                                | PMID:33220049 | van den Borst     | 2020 | Inpatient (ICU); mean of 91.0 days post discharge      | 25/46     | 54.30% |
| Decreased DLCO     | HP:0045051 | DLCO<LLN, No. (%)                                                                                                                                                                                                                                                                                | PMID:33220049 | van den Borst     | 2020 | Outpatient; mean of 91.0 days post diagnosis           | 0/27      | 0.00%  |
| Decreased DLCO     | HP:0045051 | DLCO<LLN, No. (%)                                                                                                                                                                                                                                                                                | PMID:33220049 | van den Borst     | 2020 | Inpatient (non-ICU); mean of 91.0 days post discharge  | 16/51     | 31.40% |
| Nausea             | HP:0002018 | Nausea                                                                                                                                                                                                                                                                                           | PMID:33273026 | Arnold            | 2020 | Inpatient (ICU); mean of 84.0 days post discharge      | 0/18      | 0.00%  |
| Nausea             | HP:0002018 | Nausea                                                                                                                                                                                                                                                                                           | PMID:33273026 | Arnold            | 2020 | Inpatient (non-ICU); mean of 84.0 days post discharge  | 0/65      | 0.00%  |
| Nausea             | HP:0002018 | Nausea                                                                                                                                                                                                                                                                                           | PMID:33273026 | Arnold            | 2020 | Inpatient (non-ICU); mean of 84.0 days post discharge  | 0/27      | 0.00%  |
| Nausea             | HP:0002018 | Nausea                                                                                                                                                                                                                                                                                           | PMID:33564789 | Chun              | 2021 | Mixed; mean of 63.0 days post diagnosis                | 10/61     | 16.40% |
| Nausea             | HP:0002018 | Nausea                                                                                                                                                                                                                                                                                           | PMID:33120193 | Daher             | 2020 | Inpatient (ICU); mean of 56.0 days post discharge      | 2/33      | 6.10%  |
| Nausea             | HP:0002018 | Nausea/vomiting                                                                                                                                                                                                                                                                                  | PMID:33657671 | Darley            | 2021 | Mixed; mean of 69.0 days post diagnosis                | 3/78      | 3.80%  |
| Nausea             | HP:0002018 | Nausea                                                                                                                                                                                                                                                                                           | PMID:-1       | Davis             | 2020 | Mixed; mean of 114.5 days post diagnosis               | 1797/3762 | 47.80% |
| Nausea             | HP:0002018 | Nausea (12%)                                                                                                                                                                                                                                                                                     | PMID:33257910 | Goertz            | 2020 | Mixed; mean of 79.0 days post diagnosis                | 254/2113  | 12.00% |
| Nausea             | HP:0002018 | nausea                                                                                                                                                                                                                                                                                           | PMID:33755344 | Graham            | 2021 | Outpatient; mean of 141.0 days post diagnosis          | 12/100    | 12.00% |
| Nausea             | HP:0002018 | Nausea/vomiting/diarrhea                                                                                                                                                                                                                                                                         | PMID:33624010 | Jacobson          | 2021 | Inpatient; mean of 119.3 days post discharge           | 0/22      | 0.00%  |
| Nausea             | HP:0002018 | Nausea/vomiting/Diarrhea                                                                                                                                                                                                                                                                         | PMID:33624010 | Jacobson          | 2021 | Outpatient; mean of 119.3 days post diagnosis          | 8/96      | 8.30%  |
| Nausea             | HP:0002018 | Nausea                                                                                                                                                                                                                                                                                           | PMID:33606031 | Logue             | 2021 | Inpatient; mean of 169.0 days post discharge           | 0/16      | 0.00%  |
| Nausea             | HP:0002018 | Nausea                                                                                                                                                                                                                                                                                           | PMID:33606031 | Logue             | 2021 | Outpatient; mean of 169.0 days post diagnosis          | 4/161     | 2.50%  |
| Nausea             | HP:0002018 | Nausea (Figure 1)                                                                                                                                                                                                                                                                                | PMID:33252665 | Petersen          | 2020 | Outpatient; mean of 99.0 days post diagnosis           | 7/180     | 3.90%  |
| Nausea             | HP:0002018 | Vomiting/nausea                                                                                                                                                                                                                                                                                  | PMID:33273028 | Stavem            | 2020 | Outpatient; mean of 117.0 days post diagnosis          | 9/451     | 2.00%  |
| Nausea             | HP:0002018 | Nausea                                                                                                                                                                                                                                                                                           | PMID:32730238 | Tenforde          | 2020 | Outpatient; mean of 17.5 days post diagnosis           | 27/274    | 9.90%  |
| Difficulty walking | HP:0002355 | Some problems in walking plus Confined to bed                                                                                                                                                                                                                                                    | PMID:33113469 | Akter             | 2020 | Inpatient; mean of 28.0 days post discharge            | 124/734   | 16.90% |
| Difficulty walking | HP:0002355 | 53 patients (22.3%) were found to have limited mobility based on SPPB test results.                                                                                                                                                                                                              | PMID:33502487 | Bellan            | 2021 | Inpatient; mean of 105.0 days post discharge           | 128/238   | 53.80% |
| Difficulty walking | HP:0002355 | 53 patients (22.3%) were found to have limited mobility based on SPPB test results. All other patients underwent a 2-minute walk test, which revealed a subtler impairment in 75 patients (31.5%). By this method, we identified 128 patients (53.8%) with some degree of functional impairment. | PMID:33502487 | Bellan            | 2021 | Inpatient; mean of 105.0 days post discharge           | 128/238   | 53.80% |
| Difficulty walking | HP:0002355 | inability to walk                                                                                                                                                                                                                                                                                | PMID:33785495 | Dennis            | 2021 | Inpatient; mean of 138.0 days post discharge           | 22/37     | 59.50% |
| Difficulty walking | HP:0002355 | inability to walk                                                                                                                                                                                                                                                                                | PMID:33785495 | Dennis            | 2021 | Outpatient; mean of 141.0 days post diagnosis          | 58/163    | 35.60% |
| Difficulty walking | HP:0002355 | Distance walked in 6 min, m. Less than lower limit of thenormal range                                                                                                                                                                                                                            | PMID:33428867 | Huang             | 2021 | Inpatient; mean of 186.0 days post discharge           | 392/1692  | 23.20% |
| Difficulty walking | HP:0002355 | After recovery, were you able to walk about? (Not normal)                                                                                                                                                                                                                                        | PMID:33680620 | Iqbal             | 2021 | Mixed; mean of 38.1 days post diagnosis                | 79/158    | 50.00% |
| Difficulty walking | HP:0002355 | Some/much difficulty walking                                                                                                                                                                                                                                                                     | PMID:33306721 | Jacobs            | 2020 | Inpatient (non-ICU); mean of 35.0 days post discharge  | 27/183    | 14.80% |
| Difficulty walking | HP:0002355 | Walking disturbances                                                                                                                                                                                                                                                                             | PMID:33654513 | Suárez-Robles     | 2020 | Inpatient; mean of 90.0 days post discharge            | 5/134     | 3.70%  |
| Difficulty walking | HP:0002355 | Mobility, some problems                                                                                                                                                                                                                                                                          | PMID:33413976 | Taboada           | 2021 | Inpatient (ICU); mean of 180.0 days post discharge     | 51/91     | 56.00% |
| Difficulty walking | HP:0002355 | 6MWD <80%predicted.No. (%)                                                                                                                                                                                                                                                                       | PMID:33220049 | van den Borst     | 2020 | Inpatient (ICU); mean of 91.0 days post discharge      | 9/46      | 19.60% |
| Difficulty walking | HP:0002355 | 6MWD <80%predicted.No. (%)                                                                                                                                                                                                                                                                       | PMID:33220049 | van den Borst     | 2020 | Outpatient; mean of 91.0 days post diagnosis           | 03/27/21  | 11.10% |
| Difficulty walking | HP:0002355 | 6MWD <80%predicted.No. (%)                                                                                                                                                                                                                                                                       | PMID:33220049 | van den Borst     | 2020 | Inpatient (non-ICU); mean of 91.0 days post discharge  | 13/51     | 25.50% |
| Memory impairment  | HP:0002354 | Memory loss                                                                                                                                                                                                                                                                                      | PMID:33113469 | Akter             | 2020 | Inpatient; mean of 28.0 days post discharge            | 141/734   | 19.20% |
| Memory impairment  | HP:0002354 | memory impairment (6%)                                                                                                                                                                                                                                                                           | PMID:33731329 | Cheng             | 2021 | Mixed; mean of 63.0 days post diagnosis                | 7/113     | 6.20%  |

SupplementalFile2

|                              |            |                                                                                                                                                                                                                                 |               |                   |      |                                                        |           |        |
|------------------------------|------------|---------------------------------------------------------------------------------------------------------------------------------------------------------------------------------------------------------------------------------|---------------|-------------------|------|--------------------------------------------------------|-----------|--------|
| Memory impairment            | HP:0002354 | Memory loss                                                                                                                                                                                                                     | PMID:32853602 | Garrigues         | 2020 | Inpatient (non-ICU); mean of 110.9 days post discharge | 36/96     | 37.50% |
| Memory impairment            | HP:0002354 | Memory loss                                                                                                                                                                                                                     | PMID:32853602 | Garrigues         | 2020 | Inpatient (ICU); mean of 110.9 days post discharge     | 05/24/21  | 20.80% |
| Memory impairment            | HP:0002354 | Memory impairment                                                                                                                                                                                                               | PMID:33825846 | Havervall         | 2021 | Outpatient; mean of 120.0 days post diagnosis          | 4/323     | 1.20%  |
| Memory impairment            | HP:0002354 | Memory impairment                                                                                                                                                                                                               | PMID:33825846 | Havervall         | 2021 | Outpatient; mean of 60.0 days post diagnosis           | 5/323     | 1.50%  |
| Memory impairment            | HP:0002354 | Memory impairment                                                                                                                                                                                                               | PMID:33825846 | Havervall         | 2021 | Outpatient; mean of 240.0 days post diagnosis          | 1/323     | 0.30%  |
| Memory impairment            | HP:0002354 | Memory problems                                                                                                                                                                                                                 | PMID:33624010 | Jacobson          | 2021 | Inpatient; mean of 119.3 days post discharge           | 05/22/21  | 22.70% |
| Memory impairment            | HP:0002354 | Memory problems                                                                                                                                                                                                                 | PMID:33624010 | Jacobson          | 2021 | Outpatient; mean of 119.3 days post diagnosis          | 15/96     | 15.60% |
| Memory impairment            | HP:0002354 | memory loss                                                                                                                                                                                                                     | PMID:33205450 | Ludvigsson        | 2021 | Outpatient; mean of 210.0 days post diagnosis          | 03/05/21  | 60.00% |
| Memory impairment            | HP:0002354 | Mnesic complaints                                                                                                                                                                                                               | PMID:33450302 | Moreno-Perez      | 2021 | Mixed; mean of 77.0 days post diagnosis                | 42/277    | 15.20% |
| Memory impairment            | HP:0002354 | Memory difficulties                                                                                                                                                                                                             | PMID:33729425 | Writing Committee | 2021 | Inpatient (ICU); mean of 93.0 days post discharge      | 10/62     | 16.10% |
| Memory impairment            | HP:0002354 | Memory difficulties                                                                                                                                                                                                             | PMID:33729425 | Writing Committee | 2021 | Inpatient (non-ICU); mean of 121.0 days post discharge | 63/354    | 17.80% |
| Cognitive impairment         | HP:0100543 | Cognitive disorders                                                                                                                                                                                                             | PMID:33120193 | Daher             | 2020 | Inpatient (ICU); mean of 56.0 days post discharge      | 6/33      | 18.20% |
| Cognitive impairment         | HP:0100543 | Five patients had mild and three had moderate cognitive impairment                                                                                                                                                              | PMID:33657671 | Darley            | 2021 | Mixed; mean of 69.0 days post diagnosis                | 8/78      | 10.30% |
| Cognitive impairment         | HP:0100543 | Difficulty thinking                                                                                                                                                                                                             | PMID:-1       | Davis             | 2020 | Mixed; mean of 114.5 days post diagnosis               | 2444/3762 | 65.00% |
| Cognitive impairment         | HP:0100543 | Cognitive impairment                                                                                                                                                                                                            | PMID:33052920 | De Lorenzo        | 2020 | Inpatient; mean of 21.5 days post discharge            | 36/126    | 28.60% |
| Cognitive impairment         | HP:0100543 | Cognitive impairment                                                                                                                                                                                                            | PMID:33052920 | De Lorenzo        | 2020 | Outpatient; mean of 26.0 days post diagnosis           | 11/59     | 18.60% |
| Cognitive impairment         | HP:0100543 | Assessment of mild cognitive impairment was more frequent according to MOCA (n = 16 [57.14%]) but not according to the Quality of Life in Neurological Disorders (n = 6 [22%]) score                                            | PMID:32835708 | Ramani            | 2021 | Inpatient (ICU); mean of 39.5 days post discharge      | 06/28/21  | 21.40% |
| Cognitive impairment         | HP:0100543 | Cognitive impairment                                                                                                                                                                                                            | PMID:33729425 | Writing Committee | 2021 | Inpatient (ICU); mean of 93.0 days post discharge      | 21/50     | 42.00% |
| Cognitive impairment         | HP:0100543 | Cognitive impairment (impairment of either MoCA or d2-R score)                                                                                                                                                                  | PMID:33729425 | Writing Committee | 2021 | Inpatient (non-ICU); mean of 121.0 days post discharge | 40/109    | 36.70% |
| Cognitive impairment         | HP:0100543 | Cognitive Failures (CFQ-25 > 31-8)                                                                                                                                                                                              | PMID:33532720 | de Graaf          | 2021 | Inpatient (ICU); mean of 42.0 days post discharge      | 6/34      | 17.60% |
| Cognitive impairment         | HP:0100543 | Cognitive Failures (CFQ-25 > 31-8)                                                                                                                                                                                              | PMID:33532720 | de Graaf          | 2021 | Inpatient (non-ICU); mean of 42.0 days post discharge  | 07/28/21  | 25.00% |
| Cognitive impairment         | HP:0100543 | TICS <34, No. (%)                                                                                                                                                                                                               | PMID:33220049 | van den Borst     | 2020 | Inpatient (ICU); mean of 91.0 days post discharge      | 7/46      | 15.20% |
| Cognitive impairment         | HP:0100543 | TICS <34, No. (%)                                                                                                                                                                                                               | PMID:33220049 | van den Borst     | 2020 | Outpatient; mean of 91.0 days post diagnosis           | 03/27/21  | 11.10% |
| Cognitive impairment         | HP:0100543 | TICS <34, No. (%)                                                                                                                                                                                                               | PMID:33220049 | van den Borst     | 2020 | Inpatient (non-ICU); mean of 91.0 days post discharge  | 9/51      | 17.60% |
| Ground-glass opacification   | HP:0025179 | Chest CT scan Ground-glass                                                                                                                                                                                                      | PMID:33676998 | González          | 2021 | Inpatient (ICU); mean of 90.0 days post discharge      | 34/57     | 59.60% |
| Ground-glass opacification   | HP:0025179 | GGO                                                                                                                                                                                                                             | PMID:33428867 | Huang             | 2021 | Inpatient; mean of 186.0 days post discharge           | 158/348   | 45.40% |
| Ground-glass opacification   | HP:0025179 | five patients showed abnormalities on the HRCT imaging, including two patients with local ground-glass opacification (GGO) and three patients with both local GGO and fibrosis.                                                 | PMID:33289374 | Liang             | 2020 | Inpatient (non-ICU); mean of 90.0 days post discharge  | 05/21/21  | 23.80% |
| Ground-glass opacification   | HP:0025179 | GGO and multiple GCOs                                                                                                                                                                                                           | PMID:32692945 | Liu               | 2020 | Inpatient; mean of 28.0 days post discharge            | 17/51     | 33.30% |
| Ground-glass opacification   | HP:0025179 | Ground glass opacities                                                                                                                                                                                                          | PMID:33303539 | Sonnweber         | 2020 | Mixed; mean of 63.0 days post diagnosis                | 102/145   | 70.30% |
| Ground-glass opacification   | HP:0025179 | Persistent ground-glass opacities                                                                                                                                                                                               | PMID:33729425 | Writing Committee | 2021 | Inpatient (ICU); mean of 93.0 days post discharge      | 27/49     | 55.10% |
| Ground-glass opacification   | HP:0025179 | Persistent ground-glass opacities                                                                                                                                                                                               | PMID:33729425 | Writing Committee | 2021 | Inpatient (non-ICU); mean of 121.0 days post discharge | 45/121    | 37.20% |
| Ground-glass opacification   | HP:0025179 | Ground-glass opacity                                                                                                                                                                                                            | PMID:33540129 | Zhang             | 2021 | Inpatient; mean of 90.0 days post discharge            | 10/263    | 3.80%  |
| Ground-glass opacification   | HP:0025179 | Ground-glass opacity                                                                                                                                                                                                            | PMID:33540129 | Zhang             | 2021 | Inpatient; mean of 180.0 days post discharge           | 5/96      | 5.20%  |
| Ground-glass opacification   | HP:0025179 | Ground-glass opacity                                                                                                                                                                                                            | PMID:33540129 | Zhang             | 2021 | Inpatient; mean of 28.0 days post discharge            | 30/428    | 7.00%  |
| Ground-glass opacification   | HP:0025179 | Pure GGO                                                                                                                                                                                                                        | PMID:32838236 | Zhao              | 2020 | Inpatient; mean of 78.5 days post discharge            | 7/55      | 12.70% |
| Ground-glass opacification   | HP:0025179 | Ground-glass opacity                                                                                                                                                                                                            | PMID:33220049 | van den Borst     | 2020 | Inpatient (ICU); mean of 91.0 days post discharge      | 34/46     | 73.90% |
| Ground-glass opacification   | HP:0025179 | Ground-glass opacity                                                                                                                                                                                                            | PMID:33220049 | van den Borst     | 2020 | Inpatient (non-ICU); mean of 91.0 days post discharge  | 39/51     | 76.50% |
| Posttraumatic stress symptom | HP:0033676 | Results of the IES-R questionnaire were within reference ranges in 136 patients (57.1%), while in 61 patients (25.6%) had mild symptoms, 27 patients (11.3%) had moderate symptoms, and 14 patients (5.9%) had severe symptoms. | PMID:33502487 | Bellan            | 2021 | Inpatient; mean of 105.0 days post discharge           | 102/238   | 42.90% |
| Posttraumatic stress symptom | HP:0033676 | Posttraumatic stress symptoms were reported in a total of 41 patients (17.2%).                                                                                                                                                  | PMID:33502487 | Bellan            | 2021 | Inpatient; mean of 105.0 days post discharge           | 41/238    | 17.20% |
| Posttraumatic stress symptom | HP:0033676 | PTSD                                                                                                                                                                                                                            | PMID:33052920 | De Lorenzo        | 2020 | Inpatient; mean of 21.5 days post discharge            | 18/126    | 14.30% |
| Posttraumatic stress symptom | HP:0033676 | PTSD                                                                                                                                                                                                                            | PMID:33052920 | De Lorenzo        | 2020 | Outpatient; mean of 26.0 days post diagnosis           | 23/59     | 39.00% |
| Posttraumatic stress symptom | HP:0033676 | Any PTSD symptoms related to illness                                                                                                                                                                                            | PMID:32729939 | Halpin            | 2021 | Inpatient (ICU); mean of 48.0 days post discharge      | 15/32     | 46.90% |
| Posttraumatic stress symptom | HP:0033676 | Any PTSD symptoms related to illness                                                                                                                                                                                            | PMID:32729939 | Halpin            | 2021 | Inpatient (non-ICU); mean of 48.0 days post discharge  | 16/68     | 23.50% |
| Posttraumatic stress symptom | HP:0033676 | Symptoms of PTSD (PCL-5 score)                                                                                                                                                                                                  | PMID:33729425 | Writing Committee | 2021 | Inpatient (ICU); mean of 93.0 days post discharge      | 5/50      | 10.00% |
| Posttraumatic stress symptom | HP:0033676 | Symptoms of PTSD (PCL-5 score)                                                                                                                                                                                                  | PMID:33729425 | Writing Committee | 2021 | Inpatient (non-ICU); mean of 121.0 days post discharge | 19/119    | 16.00% |
| Posttraumatic stress symptom | HP:0033676 | PTSS (PCL-5 ≥ 38)                                                                                                                                                                                                               | PMID:33532720 | de Graaf          | 2021 | Inpatient (ICU); mean of 42.0 days post discharge      | 2/34      | 5.90%  |
| Posttraumatic stress symptom | HP:0033676 | PTSS (PCL-5 ≥ 38)                                                                                                                                                                                                               | PMID:33532720 | de Graaf          | 2021 | Inpatient (non-ICU); mean of 42.0 days post discharge  | 3/47      | 6.40%  |
| Posttraumatic stress symptom | HP:0033676 | PCL-5 >33, No. (%)                                                                                                                                                                                                              | PMID:33220049 | van den Borst     | 2020 | Inpatient (ICU); mean of 91.0 days post discharge      | 4/46      | 8.70%  |
| Posttraumatic stress symptom | HP:0033676 | PCL-5 >33, No. (%)                                                                                                                                                                                                              | PMID:33220049 | van den Borst     | 2020 | Outpatient; mean of 91.0 days post diagnosis           | 02/27/21  | 7.40%  |
| Posttraumatic stress symptom | HP:0033676 | PCL-5 >33, No. (%)                                                                                                                                                                                                              | PMID:33220049 | van den Borst     | 2020 | Inpatient (non-ICU); mean of 91.0 days post discharge  | 3/51      | 5.90%  |
| Vomiting                     | HP:0002013 | Emesis                                                                                                                                                                                                                          | PMID:33120193 | Daher             | 2020 | Inpatient (ICU); mean of 56.0 days post discharge      | 0/33      | 0.00%  |
| Vomiting                     | HP:0002013 | Nausea/vomiting                                                                                                                                                                                                                 | PMID:33657671 | Darley            | 2021 | Mixed; mean of 69.0 days post diagnosis                | 3/78      | 3.80%  |
| Vomiting                     | HP:0002013 | Vomiting                                                                                                                                                                                                                        | PMID:-1       | Davis             | 2020 | Mixed; mean of 114.5 days post diagnosis               | 539/3762  | 14.30% |

SupplementalFile2

|                                                |            |                                                                                                |               |                   |      |                                                        |           |        |
|------------------------------------------------|------------|------------------------------------------------------------------------------------------------|---------------|-------------------|------|--------------------------------------------------------|-----------|--------|
| Vomiting                                       | HP:0002013 | Vomiting (1%)                                                                                  | PMID:33257910 | Goertz            | 2020 | Mixed; mean of 79.0 days post diagnosis                | 21/2113   | 1.00%  |
| Vomiting                                       | HP:0002013 | vomiting                                                                                       | PMID:33755344 | Graham            | 2021 | Outpatient; mean of 141.0 days post diagnosis          | 2/100     | 2.00%  |
| Vomiting                                       | HP:0002013 | Diarrhoea or vomiting                                                                          | PMID:33428867 | Huang             | 2021 | Inpatient; mean of 186.0 days post discharge           | 80/1655   | 4.80%  |
| Vomiting                                       | HP:0002013 | Nausea/vomiting/diarrhea                                                                       | PMID:33624010 | Jacobson          | 2021 | Inpatient; mean of 119.3 days post discharge           | 0/22      | 0.00%  |
| Vomiting                                       | HP:0002013 | Nausea/vomiting/Diarrhea                                                                       | PMID:33624010 | Jacobson          | 2021 | Outpatient; mean of 119.3 days post diagnosis          | 8/96      | 8.30%  |
| Vomiting                                       | HP:0002013 | vomiting                                                                                       | PMID:33205450 | Ludvigsson        | 2021 | Outpatient; mean of 210.0 days post diagnosis          | 02/05/21  | 40.00% |
| Vomiting                                       | HP:0002013 | Diarrhea or vomiting                                                                           | PMID:33303539 | Sonnweber         | 2020 | Mixed; mean of 103.0 days post diagnosis               | 13/145    | 9.00%  |
| Vomiting                                       | HP:0002013 | Vomiting/nausea                                                                                | PMID:33273028 | Stavem            | 2020 | Outpatient; mean of 117.0 days post diagnosis          | 9/451     | 2.00%  |
| Vomiting                                       | HP:0002013 | Vomiting                                                                                       | PMID:32730238 | Tenforde          | 2020 | Outpatient; mean of 17.5 days post diagnosis           | 8/274     | 2.90%  |
| Insomnia                                       | HP:0100785 | Can't sleep                                                                                    | PMID:33113469 | Akter             | 2020 | Inpatient; mean of 28.0 days post discharge            | 65/734    | 8.90%  |
| Insomnia                                       | HP:0100785 | Insomnia                                                                                       | PMID:33273026 | Arnold            | 2020 | Inpatient (ICU); mean of 84.0 days post discharge      | 09/18/21  | 50.00% |
| Insomnia                                       | HP:0100785 | Insomnia                                                                                       | PMID:33273026 | Arnold            | 2020 | Inpatient (non-ICU); mean of 84.0 days post discharge  | 11/65     | 16.90% |
| Insomnia                                       | HP:0100785 | Insomnia                                                                                       | PMID:33273026 | Arnold            | 2020 | Inpatient (non-ICU); mean of 84.0 days post discharge  | 06/27/21  | 22.20% |
| Insomnia                                       | HP:0100785 | Insomnia                                                                                       | PMID:-1       | Davis             | 2020 | Mixed; mean of 114.5 days post diagnosis               | 2582/3762 | 68.60% |
| Insomnia                                       | HP:0100785 | Insomnia                                                                                       | PMID:33052920 | De Lorenzo        | 2020 | Inpatient; mean of 21.5 days post discharge            | 31/126    | 24.60% |
| Insomnia                                       | HP:0100785 | Insomnia                                                                                       | PMID:33052920 | De Lorenzo        | 2020 | Outpatient; mean of 26.0 days post diagnosis           | 20/59     | 33.90% |
| Insomnia                                       | HP:0100785 | Insomnia                                                                                       | PMID:33755344 | Graham            | 2021 | Outpatient; mean of 141.0 days post diagnosis          | 33/100    | 33.00% |
| Insomnia                                       | HP:0100785 | Five of 23 patients who completed the insomnia severity index had moderate to severe insomnia. | PMID:32835708 | Ramani            | 2021 | Inpatient (ICU); mean of 39.5 days post discharge      | 05/23/21  | 21.70% |
| Insomnia                                       | HP:0100785 | Insomnia                                                                                       | PMID:33413976 | Taboada           | 2021 | Inpatient (ICU); mean of 180.0 days post discharge     | 28/91     | 30.80% |
| Insomnia                                       | HP:0100785 | Insomnia (ISI score)                                                                           | PMID:33729425 | Writing Committee | 2021 | Inpatient (ICU); mean of 93.0 days post discharge      | 22/50     | 44.00% |
| Insomnia                                       | HP:0100785 | Insomnia (ISI score)                                                                           | PMID:33729425 | Writing Committee | 2021 | Inpatient (non-ICU); mean of 121.0 days post discharge | 68/118    | 57.60% |
| Reduced forced expiratory volume in one second | HP:0032342 | FEV1 <LLN, n (%)                                                                               | PMID:33872135 | Abdallah          | 2021 | Inpatient; mean of 102.3 days post discharge           | 04/25/21  | 16.00% |
| Reduced forced expiratory volume in one second | HP:0032342 | FEV1 <LLN, n (%)                                                                               | PMID:33872135 | Abdallah          | 2021 | Outpatient; mean of 129.8 days post diagnosis          | 4/38      | 10.50% |
| Reduced forced expiratory volume in one second | HP:0032342 | FEV1 >80%, n=92/100                                                                            | PMID:33662544 | Blanco            | 2021 | Inpatient; mean of 104.0 days post discharge           | 8/100     | 8.00%  |
| Reduced forced expiratory volume in one second | HP:0032342 | FEV1 < lower limit of normal                                                                   | PMID:33657671 | Darley            | 2021 | Mixed; mean of 69.0 days post diagnosis                | 5/65      | 7.70%  |
| Reduced forced expiratory volume in one second | HP:0032342 | FEV1 <80%, % of predicted                                                                      | PMID:33428867 | Huang             | 2021 | Inpatient; mean of 186.0 days post discharge           | 22/349    | 6.30%  |
| Reduced forced expiratory volume in one second | HP:0032342 | four (5%) had mild impairment of FEV1                                                          | PMID:33289374 | Liang             | 2020 | Inpatient (non-ICU); mean of 90.0 days post discharge  | 4/76      | 5.30%  |
| Reduced forced expiratory volume in one second | HP:0032342 | Abnormalities were noted in FEV1 % predicted in 6/56 (11%)                                     | PMID:33490928 | Ramani            | 2021 | Inpatient; mean of 48.0 days post discharge            | 6/56      | 10.70% |
| Reduced forced expiratory volume in one second | HP:0032342 | FVC <80% of predicted normal – no. (%)                                                         | PMID:33303539 | Sonnweber         | 2020 | Mixed; mean of 63.0 days post diagnosis                | 34/126    | 27.00% |
| Reduced forced expiratory volume in one second | HP:0032342 | FEV1 <80% of predicted normal – no. (%)                                                        | PMID:33303539 | Sonnweber         | 2020 | Mixed; mean of 103.0 days post diagnosis               | 30/133    | 22.60% |
| Reduced forced expiratory volume in one second | HP:0032342 | FEV1<LLN, No. (%)                                                                              | PMID:33220049 | van den Borst     | 2020 | Inpatient (ICU); mean of 91.0 days post discharge      | 4/46      | 8.70%  |
| Reduced forced expiratory volume in one second | HP:0032342 | FEV1<LLN, No. (%)                                                                              | PMID:33220049 | van den Borst     | 2020 | Outpatient; mean of 91.0 days post diagnosis           | 02/27/21  | 7.40%  |
| Reduced forced expiratory volume in one second | HP:0032342 | FEV1<LLN, No. (%)                                                                              | PMID:33220049 | van den Borst     | 2020 | Inpatient (non-ICU); mean of 91.0 days post discharge  | 6/51      | 11.80% |
| Sleep disturbance                              | HP:0002360 | Disturbance in sound sleep                                                                     | PMID:33113469 | Akter             | 2020 | Inpatient; mean of 28.0 days post discharge            | 145/734   | 19.80% |
| Sleep disturbance                              | HP:0002360 | Sleep disorder                                                                                 | PMID:32853602 | Garrigues         | 2020 | Inpatient (non-ICU); mean of 110.9 days post discharge | 29/96     | 30.20% |
| Sleep disturbance                              | HP:0002360 | Sleep disorder                                                                                 | PMID:32853602 | Garrigues         | 2020 | Inpatient (ICU); mean of 110.9 days post discharge     | 08/24/21  | 33.30% |
| Sleep disturbance                              | HP:0002360 | Sleeping disorder                                                                              | PMID:33825846 | Havervall         | 2021 | Outpatient; mean of 120.0 days post diagnosis          | 9/323     | 2.80%  |
| Sleep disturbance                              | HP:0002360 | Sleeping disorder                                                                              | PMID:33825846 | Havervall         | 2021 | Outpatient; mean of 60.0 days post diagnosis           | 10/323    | 3.10%  |
| Sleep disturbance                              | HP:0002360 | Sleeping disorder                                                                              | PMID:33825846 | Havervall         | 2021 | Outpatient; mean of 240.0 days post diagnosis          | 7/323     | 2.20%  |
| Sleep disturbance                              | HP:0002360 | Sleep difficulties                                                                             | PMID:33428867 | Huang             | 2021 | Inpatient; mean of 186.0 days post discharge           | 437/1655  | 26.40% |
| Sleep disturbance                              | HP:0002360 | Poor sleep quality                                                                             | PMID:33680620 | Iqbal             | 2021 | Mixed; mean of 38.1 days post diagnosis                | 89/158    | 56.30% |
| Sleep disturbance                              | HP:0002360 | sleep disorders                                                                                | PMID:33205450 | Ludvigsson        | 2021 | Outpatient; mean of 210.0 days post diagnosis          | 02/05/21  | 40.00% |
| Sleep disturbance                              | HP:0002360 | Sleep disorders                                                                                | PMID:33303539 | Sonnweber         | 2020 | Mixed; mean of 103.0 days post diagnosis               | 41/145    | 28.30% |
| Sleep disturbance                              | HP:0002360 | Somnipathy                                                                                     | PMID:32979574 | Xiong             | 2021 | Inpatient; mean of 97.0 days post discharge            | 95/538    | 17.70% |
| Rhinorrhoea                                    | HP:0031417 | Rhinorrhoea                                                                                    | PMID:33120193 | Daher             | 2020 | Inpatient (ICU); mean of 56.0 days post discharge      | 4/33      | 12.10% |
| Rhinorrhoea                                    | HP:0031417 | Rhinorrhoea                                                                                    | PMID:33657671 | Darley            | 2021 | Mixed; mean of 69.0 days post diagnosis                | 5/78      | 6.40%  |
| Rhinorrhoea                                    | HP:0031417 | Runny nose                                                                                     | PMID:-1       | Davis             | 2020 | Mixed; mean of 114.5 days post diagnosis               | 1102/3762 | 29.30% |
| Rhinorrhoea                                    | HP:0031417 | Runny nose                                                                                     | PMID:33785495 | Dennis            | 2021 | Inpatient; mean of 138.0 days post discharge           | 13/37     | 35.10% |
| Rhinorrhoea                                    | HP:0031417 | Runny nose                                                                                     | PMID:33785495 | Dennis            | 2021 | Outpatient; mean of 141.0 days post diagnosis          | 55/163    | 33.70% |

SupplementalFile2

|                                   |            |                                                                                                                                            |               |                    |      |                                                        |           |        |
|-----------------------------------|------------|--------------------------------------------------------------------------------------------------------------------------------------------|---------------|--------------------|------|--------------------------------------------------------|-----------|--------|
| Rhinorrhea                        | HP:0031417 | Congestion/rhinorrhea                                                                                                                      | PMID:33624010 | Jacobson           | 2021 | Inpatient; mean of 119.3 days post discharge           | 01/22/21  | 4.50%  |
| Rhinorrhea                        | HP:0031417 | Congestion/Rhinorrhea                                                                                                                      | PMID:33624010 | Jacobson           | 2021 | Outpatient; mean of 119.3 days post diagnosis          | 7/96      | 7.30%  |
| Rhinorrhea                        | HP:0031417 | Runny nose                                                                                                                                 | PMID:33606031 | Logue              | 2021 | Inpatient; mean of 169.0 days post discharge           | 0/16      | 0.00%  |
| Rhinorrhea                        | HP:0031417 | Runny nose                                                                                                                                 | PMID:33606031 | Logue              | 2021 | Outpatient; mean of 169.0 days post diagnosis          | 5/161     | 3.10%  |
| Rhinorrhea                        | HP:0031417 | Rhinorrhea (Figure 1)                                                                                                                      | PMID:33252665 | Petersen           | 2020 | Outpatient; mean of 99.0 days post diagnosis           | 16/180    | 8.90%  |
| Rhinorrhea                        | HP:0031417 | Runny nose                                                                                                                                 | PMID:33273028 | Stavem             | 2020 | Outpatient; mean of 117.0 days post diagnosis          | 18/451    | 4.00%  |
| Parageusia                        | HP:0031249 | Dysgeusia                                                                                                                                  | PMID:32644129 | Carfi              | 2020 | Inpatient; mean of 60.3 days post discharge            | 14/143    | 9.80%  |
| Parageusia                        | HP:0031249 | Dysgeusia                                                                                                                                  | PMID:33564789 | Chun               | 2021 | Mixed; mean of 63.0 days post diagnosis                | 10/61     | 16.40% |
| Parageusia                        | HP:0031249 | Altered sense of taste                                                                                                                     | PMID:-1       | Davis              | 2020 | Mixed; mean of 114.5 days post diagnosis               | 943/3762  | 25.10% |
| Parageusia                        | HP:0031249 | Dysgeusia                                                                                                                                  | PMID:33755344 | Graham             | 2021 | Outpatient; mean of 141.0 days post diagnosis          | 60/100    | 60.00% |
| Parageusia                        | HP:0031249 | Taste disorder                                                                                                                             | PMID:33428867 | Huang              | 2021 | Inpatient; mean of 186.0 days post discharge           | 120/1655  | 7.30%  |
| Parageusia                        | HP:0031249 | deranged smell and taste                                                                                                                   | PMID:33205450 | Ludvigsson         | 2021 | Outpatient; mean of 210.0 days post diagnosis          | 01/05/21  | 20.00% |
| Parageusia                        | HP:0031249 | Anosmia-dysgeusia                                                                                                                          | PMID:33450302 | Moreno-Perez       | 2021 | Mixed; mean of 77.0 days post diagnosis                | 59/277    | 21.30% |
| Parageusia                        | HP:0031249 | Disgeusia 15%                                                                                                                              | PMID:33787016 | Prieto             | 2021 | Mixed; mean of 53.0 days post diagnosis                | 13/85     | 15.30% |
| Parageusia                        | HP:0031249 | Loss/disturbance of taste                                                                                                                  | PMID:33273028 | Stavem             | 2020 | Outpatient; mean of 117.0 days post diagnosis          | 45/451    | 10.00% |
| Parageusia                        | HP:0031249 | Dysgeusia                                                                                                                                  | PMID:33654513 | Suárez-Robles      | 2020 | Inpatient; mean of 90.0 days post discharge            | 29/134    | 21.60% |
| Parageusia                        | HP:0031249 | Anosmia/Dysgeusia                                                                                                                          | PMID:33461632 | Venturelli         | 2021 | Mixed; mean of 81.0 days post diagnosis                | 23/515    | 4.50%  |
| Abdominal pain                    | HP:0002027 | Abdominal pain                                                                                                                             | PMID:33273026 | Arnold             | 2020 | Inpatient (ICU); mean of 84.0 days post discharge      | 0/18      | 0.00%  |
| Abdominal pain                    | HP:0002027 | Abdominal pain                                                                                                                             | PMID:33273026 | Arnold             | 2020 | Inpatient (non-ICU); mean of 84.0 days post discharge  | 1/65      | 1.50%  |
| Abdominal pain                    | HP:0002027 | Abdominal pain                                                                                                                             | PMID:33273026 | Arnold             | 2020 | Inpatient (non-ICU); mean of 84.0 days post discharge  | 01/27/21  | 3.70%  |
| Abdominal pain                    | HP:0002027 | Stomach pains                                                                                                                              | PMID:33120193 | Daher              | 2020 | Inpatient (ICU); mean of 56.0 days post discharge      | 1/33      | 3.00%  |
| Abdominal pain                    | HP:0002027 | Abdominal pain                                                                                                                             | PMID:-1       | Davis              | 2020 | Mixed; mean of 114.5 days post diagnosis               | 1492/3762 | 39.70% |
| Abdominal pain                    | HP:0002027 | Abdominal pain                                                                                                                             | PMID:33785495 | Dennis             | 2021 | Inpatient; mean of 138.0 days post discharge           | 17/37     | 45.90% |
| Abdominal pain                    | HP:0002027 | Abdominal pain                                                                                                                             | PMID:33785495 | Dennis             | 2021 | Outpatient; mean of 141.0 days post diagnosis          | 91/163    | 55.80% |
| Abdominal pain                    | HP:0002027 | abdominal pain                                                                                                                             | PMID:33205450 | Ludvigsson         | 2021 | Outpatient; mean of 210.0 days post diagnosis          | 03/05/21  | 60.00% |
| Abdominal pain                    | HP:0002027 | Abdominal pain                                                                                                                             | PMID:33273028 | Stavem             | 2020 | Outpatient; mean of 117.0 days post diagnosis          | 13/451    | 2.90%  |
| Abdominal pain                    | HP:0002027 | Abdominal pain                                                                                                                             | PMID:32730238 | Tenforde           | 2020 | Outpatient; mean of 17.5 days post diagnosis           | 44/274    | 16.10% |
| Vertigo                           | HP:0002321 | Vertigo                                                                                                                                    | PMID:32644129 | Carfi              | 2020 | Inpatient; mean of 60.3 days post discharge            | 7/143     | 4.90%  |
| Vertigo                           | HP:0002321 | Dizziness / vertigo / unsteadiness or balance issues                                                                                       | PMID:-1       | Davis              | 2020 | Mixed; mean of 114.5 days post diagnosis               | 2531/3762 | 67.30% |
| Vertigo                           | HP:0002321 | Dizziness (27%)                                                                                                                            | PMID:33257910 | Goertz             | 2020 | Mixed; mean of 79.0 days post diagnosis                | 571/2113  | 27.00% |
| Vertigo                           | HP:0002321 | Dizziness                                                                                                                                  | PMID:33755344 | Graham             | 2021 | Outpatient; mean of 141.0 days post diagnosis          | 47/100    | 47.00% |
| Vertigo                           | HP:0002321 | Dizziness                                                                                                                                  | PMID:33428867 | Huang              | 2021 | Inpatient; mean of 186.0 days post discharge           | 101/1655  | 6.10%  |
| Vertigo                           | HP:0002321 | dizziness                                                                                                                                  | PMID:33205450 | Ludvigsson         | 2021 | Outpatient; mean of 210.0 days post diagnosis          | 04/05/21  | 80.00% |
| Vertigo                           | HP:0002321 | Vertigo/dizziness/lightheadedness, self-reported                                                                                           | PMID:33682276 | Rass               | 2021 | Outpatient; mean of 90.0 days post diagnosis           | 2/32      | 6.30%  |
| Vertigo                           | HP:0002321 | Vertigo/dizziness/lightheadedness, self-reported                                                                                           | PMID:33682276 | Rass               | 2021 | Inpatient (non-ICU); mean of 90.0 days post discharge  | 5/72      | 6.90%  |
| Vertigo                           | HP:0002321 | Vertigo/dizziness/lightheadedness, self-reported                                                                                           | PMID:33682276 | Rass               | 2021 | Inpatient (ICU); mean of 90.0 days post discharge      | 2/31      | 6.50%  |
| Vertigo                           | HP:0002321 | Dizziness                                                                                                                                  | PMID:32979574 | Xiong              | 2021 | Inpatient; mean of 97.0 days post discharge            | 14/538    | 2.60%  |
| Reduced total lung capacity       | HP:0033169 | TLC <LLN, n (%)                                                                                                                            | PMID:33872135 | Abdallah           | 2021 | Inpatient; mean of 102.3 days post discharge           | 12/25/21  | 48.00% |
| Reduced total lung capacity       | HP:0033169 | TLC <LLN, n (%)                                                                                                                            | PMID:33872135 | Abdallah           | 2021 | Outpatient; mean of 129.8 days post diagnosis          | 3/38      | 7.90%  |
| Reduced total lung capacity       | HP:0033169 | In eight patients (12%), total lung capacity was abnormal (ie, below lower limit of normal)                                                | PMID:33657671 | Darley             | 2021 | Mixed; mean of 69.0 days post diagnosis                | 8/65      | 12.30% |
| Reduced total lung capacity       | HP:0033169 | TLC, <80%                                                                                                                                  | PMID:33676998 | González           | 2021 | Inpatient (ICU); mean of 90.0 days post discharge      | 23/62     | 37.10% |
| Reduced total lung capacity       | HP:0033169 | TLC <80%, % of predicted                                                                                                                   | PMID:33428867 | Huang              | 2021 | Inpatient; mean of 186.0 days post discharge           | 56/334    | 16.80% |
| Reduced total lung capacity       | HP:0033169 | TLC <80% of predicted normal – no. (%)                                                                                                     | PMID:33303539 | Sonnweber          | 2020 | Mixed; mean of 63.0 days post diagnosis                | 14/126    | 11.10% |
| Reduced total lung capacity       | HP:0033169 | TLC <80% of predicted normal – no. (%)                                                                                                     | PMID:33303539 | Sonnweber          | 2020 | Mixed; mean of 103.0 days post diagnosis               | 15/133    | 11.30% |
| Reduced total lung capacity       | HP:0033169 | TLC<LLN, No. (%)                                                                                                                           | PMID:33220049 | van den Borst      | 2020 | Inpatient (ICU); mean of 91.0 days post discharge      | 7/46      | 15.20% |
| Reduced total lung capacity       | HP:0033169 | TLC<LLN, No. (%)                                                                                                                           | PMID:33220049 | van den Borst      | 2020 | Outpatient; mean of 91.0 days post diagnosis           | 01/27/21  | 3.70%  |
| Reduced total lung capacity       | HP:0033169 | TLC<LLN, No. (%)                                                                                                                           | PMID:33220049 | van den Borst      | 2020 | Inpatient (non-ICU); mean of 91.0 days post discharge  | 7/51      | 13.70% |
| Occupational disability           | HP:0033695 | Sick leave                                                                                                                                 | PMID:33031948 | Carvalho-Schneider | 2021 | Mixed; mean of 60.0 days post diagnosis                | 14/130    | 10.80% |
| Occupational disability           | HP:0033695 | Sick leave                                                                                                                                 | PMID:33031948 | Carvalho-Schneider | 2021 | Mixed; mean of 30.0 days post diagnosis                | 26/150    | 17.30% |
| Occupational disability           | HP:0033695 | Of the 69 patients who worked prior to admission, 27 had not yet returned to work at 6 to 12 week review due to their symptoms (27/69=39%) | PMID:33731329 | Cheng              | 2021 | Mixed; mean of 63.0 days post diagnosis                | 27/69     | 39.10% |
| Occupational disability           | HP:0033695 | (not) able to return to work 60 d after discharge                                                                                          | PMID:33175566 | Chopra             | 2020 | Inpatient; mean of 60.0 days post discharge            | 78/195    | 40.00% |
| Occupational disability           | HP:0033695 | Complement of Returned to work/worked before hospitalization                                                                               | PMID:32853602 | Garrigues          | 2020 | Inpatient (non-ICU); mean of 110.9 days post discharge | 10/41     | 24.40% |
| Occupational disability           | HP:0033695 | Returned to work/worked before hospitalization                                                                                             | PMID:32853602 | Garrigues          | 2020 | Inpatient (ICU); mean of 110.9 days post discharge     | 08/15/21  | 53.30% |
| Occupational disability           | HP:0033695 | Any Work Impairment due to health                                                                                                          | PMID:33624010 | Jacobson           | 2021 | Inpatient; mean of 119.3 days post discharge           | 07/12/21  | 58.30% |
| Occupational disability           | HP:0033695 | Any Work Impairment due to health                                                                                                          | PMID:33624010 | Jacobson           | 2021 | Outpatient; mean of 119.3 days post diagnosis          | 21/96     | 21.90% |
| Occupational disability           | HP:0033695 | All 55 patients had returned to their original work.                                                                                       | PMID:32838236 | Zhao               | 2020 | Inpatient; mean of 78.5 days post discharge            | 0/55      | 0.00%  |
| Diminished ability to concentrate | HP:0031987 | Loss of concentration                                                                                                                      | PMID:33113469 | Akter              | 2020 | Inpatient; mean of 28.0 days post discharge            | 188/734   | 25.60% |
| Diminished ability to concentrate | HP:0031987 | Poor attention or concentration                                                                                                            | PMID:-1       | Davis              | 2020 | Mixed; mean of 114.5 days post diagnosis               | 2814/3762 | 74.80% |
| Diminished ability to concentrate | HP:0031987 | New or worsened concentration problem                                                                                                      | PMID:32729939 | Halpin             | 2021 | Inpatient (ICU); mean of 48.0 days post discharge      | 11/32     | 34.40% |

## SupplementalFile2

|                                   |            |                                                                           |               |                   |      |                                                        |           |        |
|-----------------------------------|------------|---------------------------------------------------------------------------|---------------|-------------------|------|--------------------------------------------------------|-----------|--------|
| Diminished ability to concentrate | HP:0031987 | New or worsened concentration problem                                     | PMID:32729939 | Halpin            | 2021 | Inpatient (non-ICU); mean of 48.0 days post discharge  | 11/68     | 16.20% |
| Diminished ability to concentrate | HP:0031987 | Concentration impairment                                                  | PMID:33825846 | Havervall         | 2021 | Outpatient; mean of 120.0 days post diagnosis          | 6/323     | 1.90%  |
| Diminished ability to concentrate | HP:0031987 | Concentration impairment                                                  | PMID:33825846 | Havervall         | 2021 | Outpatient; mean of 60.0 days post diagnosis           | 7/323     | 2.20%  |
| Diminished ability to concentrate | HP:0031987 | Concentration impairment                                                  | PMID:33825846 | Havervall         | 2021 | Outpatient; mean of 240.0 days post diagnosis          | 2/323     | 0.60%  |
| Diminished ability to concentrate | HP:0031987 | difficulties concentrating                                                | PMID:33205450 | Ludvigsson        | 2021 | Outpatient; mean of 210.0 days post diagnosis          | 04/05/21  | 80.00% |
| Diminished ability to concentrate | HP:0031987 | Concentration problems                                                    | PMID:33729425 | Writing Committee | 2021 | Inpatient (non-ICU); mean of 121.0 days post discharge | 35/351    | 10.00% |
| Alopecia                          | HP:0001596 | Hairfall                                                                  | PMID:33113469 | Akter             | 2020 | Inpatient; mean of 28.0 days post discharge            | 71/734    | 9.70%  |
| Alopecia                          | HP:0001596 | hair-loss (6%)                                                            | PMID:33731329 | Cheng             | 2021 | Mixed; mean of 63.0 days post diagnosis                | 7/113     | 6.20%  |
| Alopecia                          | HP:0001596 | Hair loss                                                                 | PMID:32853602 | Garrigues         | 2020 | Inpatient (non-ICU); mean of 110.9 days post discharge | 18/96     | 18.80% |
| Alopecia                          | HP:0001596 | Hair loss                                                                 | PMID:32853602 | Garrigues         | 2020 | Inpatient (ICU); mean of 110.9 days post discharge     | 06/24/21  | 25.00% |
| Alopecia                          | HP:0001596 | Hair loss                                                                 | PMID:33428867 | Huang             | 2021 | Inpatient; mean of 186.0 days post discharge           | 359/1655  | 21.70% |
| Alopecia                          | HP:0001596 | Hair fall                                                                 | PMID:33680620 | Iqbal             | 2021 | Mixed; mean of 38.1 days post diagnosis                | 63/158    | 39.90% |
| Alopecia                          | HP:0001596 | Hair loss                                                                 | PMID:33624010 | Jacobson          | 2021 | Inpatient; mean of 119.3 days post discharge           | 04/22/21  | 18.20% |
| Alopecia                          | HP:0001596 | Hair loss                                                                 | PMID:33624010 | Jacobson          | 2021 | Outpatient; mean of 119.3 days post diagnosis          | 10/96     | 10.40% |
| Alopecia                          | HP:0001596 | Alopecia                                                                  | PMID:32979574 | Xiong             | 2021 | Inpatient; mean of 97.0 days post discharge            | 154/538   | 28.60% |
| Parenchymal consolidation         | HP:0032177 | Chest CT scan Consolidation                                               | PMID:33676998 | González          | 2021 | Inpatient (ICU); mean of 90.0 days post discharge      | 9/57      | 15.80% |
| Parenchymal consolidation         | HP:0032177 | Chest CT/Consolidation                                                    | PMID:33428867 | Huang             | 2021 | Inpatient; mean of 186.0 days post discharge           | 4/161     | 2.50%  |
| Parenchymal consolidation         | HP:0032177 | Consolidation                                                             | PMID:32692945 | Liu               | 2020 | Inpatient; mean of 28.0 days post discharge            | 1/51      | 2.00%  |
| Parenchymal consolidation         | HP:0032177 | CT consolidations                                                         | PMID:33303539 | Sonnweber         | 2020 | Mixed; mean of 63.0 days post diagnosis                | 93/145    | 64.10% |
| Parenchymal consolidation         | HP:0032177 | CT: consolidations                                                        | PMID:33479105 | Trinkmann         | 2021 | Mixed; mean of 68.0 days post diagnosis                | 12/17/21  | 70.60% |
| Parenchymal consolidation         | HP:0032177 | Consolidation (CT)                                                        | PMID:33540129 | Zhang             | 2021 | Inpatient; mean of 90.0 days post discharge            | 47/263    | 17.90% |
| Parenchymal consolidation         | HP:0032177 | Consolidation (CT)                                                        | PMID:33540129 | Zhang             | 2021 | Inpatient; mean of 180.0 days post discharge           | 24/96     | 25.00% |
| Parenchymal consolidation         | HP:0032177 | Consolidation (CT)                                                        | PMID:33540129 | Zhang             | 2021 | Inpatient; mean of 28.0 days post discharge            | 48/428    | 11.20% |
| Pain                              | HP:0012531 | Pain/discomfort                                                           | PMID:33113469 | Akter             | 2020 | Inpatient; mean of 28.0 days post discharge            | 233/734   | 31.70% |
| Pain                              | HP:0012531 | Pain other than chest                                                     | PMID:33755344 | Graham            | 2021 | Outpatient; mean of 141.0 days post diagnosis          | 43/100    | 43.00% |
| Pain                              | HP:0012531 | Worsened pain/discomfort                                                  | PMID:32729939 | Halpin            | 2021 | Inpatient (ICU); mean of 48.0 days post discharge      | 9/32      | 28.10% |
| Pain                              | HP:0012531 | Worsened pain/discomfort                                                  | PMID:32729939 | Halpin            | 2021 | Inpatient (non-ICU); mean of 48.0 days post discharge  | 10/68     | 14.70% |
| Pain                              | HP:0012531 | Pain or discomfort                                                        | PMID:33428867 | Huang             | 2021 | Inpatient; mean of 186.0 days post discharge           | 431/1616  | 26.70% |
| Pain                              | HP:0012531 | After recovery, did you feel pain or discomfort?                          | PMID:33680620 | Iqbal             | 2021 | Mixed; mean of 38.1 days post diagnosis                | 117/158   | 74.10% |
| Pain                              | HP:0012531 | Pain                                                                      | PMID:33303539 | Sonnweber         | 2020 | Mixed; mean of 103.0 days post diagnosis               | 35/145    | 24.10% |
| Pain                              | HP:0012531 | Pain or discomfort: Some pain or discomfort or Extreme pain or discomfort | PMID:33413976 | Taboada           | 2021 | Inpatient (ICU); mean of 180.0 days post discharge     | 44/91     | 48.40% |
| Reduced forced vital capacity     | HP:0032341 | FVC <LLN, n (%)                                                           | PMID:33872135 | Abdallah          | 2021 | Inpatient; mean of 102.3 days post discharge           | 06/25/21  | 24.00% |
| Reduced forced vital capacity     | HP:0032341 | FVC <LLN, n (%)                                                           | PMID:33872135 | Abdallah          | 2021 | Outpatient; mean of 129.8 days post diagnosis          | 1/38      | 2.60%  |
| Reduced forced vital capacity     | HP:0032341 | FVC >80%, n=94/100                                                        | PMID:33662544 | Blanco            | 2021 | Inpatient; mean of 104.0 days post discharge           | 6/100     | 6.00%  |
| Reduced forced vital capacity     | HP:0032341 | FVC < lower limit of normal                                               | PMID:33657671 | Darley            | 2021 | Mixed; mean of 69.0 days post diagnosis                | 3/65      | 4.60%  |
| Reduced forced vital capacity     | HP:0032341 | FVC <80%, % of predicted                                                  | PMID:33428867 | Huang             | 2021 | Inpatient; mean of 186.0 days post discharge           | 14/349    | 4.00%  |
| Reduced forced vital capacity     | HP:0032341 | Abnormalities were noted in FVC % predicted in 7/56 (13%).                | PMID:33490928 | Ramani            | 2021 | Inpatient; mean of 48.0 days post discharge            | 7/56      | 12.50% |
| Reduced forced vital capacity     | HP:0032341 | FVC <80% of predicted normal – no. (%)                                    | PMID:33303539 | Sonnweber         | 2020 | Mixed; mean of 63.0 days post diagnosis                | 34/126    | 27.00% |
| Reduced forced vital capacity     | HP:0032341 | FVC <80% of predicted normal – no. (%)                                    | PMID:33303539 | Sonnweber         | 2020 | Mixed; mean of 103.0 days post diagnosis               | 29/133    | 21.80% |
| Chills                            | HP:0025143 | Fever/chills                                                              | PMID:33657671 | Darley            | 2021 | Mixed; mean of 69.0 days post diagnosis                | 5/78      | 6.40%  |
| Chills                            | HP:0025143 | Chills/flushing/sweats                                                    | PMID:1        | Davis             | 2020 | Mixed; mean of 114.5 days post diagnosis               | 2124/3762 | 56.50% |
| Chills                            | HP:0025143 | Chills or shivering                                                       | PMID:33606031 | Logue             | 2021 | Inpatient; mean of 169.0 days post discharge           | 01/16/21  | 6.30%  |
| Chills                            | HP:0025143 | Chills or shivering                                                       | PMID:33606031 | Logue             | 2021 | Outpatient; mean of 169.0 days post diagnosis          | 4/161     | 2.50%  |
| Chills                            | HP:0025143 | Chills                                                                    | PMID:33273028 | Stavem            | 2020 | Outpatient; mean of 117.0 days post diagnosis          | 5/451     | 1.10%  |
| Chills                            | HP:0025143 | Chills                                                                    | PMID:32730238 | Tenforde          | 2020 | Outpatient; mean of 17.5 days post diagnosis           | 14/274    | 5.10%  |
| Chills                            | HP:0025143 | Chills                                                                    | PMID:32979574 | Xiong             | 2021 | Inpatient; mean of 97.0 days post discharge            | 25/538    | 4.60%  |
| Oxygen desaturation on exertion   | HP:0030874 | Severe desaturation on STS test (1 minute Sit to Stand desaturation test) | PMID:33273026 | Arnold            | 2020 | Inpatient (ICU); mean of 84.0 days post discharge      | 05/18/21  | 27.80% |
| Oxygen desaturation on exertion   | HP:0030874 | Severe desaturation on STS test (1 minute Sit to Stand desaturation test) | PMID:33273026 | Arnold            | 2020 | Inpatient (non-ICU); mean of 84.0 days post discharge  | 10/65     | 15.40% |
| Oxygen desaturation on exertion   | HP:0030874 | Severe desaturation on STS test (1 minute Sit to Stand desaturation test) | PMID:33273026 | Arnold            | 2020 | Inpatient (non-ICU); mean of 84.0 days post discharge  | 0/27      | 0.00%  |
| Oxygen desaturation on exertion   | HP:0030874 | Four (7%) patients desaturated at the end of the test.                    | PMID:33490928 | Ramani            | 2021 | Inpatient; mean of 48.0 days post discharge            | 4/57      | 7.00%  |
| Oxygen desaturation on exertion   | HP:0030874 | Desaturation >=4% upon6MWT, No. (%)                                       | PMID:33220049 | van den Borst     | 2020 | Inpatient (ICU); mean of 91.0 days post discharge      | 8/46      | 17.40% |
| Oxygen desaturation on exertion   | HP:0030874 | Desaturation >=4% upon6MWT, No. (%)                                       | PMID:33220049 | van den Borst     | 2020 | Outpatient; mean of 91.0 days post diagnosis           | 01/27/21  | 3.70%  |
| Oxygen desaturation on exertion   | HP:0030874 | Desaturation >=4% upon6MWT, No. (%)                                       | PMID:33220049 | van den Borst     | 2020 | Inpatient (non-ICU); mean of 91.0 days post discharge  | 11/51     | 21.60% |
| Reduced FEV1/FVC ratio            | HP:0030877 | FEV1/FVC < LLN, n (%)                                                     | PMID:33872135 | Abdallah          | 2021 | Inpatient; mean of 102.3 days post discharge           | 01/25/21  | 4.00%  |
| Reduced FEV1/FVC ratio            | HP:0030877 | FEV1/FVC < LLN, n (%)                                                     | PMID:33872135 | Abdallah          | 2021 | Outpatient; mean of 129.8 days post diagnosis          | 6/38      | 15.80% |
| Reduced FEV1/FVC ratio            | HP:0030877 | FEV1/FVC <70%                                                             | PMID:33428867 | Huang             | 2021 | Inpatient; mean of 186.0 days post discharge           | 22/349    | 6.30%  |
| Reduced FEV1/FVC ratio            | HP:0030877 | 17 (22%) had mild impairment of FEV1/FVC                                  | PMID:33289374 | Liang             | 2020 | Inpatient (non-ICU); mean of 90.0 days post discharge  | 17/76     | 22.40% |
| Reduced FEV1/FVC ratio            | HP:0030877 | Obstruction was considered as FEV1/FVC <0.7                               | PMID:33450302 | Moreno-Perez      | 2021 | Mixed; mean of 77.0 days post diagnosis                | 34/269    | 12.60% |

SupplementalFile2

|                                            |            |                                                                                                                                        |               |                    |      |                                                       |           |        |
|--------------------------------------------|------------|----------------------------------------------------------------------------------------------------------------------------------------|---------------|--------------------|------|-------------------------------------------------------|-----------|--------|
| Reduced FEV1/FVC ratio                     | HP:0030877 | FEV1:FVC <70% – no. (%)                                                                                                                | PMID:33303539 | Sonnweber          | 2020 | Mixed; mean of 63.0 days post diagnosis               | 5/126     | 4.00%  |
| Reduced FEV1/FVC ratio                     | HP:0030877 | FEV1:FVC <70% – no. (%)                                                                                                                | PMID:33303539 | Sonnweber          | 2020 | Mixed; mean of 103.0 days post diagnosis              | 11/133    | 8.30%  |
| Dysphagia                                  | HP:0002015 | Lump in throat/difficulty swallowing                                                                                                   | PMID:-1       | Davis              | 2020 | Mixed; mean of 114.5 days post diagnosis              | 1222/3762 | 32.50% |
| Dysphagia                                  | HP:0002015 | Dysphagia                                                                                                                              | PMID:33755344 | Graham             | 2021 | Outpatient; mean of 141.0 days post diagnosis         | 1/100     | 1.00%  |
| Dysphagia                                  | HP:0002015 | Swallow problem                                                                                                                        | PMID:32729939 | Halpin             | 2021 | Inpatient (ICU); mean of 48.0 days post discharge     | 4/32      | 12.50% |
| Dysphagia                                  | HP:0002015 | Swallow problem                                                                                                                        | PMID:32729939 | Halpin             | 2021 | Inpatient (non-ICU); mean of 48.0 days post discharge | 4/68      | 5.90%  |
| Dysphagia                                  | HP:0002015 | Dysphagia                                                                                                                              | PMID:33682276 | Rass               | 2021 | Outpatient; mean of 90.0 days post diagnosis          | 0/32      | 0.00%  |
| Dysphagia                                  | HP:0002015 | Dysphagia                                                                                                                              | PMID:33682276 | Rass               | 2021 | Inpatient (non-ICU); mean of 90.0 days post discharge | 0/72      | 0.00%  |
| Dysphagia                                  | HP:0002015 | Dysphagia                                                                                                                              | PMID:33682276 | Rass               | 2021 | Inpatient (ICU); mean of 90.0 days post discharge     | 0/31      | 0.00%  |
| Impairment of activities of daily living   | HP:0031058 | Unable to wash or dress myself and Some problem in washing or dressing                                                                 | PMID:33113469 | Akter              | 2020 | Inpatient; mean of 28.0 days post discharge           | 70/734    | 9.50%  |
| Impairment of activities of daily living   | HP:0031058 | 29 showing both an SPPB score ≤10 and 1-MSTST repetitions lower than expectancy                                                        | PMID:33565741 | Baricich           | 2021 | Inpatient; mean of 124.7 days post discharge          | 29/204    | 14.20% |
| Impairment of activities of daily living   | HP:0031058 | After recovery, were you able to carry out your usual activities? (business, office work, study, housework or leisure activities)      | PMID:33680620 | Iqbal              | 2021 | Mixed; mean of 38.1 days post diagnosis               | 125/158   | 79.10% |
| Impairment of activities of daily living   | HP:0031058 | Any Activity impairment due to health                                                                                                  | PMID:33624010 | Jacobson           | 2021 | Inpatient; mean of 119.3 days post discharge          | 14/19     | 73.70% |
| Impairment of activities of daily living   | HP:0031058 | Any Activity impairment due to health                                                                                                  | PMID:33624010 | Jacobson           | 2021 | Outpatient; mean of 119.3 days post diagnosis         | 40/87     | 46.00% |
| Impairment of activities of daily living   | HP:0031058 | All but one patient (96%) performed activities of daily life without difficulty.                                                       | PMID:32835708 | Ramani             | 2021 | Inpatient (ICU); mean of 39.5 days post discharge     | 01/28/21  | 3.60%  |
| Impairment of activities of daily living   | HP:0031058 | Usual activities, some problems or unable to perform                                                                                   | PMID:33413976 | Taboada            | 2021 | Inpatient (ICU); mean of 180.0 days post discharge    | 34/91     | 37.40% |
| Skin rash                                  | HP:0000988 | Skin rashes                                                                                                                            | PMID:-1       | Davis              | 2020 | Mixed; mean of 114.5 days post diagnosis              | 1045/3762 | 27.80% |
| Skin rash                                  | HP:0000988 | Skin rash                                                                                                                              | PMID:33428867 | Huang              | 2021 | Inpatient; mean of 186.0 days post discharge          | 47/1655   | 2.80%  |
| Skin rash                                  | HP:0000988 | Rash                                                                                                                                   | PMID:33606031 | Logue              | 2021 | Inpatient; mean of 169.0 days post discharge          | 0/16      | 0.00%  |
| Skin rash                                  | HP:0000988 | Rash                                                                                                                                   | PMID:33606031 | Logue              | 2021 | Outpatient; mean of 169.0 days post diagnosis         | 3/161     | 1.90%  |
| Skin rash                                  | HP:0000988 | skin rashes                                                                                                                            | PMID:33205450 | Ludvigsson         | 2021 | Outpatient; mean of 210.0 days post diagnosis         | 03/05/21  | 60.00% |
| Skin rash                                  | HP:0000988 | Rashes (Figure 1)                                                                                                                      | PMID:33252665 | Petersen           | 2020 | Outpatient; mean of 99.0 days post diagnosis          | 5/180     | 2.80%  |
| Skin rash                                  | HP:0000988 | Skin rash                                                                                                                              | PMID:33273028 | Stavem             | 2020 | Outpatient; mean of 117.0 days post diagnosis         | 9/451     | 2.00%  |
| Blurred vision                             | HP:0000622 | Blurred vision                                                                                                                         | PMID:-1       | Davis              | 2020 | Mixed; mean of 114.5 days post diagnosis              | 1343/3762 | 35.70% |
| Blurred vision                             | HP:0000622 | Blurred vision                                                                                                                         | PMID:33755344 | Graham             | 2021 | Outpatient; mean of 141.0 days post diagnosis         | 30/100    | 30.00% |
| Blurred vision                             | HP:0000622 | Blurred vision                                                                                                                         | PMID:33680620 | Iqbal              | 2021 | Mixed; mean of 38.1 days post diagnosis               | 30/158    | 19.00% |
| Blurred vision                             | HP:0000622 | Blurring vision, selfreported                                                                                                          | PMID:33682276 | Rass               | 2021 | Outpatient; mean of 90.0 days post diagnosis          | 1/32      | 3.10%  |
| Blurred vision                             | HP:0000622 | Blurring vision, selfreported                                                                                                          | PMID:33682276 | Rass               | 2021 | Inpatient (non-ICU); mean of 90.0 days post discharge | 7/72      | 9.70%  |
| Blurred vision                             | HP:0000622 | Blurring vision, selfreported                                                                                                          | PMID:33682276 | Rass               | 2021 | Inpatient (ICU); mean of 90.0 days post discharge     | 01/31/21  | 3.20%  |
| Blurred vision                             | HP:0000622 | Vision disturbance/blurring                                                                                                            | PMID:33273028 | Stavem             | 2020 | Outpatient; mean of 117.0 days post diagnosis         | 18/451    | 4.00%  |
| Increased sputum production                | HP:0033709 | Sputum production                                                                                                                      | PMID:32644129 | Carfi              | 2020 | Inpatient; mean of 60.3 days post discharge           | 12/143    | 8.40%  |
| Increased sputum production                | HP:0033709 | mucus (18%)                                                                                                                            | PMID:33257910 | Goertz             | 2020 | Mixed; mean of 79.0 days post diagnosis               | 254/2113  | 12.00% |
| Increased sputum production                | HP:0033709 | Phlegm                                                                                                                                 | PMID:33306721 | Jacobs             | 2020 | Inpatient (non-ICU); mean of 35.0 days post discharge | 27/183    | 14.80% |
| Increased sputum production                | HP:0033709 | Sputum                                                                                                                                 | PMID:33289374 | Liang              | 2020 | Inpatient (non-ICU); mean of 90.0 days post discharge | 33/76     | 43.40% |
| Increased sputum production                | HP:0033709 | Sputum                                                                                                                                 | PMID:32692945 | Liu                | 2020 | Inpatient; mean of 28.0 days post discharge           | 2/51      | 3.90%  |
| Increased sputum production                | HP:0033709 | Sputum                                                                                                                                 | PMID:33654513 | Suárez-Robles      | 2020 | Inpatient; mean of 90.0 days post discharge           | 7/134     | 5.20%  |
| Increased sputum production                | HP:0033709 | Sputum                                                                                                                                 | PMID:32979574 | Xiong              | 2021 | Inpatient; mean of 97.0 days post discharge           | 16/538    | 3.00%  |
| Chest tightness                            | HP:0031352 | Shortness of breath/chest tightness/wheezing                                                                                           | PMID:33175566 | Chopra             | 2020 | Inpatient; mean of 60.0 days post discharge           | 81/488    | 16.60% |
| Chest tightness                            | HP:0031352 | chest tightness (14)                                                                                                                   | PMID:33657671 | Darley             | 2021 | Mixed; mean of 69.0 days post diagnosis               | 14/78     | 17.90% |
| Chest tightness                            | HP:0031352 | Tightness of Chest                                                                                                                     | PMID:-1       | Davis              | 2020 | Mixed; mean of 114.5 days post diagnosis              | 2813/3762 | 74.80% |
| Chest tightness                            | HP:0031352 | Chest tightness (44%)                                                                                                                  | PMID:33257910 | Goertz             | 2020 | Mixed; mean of 79.0 days post diagnosis               | 930/2113  | 44.00% |
| Chest tightness                            | HP:0031352 | Chest tightness on exertion                                                                                                            | PMID:33289374 | Liang              | 2020 | Inpatient (non-ICU); mean of 90.0 days post discharge | 47/76     | 61.80% |
| Chest tightness                            | HP:0031352 | Chest tightness (Figure 1)                                                                                                             | PMID:33252665 | Petersen           | 2020 | Outpatient; mean of 99.0 days post diagnosis          | 11/180    | 6.10%  |
| Chest tightness                            | HP:0031352 | Chest distress                                                                                                                         | PMID:32979574 | Xiong              | 2021 | Inpatient; mean of 97.0 days post discharge           | 76/538    | 14.10% |
| Elevated circulating D-dimer concentration | HP:0033106 | D-dimer abnormal                                                                                                                       | PMID:33755344 | Graham             | 2021 | Outpatient; mean of 141.0 days post diagnosis         | 08/27/21  | 29.60% |
| Elevated circulating D-dimer concentration | HP:0033106 | 30.1% (of 176) had persistently elevated d-dimer concentration                                                                         | PMID:33172844 | Mandal             | 2020 | Inpatient; mean of 54.0 days post discharge           | 53/176    | 30.10% |
| Elevated circulating D-dimer concentration | HP:0033106 | D-dimers > 0.5 mg/mL                                                                                                                   | PMID:33450302 | Moreno-Perez       | 2021 | Mixed; mean of 77.0 days post diagnosis               | 68/273    | 24.90% |
| Elevated circulating D-dimer concentration | HP:0033106 | D-dimer, NT-proBNP, and serum ferritin were still elevated in 27%, 23%, and 17% of COVID-19 patients at second follow-up, respectively | PMID:33303539 | Sonnweber          | 2020 | Mixed; mean of 103.0 days post diagnosis              | 36/135    | 26.70% |
| Elevated circulating D-dimer concentration | HP:0033106 | elevated D-dimer levels were observed in 38 (25.3%) patients at time of follow-up                                                      | PMID:33587810 | Townsend           | 2021 | Mixed; mean of 80.5 days post diagnosis               | 38/150    | 25.30% |
| Elevated circulating D-dimer concentration | HP:0033106 | D-dimer ≥2000                                                                                                                          | PMID:33461632 | Venturelli         | 2021 | Mixed; mean of 81.0 days post diagnosis               | 39/727    | 5.40%  |
| Weight loss                                | HP:0001824 | Weight loss ≥5%                                                                                                                        | PMID:33031948 | Carvalho-Schneider | 2021 | Mixed; mean of 60.0 days post diagnosis               | 15/130    | 11.50% |

## SupplementalFile2

|                                                       |            |                                                                                                                                      |               |                    |      |                                                        |           |        |
|-------------------------------------------------------|------------|--------------------------------------------------------------------------------------------------------------------------------------|---------------|--------------------|------|--------------------------------------------------------|-----------|--------|
| Weight loss                                           | HP:0001824 | Weight loss >5%                                                                                                                      | PMID:33031948 | Carvalho-Schneider | 2021 | Mixed; mean of 30.0 days post diagnosis                | 13/150    | 8.70%  |
| Weight loss                                           | HP:0001824 | Sudden loss of BW (3%)                                                                                                               | PMID:33257910 | Goertz             | 2020 | Mixed; mean of 79.0 days post diagnosis                | 63/2113   | 3.00%  |
| Weight loss                                           | HP:0001824 | Loss of weight                                                                                                                       | PMID:33654513 | Suárez-Robles      | 2020 | Inpatient; mean of 90.0 days post discharge            | 50/134    | 37.30% |
| Weight loss                                           | HP:0001824 | Weight loss >5% baseline weight                                                                                                      | PMID:33729425 | Writing Committee  | 2021 | Inpatient (ICU); mean of 93.0 days post discharge      | 1/61      | 1.60%  |
| Weight loss                                           | HP:0001824 | Weight loss >5% baseline weight                                                                                                      | PMID:33729425 | Writing Committee  | 2021 | Inpatient (non-ICU); mean of 121.0 days post discharge | 30/281    | 10.70% |
| Confusion                                             | HP:0001289 | Altered consciousness/confusion                                                                                                      | PMID:33657671 | Darley             | 2021 | Mixed; mean of 69.0 days post diagnosis                | 0/78      | 0.00%  |
| Confusion                                             | HP:0001289 | Acute (sudden) confusion/disorientation                                                                                              | PMID:-1       | Davis              | 2020 | Mixed; mean of 114.5 days post diagnosis               | 691/3762  | 18.40% |
| Confusion                                             | HP:0001289 | Confusion                                                                                                                            | PMID:33306721 | Jacobs             | 2020 | Inpatient (non-ICU); mean of 35.0 days post discharge  | 16/183    | 8.70%  |
| Confusion                                             | HP:0001289 | Confusion/changed consciousness                                                                                                      | PMID:33273028 | Stavem             | 2020 | Outpatient; mean of 117.0 days post diagnosis          | 9/451     | 2.00%  |
| Confusion                                             | HP:0001289 | Confusion                                                                                                                            | PMID:32730238 | Tenforde           | 2020 | Outpatient; mean of 17.5 days post diagnosis           | 55/274    | 20.10% |
| Confusion                                             | HP:0001289 | Confusion                                                                                                                            | PMID:33461632 | Venturelli         | 2021 | Mixed; mean of 81.0 days post diagnosis                | 23/515    | 4.50%  |
| Seizure                                               | HP:0001250 | Seizures (confirmed)                                                                                                                 | PMID:-1       | Davis              | 2020 | Mixed; mean of 114.5 days post diagnosis               | 22/3762   | 0.60%  |
| Seizure                                               | HP:0001250 | Seizures                                                                                                                             | PMID:33755344 | Graham             | 2021 | Outpatient; mean of 141.0 days post diagnosis          | 1/100     | 1.00%  |
| Seizure                                               | HP:0001250 | Seizures                                                                                                                             | PMID:33682276 | Rass               | 2021 | Outpatient; mean of 90.0 days post diagnosis           | 0/32      | 0.00%  |
| Seizure                                               | HP:0001250 | Seizures                                                                                                                             | PMID:33682276 | Rass               | 2021 | Inpatient (non-ICU); mean of 90.0 days post discharge  | 0/72      | 0.00%  |
| Seizure                                               | HP:0001250 | Seizures                                                                                                                             | PMID:33682276 | Rass               | 2021 | Inpatient (ICU); mean of 90.0 days post discharge      | 0/31      | 0.00%  |
| Seizure                                               | HP:0001250 | Seizures/cramps                                                                                                                      | PMID:33273028 | Stavem             | 2020 | Outpatient; mean of 117.0 days post diagnosis          | 9/451     | 2.00%  |
| Pulmonary fibrosis                                    | HP:0002206 | Chest CT scan Fibrotic                                                                                                               | PMID:33676998 | González           | 2021 | Inpatient (ICU); mean of 90.0 days post discharge      | 12/57     | 21.10% |
| Pulmonary fibrosis                                    | HP:0002206 | Pulmonary fibrosis                                                                                                                   | PMID:33680620 | Iqbal              | 2021 | Mixed; mean of 38.1 days post diagnosis                | 6/158     | 3.80%  |
| Pulmonary fibrosis                                    | HP:0002206 | Lung fibrotic lesions                                                                                                                | PMID:33729425 | Writing Committee  | 2021 | Inpatient (ICU); mean of 93.0 days post discharge      | 18/49     | 36.70% |
| Pulmonary fibrosis                                    | HP:0002206 | Lung fibrotic lesions                                                                                                                | PMID:33729425 | Writing Committee  | 2021 | Inpatient (non-ICU); mean of 121.0 days post discharge | 15/121    | 12.40% |
| Pulmonary fibrosis                                    | HP:0002206 | residual CT abnormality: fibrosis                                                                                                    | PMID:33220049 | van den Borst      | 2020 | Inpatient (ICU); mean of 91.0 days post discharge      | 14/46     | 30.40% |
| Pulmonary fibrosis                                    | HP:0002206 | residual CT abnormality: fibrosis                                                                                                    | PMID:33220049 | van den Borst      | 2020 | Inpatient (non-ICU); mean of 91.0 days post discharge  | 8/51      | 15.70% |
| Paresthesia                                           | HP:0003401 | Tingling/prickling/pins and needles sensation                                                                                        | PMID:-1       | Davis              | 2020 | Mixed; mean of 114.5 days post diagnosis               | 1852/3762 | 49.20% |
| Paresthesia                                           | HP:0003401 | Numbness/tingling                                                                                                                    | PMID:33755344 | Graham             | 2021 | Outpatient; mean of 141.0 days post diagnosis          | 60/100    | 60.00% |
| Paresthesia                                           | HP:0003401 | Numbness/tingling/burning, selfreported                                                                                              | PMID:33682276 | Rass               | 2021 | Inpatient (non-ICU); mean of 90.0 days post discharge  | 11/72     | 15.30% |
| Paresthesia                                           | HP:0003401 | Numbness/tingling/burning, selfreported                                                                                              | PMID:33682276 | Rass               | 2021 | Inpatient (ICU); mean of 90.0 days post discharge      | 10/31/21  | 32.30% |
| Paresthesia                                           | HP:0003401 | Paresthesia                                                                                                                          | PMID:33729425 | Writing Committee  | 2021 | Inpatient (ICU); mean of 93.0 days post discharge      | 11/62     | 17.70% |
| Paresthesia                                           | HP:0003401 | Paresthesia                                                                                                                          | PMID:33729425 | Writing Committee  | 2021 | Inpatient (non-ICU); mean of 121.0 days post discharge | 40/359    | 11.10% |
| Asthenia                                              | HP:0025406 | Flulike symptoms (Myalgia, headache and/or asthenia)                                                                                 | PMID:33031948 | Carvalho-Schneider | 2021 | Mixed; mean of 60.0 days post diagnosis                | 28/130    | 21.50% |
| Asthenia                                              | HP:0025406 | Flulike symptoms (Myalgia, headache and/or asthenia)                                                                                 | PMID:33031948 | Carvalho-Schneider | 2021 | Mixed; mean of 30.0 days post diagnosis                | 54/150    | 36.00% |
| Asthenia                                              | HP:0025406 | Weakness                                                                                                                             | PMID:-1       | Davis              | 2020 | Mixed; mean of 114.5 days post diagnosis               | 1675/3762 | 44.50% |
| Asthenia                                              | HP:0025406 | asthenia (30.5%),                                                                                                                    | PMID:33521308 | Rosales-Castillo   | 2021 | Inpatient; mean of 50.8 days post discharge            | 36/118    | 30.50% |
| Asthenia                                              | HP:0025406 | Asthenia                                                                                                                             | PMID:33413976 | Taboada            | 2021 | Inpatient (ICU); mean of 180.0 days post discharge     | 34/91     | 37.40% |
| Asthenia                                              | HP:0025406 | Asthenia                                                                                                                             | PMID:33461632 | Venturelli         | 2021 | Mixed; mean of 81.0 days post diagnosis                | 186/515   | 36.10% |
| Exertional dyspnea                                    | HP:0002875 | Exertional breathlessness                                                                                                            | PMID:33872135 | Abdallah           | 2021 | Inpatient; mean of 102.3 days post discharge           | 17/25     | 68.00% |
| Exertional dyspnea                                    | HP:0002875 | Exertional breathlessness                                                                                                            | PMID:33872135 | Abdallah           | 2021 | Outpatient; mean of 129.8 days post diagnosis          | 31/38     | 81.60% |
| Exertional dyspnea                                    | HP:0002875 | Breathlessness walking up stairs                                                                                                     | PMID:33175566 | Chopra             | 2020 | Inpatient; mean of 60.0 days post discharge            | 112/488   | 23.00% |
| Exertional dyspnea                                    | HP:0002875 | Dyspnea on exertion                                                                                                                  | PMID:33413976 | Taboada            | 2021 | Inpatient (ICU); mean of 180.0 days post discharge     | 52/91     | 57.10% |
| Exertional dyspnea                                    | HP:0002875 | Postactivity polyphnoea                                                                                                              | PMID:32979574 | Xiong              | 2021 | Inpatient; mean of 97.0 days post discharge            | 115/538   | 21.40% |
| Exertional dyspnea                                    | HP:0002875 | exertional dyspnea (14.55%),                                                                                                         | PMID:32838236 | Zhao               | 2020 | Inpatient; mean of 78.5 days post discharge            | 8/55      | 14.50% |
| Poor appetite                                         | HP:0004396 | Lack of appetite                                                                                                                     | PMID:32644129 | Carfi              | 2020 | Inpatient; mean of 60.3 days post discharge            | 11/143    | 7.70%  |
| Poor appetite                                         | HP:0004396 | Loss of Appetite                                                                                                                     | PMID:-1       | Davis              | 2020 | Mixed; mean of 114.5 days post diagnosis               | 1942/3762 | 51.60% |
| Poor appetite                                         | HP:0004396 | Appetite problem severity 2 or more                                                                                                  | PMID:32729939 | Halpin             | 2021 | Inpatient (non-ICU); mean of 48.0 days post discharge  | 6/68      | 8.80%  |
| Poor appetite                                         | HP:0004396 | Decreased appetite                                                                                                                   | PMID:33428867 | Huang              | 2021 | Inpatient; mean of 186.0 days post discharge           | 138/1655  | 8.30%  |
| Poor appetite                                         | HP:0004396 | poor appetite                                                                                                                        | PMID:33205450 | Ludvigsson         | 2021 | Outpatient; mean of 210.0 days post diagnosis          | 01/05/21  | 20.00% |
| Poor appetite                                         | HP:0004396 | Loss of appetite                                                                                                                     | PMID:33654513 | Suárez-Robles      | 2020 | Inpatient; mean of 90.0 days post discharge            | 36/134    | 26.90% |
| Reduced residual volume                               | HP:0033753 | RV <LLN, n (%)                                                                                                                       | PMID:33872135 | Abdallah           | 2021 | Inpatient; mean of 102.3 days post discharge           | 08/25/21  | 32.00% |
| Reduced residual volume                               | HP:0033753 | RV <LLN, n (%)                                                                                                                       | PMID:33872135 | Abdallah           | 2021 | Outpatient; mean of 129.8 days post diagnosis          | 4/38      | 10.50% |
| Reduced residual volume                               | HP:0033753 | RV <80%, % of predicted                                                                                                              | PMID:33428867 | Huang              | 2021 | Inpatient; mean of 186.0 days post discharge           | 87/333    | 26.10% |
| Reduced residual volume                               | HP:0033753 | RV<LLN, No. (%)                                                                                                                      | PMID:33220049 | van den Borst      | 2020 | Inpatient (ICU); mean of 91.0 days post discharge      | 3/46      | 6.50%  |
| Reduced residual volume                               | HP:0033753 | RV<LLN, No. (%)                                                                                                                      | PMID:33220049 | van den Borst      | 2020 | Outpatient; mean of 91.0 days post diagnosis           | 02/27/21  | 7.40%  |
| Reduced residual volume                               | HP:0033753 | RV<LLN, No. (%)                                                                                                                      | PMID:33220049 | van den Borst      | 2020 | Inpatient (non-ICU); mean of 91.0 days post discharge  | 4/51      | 7.80%  |
| Restrictive ventilatory defect                        | HP:0002091 | Restrictive pattern spirometry                                                                                                       | PMID:33273026 | Arnold             | 2020 | Inpatient (ICU); mean of 84.0 days post discharge      | 03/18/21  | 16.70% |
| Restrictive ventilatory defect                        | HP:0002091 | Restrictive pattern spirometry                                                                                                       | PMID:33273026 | Arnold             | 2020 | Inpatient (non-ICU); mean of 84.0 days post discharge  | 8/65      | 12.30% |
| Restrictive ventilatory defect                        | HP:0002091 | Restrictive pattern spirometry                                                                                                       | PMID:33273026 | Arnold             | 2020 | Inpatient (non-ICU); mean of 84.0 days post discharge  | 0/27      | 0.00%  |
| Restrictive ventilatory defect                        | HP:0002091 | Restriction                                                                                                                          | PMID:33450302 | Moreno-Perez       | 2021 | Mixed; mean of 77.0 days post diagnosis                | 10/269    | 3.70%  |
| Restrictive ventilatory defect                        | HP:0002091 | Spirometry Interpretation: Restrictive pattern<br>five (19.23%) had restriction,one (3.85%) had mixed obstruction and<br>restriction | PMID:33865161 | Ordinola Navarro   | 2021 | Mixed; mean of 40.0 days post diagnosis                | 20/115    | 17.40% |
| Restrictive ventilatory defect                        | HP:0002091 |                                                                                                                                      | PMID:32835708 | Ramani             | 2021 | Inpatient (ICU); mean of 39.5 days post discharge      | 06/28/21  | 21.40% |
| Elevated circulating C-reactive protein concentration | HP:0011227 | C-reactive protein abnormal                                                                                                          | PMID:33755344 | Graham             | 2021 | Outpatient; mean of 141.0 days post diagnosis          | 10/52     | 19.20% |

## SupplementalFile2

|                                                       |            |                                                                                                                                                              |               |               |      |                                                       |           |        |
|-------------------------------------------------------|------------|--------------------------------------------------------------------------------------------------------------------------------------------------------------|---------------|---------------|------|-------------------------------------------------------|-----------|--------|
| Elevated circulating C-reactive protein concentration | HP:0011227 | 9.5% (of 332) had persistently elevated d-dimer and CRP concentration                                                                                        | PMID:33172844 | Mandal        | 2020 | Inpatient; mean of 54.0 days post discharge           | 32/332    | 9.60%  |
| Elevated circulating C-reactive protein concentration | HP:0011227 | C-reactive protein > 0.5 mg/dL                                                                                                                               | PMID:33450302 | Moreno-Perez  | 2021 | Mixed; mean of 77.0 days post diagnosis               | 32/276    | 11.60% |
| Elevated circulating C-reactive protein concentration | HP:0011227 | mild elevations in inflammatory markers such as CRP (12%)                                                                                                    | PMID:33303539 | Sonnweber     | 2020 | Mixed; mean of 103.0 days post diagnosis              | 17/145    | 11.70% |
| Elevated circulating C-reactive protein concentration | HP:0011227 | Mild increases in CRP were only present in 17/150                                                                                                            | PMID:33587810 | Townsend      | 2021 | Mixed; mean of 80.5 days post diagnosis               | 17/150    | 11.30% |
| Elevated circulating C-reactive protein concentration | HP:0011227 | C-reactive protein >1.0                                                                                                                                      | PMID:33461632 | Venturelli    | 2021 | Mixed; mean of 81.0 days post diagnosis               | 52/727    | 7.20%  |
| Ear pain                                              | HP:0030766 | Ear pain                                                                                                                                                     | PMID:-1       | Davis         | 2020 | Mixed; mean of 114.5 days post diagnosis              | 971/3762  | 25.80% |
| Ear pain                                              | HP:0030766 | Ear pain (8%)                                                                                                                                                | PMID:33257910 | Goertz        | 2020 | Mixed; mean of 79.0 days post diagnosis               | 169/2113  | 8.00%  |
| Ear pain                                              | HP:0030766 | Ear pain                                                                                                                                                     | PMID:33606031 | Logue         | 2021 | Inpatient; mean of 169.0 days post discharge          | 0/16      | 0.00%  |
| Ear pain                                              | HP:0030766 | Ear pain                                                                                                                                                     | PMID:33606031 | Logue         | 2021 | Outpatient; mean of 169.0 days post diagnosis         | 4/161     | 2.50%  |
| Ear pain                                              | HP:0030766 | Ear pain                                                                                                                                                     | PMID:33273028 | Stavem        | 2020 | Outpatient; mean of 117.0 days post diagnosis         | 9/451     | 2.00%  |
| Bronchiectasis                                        | HP:0002110 | Chest CT Scan Bronchiectasis                                                                                                                                 | PMID:33676998 | González      | 2021 | Inpatient (ICU); mean of 90.0 days post discharge     | 41/57     | 71.90% |
| Bronchiectasis                                        | HP:0002110 | Bronchiectasis                                                                                                                                               | PMID:32692945 | Liu           | 2020 | Inpatient; mean of 28.0 days post discharge           | 2/51      | 3.90%  |
| Bronchiectasis                                        | HP:0002110 | Bronchial dilation                                                                                                                                           | PMID:33303539 | Sonnweber     | 2020 | Mixed; mean of 63.0 days post diagnosis               | 46/145    | 31.70% |
| Bronchiectasis                                        | HP:0002110 | Bronchi(ol)ectasis                                                                                                                                           | PMID:33220049 | van den Borst | 2020 | Inpatient (ICU); mean of 91.0 days post discharge     | 22/46     | 47.80% |
| Bronchiectasis                                        | HP:0002110 | Bronchi(ol)ectasis                                                                                                                                           | PMID:33220049 | van den Borst | 2020 | Inpatient (non-ICU); mean of 91.0 days post discharge | 29/51     | 56.90% |
| Productive cough                                      | HP:0031245 | Cough with mucus production                                                                                                                                  | PMID:-1       | Davis         | 2020 | Mixed; mean of 114.5 days post diagnosis              | 1062/3762 | 28.20% |
| Productive cough                                      | HP:0031245 | Wet cough                                                                                                                                                    | PMID:33676998 | González      | 2021 | Inpatient (ICU); mean of 90.0 days post discharge     | 11/62     | 17.70% |
| Productive cough                                      | HP:0031245 | Cough with expectoration (Figure 1)                                                                                                                          | PMID:33252665 | Petersen      | 2020 | Outpatient; mean of 99.0 days post diagnosis          | 11/180    | 6.10%  |
| Productive cough                                      | HP:0031245 | Productive cough                                                                                                                                             | PMID:33273028 | Stavem        | 2020 | Outpatient; mean of 117.0 days post diagnosis         | 18/451    | 4.00%  |
| Productive cough                                      | HP:0031245 | cough and sputum (1.81%)                                                                                                                                     | PMID:32838236 | Zhao          | 2020 | Inpatient; mean of 78.5 days post discharge           | 1/55      | 1.80%  |
| Reticular pattern on pulmonary HRCT                   | HP:0025390 | Chest CT Scan Reticular                                                                                                                                      | PMID:33676998 | González      | 2021 | Inpatient (ICU); mean of 90.0 days post discharge     | 28/57     | 49.10% |
| Reticular pattern on pulmonary HRCT                   | HP:0025390 | Chest CT/Reticular pattern                                                                                                                                   | PMID:33428867 | Huang         | 2021 | Inpatient; mean of 186.0 days post discharge          | 2/253     | 0.80%  |
| Reticular pattern on pulmonary HRCT                   | HP:0025390 | Reticular pattern                                                                                                                                            | PMID:32692945 | Liu           | 2020 | Inpatient; mean of 28.0 days post discharge           | 0/51      | 0.00%  |
| Reticular pattern on pulmonary HRCT                   | HP:0025390 | CT reticulation                                                                                                                                              | PMID:33303539 | Sonnweber     | 2020 | Mixed; mean of 63.0 days post diagnosis               | 84/145    | 57.90% |
| Reticular pattern on pulmonary HRCT                   | HP:0025390 | CT: reticulations                                                                                                                                            | PMID:33479105 | Trinkmann     | 2021 | Mixed; mean of 68.0 days post diagnosis               | 02/17/21  | 11.80% |
| Stroke                                                | HP:0001297 | Stroke                                                                                                                                                       | PMID:33680620 | Iqbal         | 2021 | Mixed; mean of 38.1 days post diagnosis               | 1/158     | 0.60%  |
| Stroke                                                | HP:0001297 | Stroke with clinical symptoms                                                                                                                                | PMID:33682276 | Rass          | 2021 | Outpatient; mean of 90.0 days post diagnosis          | 0/32      | 0.00%  |
| Stroke                                                | HP:0001297 | Stroke with clinical symptoms                                                                                                                                | PMID:33682276 | Rass          | 2021 | Inpatient (non-ICU); mean of 90.0 days post discharge | 1/72      | 1.40%  |
| Stroke                                                | HP:0001297 | Stroke with clinical symptoms                                                                                                                                | PMID:33682276 | Rass          | 2021 | Inpatient (ICU); mean of 90.0 days post discharge     | 0/31      | 0.00%  |
| Short term memory impairment                          | HP:0033687 | Short-term memory loss (memory that lasts ~30 seconds, i.e. remembering a phone number before writing it down, or forgetting you're in the middle of a task) | PMID:-1       | Davis         | 2020 | Mixed; mean of 114.5 days post diagnosis              | 2438/3762 | 64.80% |
| Short term memory impairment                          | HP:0033687 | Short-term memory deficit                                                                                                                                    | PMID:33755344 | Graham        | 2021 | Outpatient; mean of 141.0 days post diagnosis         | 32/100    | 32.00% |
| Short term memory impairment                          | HP:0033687 | New or worsened short-term memory problem                                                                                                                    | PMID:32729939 | Halpin        | 2021 | Inpatient (ICU); mean of 48.0 days post discharge     | 6/32      | 18.80% |
| Short term memory impairment                          | HP:0033687 | New or worsened short-term memory problem                                                                                                                    | PMID:32729939 | Halpin        | 2021 | Inpatient (non-ICU); mean of 48.0 days post discharge | 12/68     | 17.60% |
| Stiff neck                                            | HP:0025258 | Stiff neck                                                                                                                                                   | PMID:-1       | Davis         | 2020 | Mixed; mean of 114.5 days post diagnosis              | 1471/3762 | 39.10% |
| Stiff neck                                            | HP:0025258 | Neck stiffness                                                                                                                                               | PMID:33682276 | Rass          | 2021 | Outpatient; mean of 90.0 days post diagnosis          | 0/32      | 0.00%  |
| Stiff neck                                            | HP:0025258 | Neck stiffness                                                                                                                                               | PMID:33682276 | Rass          | 2021 | Inpatient (non-ICU); mean of 90.0 days post discharge | 0/72      | 0.00%  |
| Stiff neck                                            | HP:0025258 | Neck stiffness                                                                                                                                               | PMID:33682276 | Rass          | 2021 | Inpatient (ICU); mean of 90.0 days post discharge     | 0/31      | 0.00%  |
| Dysphonia                                             | HP:0001618 | Changes in the voice                                                                                                                                         | PMID:-1       | Davis         | 2020 | Mixed; mean of 114.5 days post diagnosis              | 1012/3762 | 26.90% |
| Dysphonia                                             | HP:0001618 | Voice change                                                                                                                                                 | PMID:32729939 | Halpin        | 2021 | Inpatient (ICU); mean of 48.0 days post discharge     | 8/32      | 25.00% |
| Dysphonia                                             | HP:0001618 | Voice change                                                                                                                                                 | PMID:32729939 | Halpin        | 2021 | Inpatient (non-ICU); mean of 48.0 days post discharge | 12/68     | 17.60% |
| Dysphonia                                             | HP:0001618 | Dysphonia                                                                                                                                                    | PMID:33654513 | Suárez-Robles | 2020 | Inpatient; mean of 90.0 days post discharge           | 11/134    | 8.20%  |
| Ataxia                                                | HP:0001251 | Ataxia                                                                                                                                                       | PMID:33755344 | Graham        | 2021 | Outpatient; mean of 141.0 days post diagnosis         | 1/100     | 1.00%  |
| Ataxia                                                | HP:0001251 | Cerebellar ataxia                                                                                                                                            | PMID:33682276 | Rass          | 2021 | Outpatient; mean of 90.0 days post diagnosis          | 0/32      | 0.00%  |
| Ataxia                                                | HP:0001251 | Cerebellar ataxia                                                                                                                                            | PMID:33682276 | Rass          | 2021 | Inpatient (non-ICU); mean of 90.0 days post discharge | 0/72      | 0.00%  |
| Ataxia                                                | HP:0001251 | Cerebellar ataxia                                                                                                                                            | PMID:33682276 | Rass          | 2021 | Inpatient (ICU); mean of 90.0 days post discharge     | 0/31      | 0.00%  |
| Red eye                                               | HP:0025337 | Red eyes                                                                                                                                                     | PMID:32644129 | Carfi         | 2020 | Inpatient; mean of 60.3 days post discharge           | 14/143    | 9.80%  |
| Red eye                                               | HP:0025337 | Red eyes                                                                                                                                                     | PMID:33564789 | Chun          | 2021 | Mixed; mean of 63.0 days post diagnosis               | 0/61      | 0.00%  |
| Red eye                                               | HP:0025337 | Bloodshot eyes                                                                                                                                               | PMID:-1       | Davis         | 2020 | Mixed; mean of 114.5 days post diagnosis              | 579/3762  | 15.40% |
| Red eye                                               | HP:0025337 | Eye irritation                                                                                                                                               | PMID:33306721 | Jacobs        | 2020 | Inpatient (non-ICU); mean of 35.0 days post discharge | 15/183    | 8.20%  |
| Dysarthria                                            | HP:0001260 | Dysarthria                                                                                                                                                   | PMID:33755344 | Graham        | 2021 | Outpatient; mean of 141.0 days post diagnosis         | 2/100     | 2.00%  |
| Dysarthria                                            | HP:0001260 | Dysarthria                                                                                                                                                   | PMID:33682276 | Rass          | 2021 | Outpatient; mean of 90.0 days post diagnosis          | 1/32      | 3.10%  |
| Dysarthria                                            | HP:0001260 | Dysarthria                                                                                                                                                   | PMID:33682276 | Rass          | 2021 | Inpatient (non-ICU); mean of 90.0 days post discharge | 1/72      | 1.40%  |
| Dysarthria                                            | HP:0001260 | Dysarthria                                                                                                                                                   | PMID:33682276 | Rass          | 2021 | Inpatient (ICU); mean of 90.0 days post discharge     | 01/31/21  | 3.20%  |
| Hypertension                                          | HP:0000822 | Abnormally high blood pressure                                                                                                                               | PMID:-1       | Davis         | 2020 | Mixed; mean of 114.5 days post diagnosis              | 755/3762  | 20.10% |
| Hypertension                                          | HP:0000822 | Uncontrolled BP requiring therapeutic change                                                                                                                 | PMID:33052920 | De Lorenzo    | 2020 | Inpatient; mean of 21.5 days post discharge           | 26/126    | 20.60% |



## SupplementalFile2

|                                  |            |                                                                                       |               |                   |      |                                                        |           |        |
|----------------------------------|------------|---------------------------------------------------------------------------------------|---------------|-------------------|------|--------------------------------------------------------|-----------|--------|
| Hypertension                     | HP:0000822 | Uncontrolled BP requiring therapeutic change                                          | PMID:33052920 | De Lorenzo        | 2020 | Outpatient; mean of 26.0 days post diagnosis           | 14/59     | 23.70% |
| Hypertension                     | HP:0000822 | Newly diagnosed hypertension                                                          | PMID:32979574 | Xiong             | 2021 | Inpatient; mean of 97.0 days post discharge            | 7/538     | 1.30%  |
| Muscle weakness                  | HP:0001324 | muscle weakness                                                                       | PMID:33205450 | Ludvigsson        | 2021 | Outpatient; mean of 210.0 days post diagnosis          | 04/05/21  | 80.00% |
| Muscle weakness                  | HP:0001324 | Paresis                                                                               | PMID:33682276 | Rass              | 2021 | Outpatient; mean of 90.0 days post diagnosis           | 0/32      | 0.00%  |
| Muscle weakness                  | HP:0001324 | Paresis                                                                               | PMID:33682276 | Rass              | 2021 | Inpatient (non-ICU); mean of 90.0 days post discharge  | 3/72      | 4.20%  |
| Muscle weakness                  | HP:0001324 | Paresis                                                                               | PMID:33682276 | Rass              | 2021 | Inpatient (ICU); mean of 90.0 days post discharge      | 4/31      | 12.90% |
| Hypoesthesia                     | HP:0033748 | Numbness/loss of sensation                                                            | PMID:-1       | Davis             | 2020 | Mixed; mean of 114.5 days post diagnosis               | 1332/3762 | 35.40% |
| Hypoesthesia                     | HP:0033748 | numbness                                                                              | PMID:33205450 | Ludvigsson        | 2021 | Outpatient; mean of 210.0 days post diagnosis          | 01/05/21  | 20.00% |
| Hypoesthesia                     | HP:0033748 | Decreased/disturbed sensibility                                                       | PMID:33682276 | Rass              | 2021 | Inpatient (non-ICU); mean of 90.0 days post discharge  | 9/72      | 12.50% |
| Hypoesthesia                     | HP:0033748 | Decreased/disturbed sensibility                                                       | PMID:33682276 | Rass              | 2021 | Inpatient (ICU); mean of 90.0 days post discharge      | 08/31/21  | 25.80% |
| Abnormal exteroceptive sensation | HP:0033747 | Sensory dysfunction                                                                   | PMID:33755344 | Graham            | 2021 | Outpatient; mean of 141.0 days post diagnosis          | 8/53      | 15.10% |
| Abnormal exteroceptive sensation | HP:0033747 | Decreased/disturbed sensibility                                                       | PMID:33682276 | Rass              | 2021 | Outpatient; mean of 90.0 days post diagnosis           | 3/32      | 9.40%  |
| Abnormal exteroceptive sensation | HP:0033747 | Decreased/disturbed sensibility                                                       | PMID:33682276 | Rass              | 2021 | Inpatient (non-ICU); mean of 90.0 days post discharge  | 9/72      | 12.50% |
| Abnormal exteroceptive sensation | HP:0033747 | Decreased/disturbed sensibility                                                       | PMID:33682276 | Rass              | 2021 | Inpatient (ICU); mean of 90.0 days post discharge      | 08/31/21  | 25.80% |
| Hypogeusia                       | HP:0000224 | Hypogeusia, self-reported                                                             | PMID:33682276 | Rass              | 2021 | Outpatient; mean of 90.0 days post diagnosis           | 7/32      | 21.90% |
| Hypogeusia                       | HP:0000224 | Hypogeusia, self-reported                                                             | PMID:33682276 | Rass              | 2021 | Inpatient (non-ICU); mean of 90.0 days post discharge  | 11/72     | 15.30% |
| Hypogeusia                       | HP:0000224 | Hypogeusia, self-reported                                                             | PMID:33682276 | Rass              | 2021 | Inpatient (ICU); mean of 90.0 days post discharge      | 0/31      | 0.00%  |
| Hypogeusia                       | HP:0000224 | 2 female patients still experienced a decrease sense of taste during follow-up period | PMID:32838236 | Zhao              | 2020 | Inpatient; mean of 78.5 days post discharge            | 2/55      | 3.60%  |
| Wheezing                         | HP:0030828 | Shortness of breath/chest tightness/wheezing                                          | PMID:33175566 | Chopra            | 2020 | Inpatient; mean of 60.0 days post discharge            | 81/488    | 16.60% |
| Wheezing                         | HP:0030828 | Wheezing                                                                              | PMID:33785495 | Dennis            | 2021 | Inpatient; mean of 138.0 days post discharge           | 23/37     | 62.20% |
| Wheezing                         | HP:0030828 | Wheezing                                                                              | PMID:33785495 | Dennis            | 2021 | Outpatient; mean of 141.0 days post diagnosis          | 75/163    | 46.00% |
| Wheezing                         | HP:0030828 | Wheeze                                                                                | PMID:33273028 | Stavem            | 2020 | Outpatient; mean of 117.0 days post diagnosis          | 18/451    | 4.00%  |
| Nonproductive cough              | HP:0031246 | Dry cough                                                                             | PMID:-1       | Davis             | 2020 | Mixed; mean of 114.5 days post diagnosis               | 2491/3762 | 66.20% |
| Nonproductive cough              | HP:0031246 | Dry cough                                                                             | PMID:33676998 | González          | 2021 | Inpatient (ICU); mean of 90.0 days post discharge      | 10/62     | 16.10% |
| Nonproductive cough              | HP:0031246 | Dry cough (Figure 1)                                                                  | PMID:33252665 | Petersen          | 2020 | Outpatient; mean of 99.0 days post diagnosis           | 7/180     | 3.90%  |
| Nonproductive cough              | HP:0031246 | Dry cough                                                                             | PMID:33273028 | Stavem            | 2020 | Outpatient; mean of 117.0 days post diagnosis          | 27/451    | 6.00%  |
| Encephalopathy                   | HP:0001298 | Mild encephalopathy                                                                   | PMID:33682276 | Rass              | 2021 | Outpatient; mean of 90.0 days post diagnosis           | 0/32      | 0.00%  |
| Encephalopathy                   | HP:0001298 | Mild encephalopathy                                                                   | PMID:33682276 | Rass              | 2021 | Inpatient (non-ICU); mean of 90.0 days post discharge  | 1/72      | 1.40%  |
| Encephalopathy                   | HP:0001298 | Mild encephalopathy                                                                   | PMID:33682276 | Rass              | 2021 | Inpatient (ICU); mean of 90.0 days post discharge      | 01/31/21  | 3.20%  |
| Pleural thickening               | HP:0031944 | Pleural incrossation                                                                  | PMID:33540129 | Zhang             | 2021 | Inpatient; mean of 90.0 days post discharge            | 28/263    | 10.60% |
| Pleural thickening               | HP:0031944 | Pleural incrossation                                                                  | PMID:33540129 | Zhang             | 2021 | Inpatient; mean of 180.0 days post discharge           | 9/96      | 9.40%  |
| Pleural thickening               | HP:0031944 | Pleural incrossation                                                                  | PMID:33540129 | Zhang             | 2021 | Inpatient; mean of 28.0 days post discharge            | 35/428    | 8.20%  |
| Orthostatic hypotension          | HP:0001278 | Orthostatic hypotension                                                               | PMID:33682276 | Rass              | 2021 | Outpatient; mean of 90.0 days post diagnosis           | 0/32      | 0.00%  |
| Orthostatic hypotension          | HP:0001278 | Orthostatic hypotension                                                               | PMID:33682276 | Rass              | 2021 | Inpatient (non-ICU); mean of 90.0 days post discharge  | 0/72      | 0.00%  |
| Orthostatic hypotension          | HP:0001278 | Orthostatic hypotension                                                               | PMID:33682276 | Rass              | 2021 | Inpatient (ICU); mean of 90.0 days post discharge      | 01/31/21  | 3.20%  |
| Interlobular septal thickening   | HP:0030879 | Chest CT scan Interlobular septal thickening                                          | PMID:33676998 | González          | 2021 | Inpatient (ICU); mean of 90.0 days post discharge      | 46/57     | 80.70% |
| Interlobular septal thickening   | HP:0030879 | Chest CT/Interlobular septal thickening                                               | PMID:33428867 | Huang             | 2021 | Inpatient; mean of 186.0 days post discharge           | 3/256     | 1.20%  |
| Interlobular septal thickening   | HP:0030879 | Interlobular septal thickening                                                        | PMID:32692945 | Liu               | 2020 | Inpatient; mean of 28.0 days post discharge            | 18/51     | 35.30% |
| Bradyphrenia                     | HP:0031843 | Slowed thoughts                                                                       | PMID:-1       | Davis             | 2020 | Mixed; mean of 114.5 days post diagnosis               | 1572/3762 | 41.80% |
| Bradyphrenia                     | HP:0031843 | Mental slowness                                                                       | PMID:33729425 | Writing Committee | 2021 | Inpatient (ICU); mean of 93.0 days post discharge      | 4/62      | 6.50%  |
| Bradyphrenia                     | HP:0031843 | Mental slowness                                                                       | PMID:33729425 | Writing Committee | 2021 | Inpatient (non-ICU); mean of 121.0 days post discharge | 38/353    | 10.80% |
| Hyperhidrosis                    | HP:0000975 | Sweats                                                                                | PMID:33606031 | Logue             | 2021 | Inpatient; mean of 169.0 days post discharge           | 01/16/21  | 6.30%  |
| Hyperhidrosis                    | HP:0000975 | Sweats                                                                                | PMID:33606031 | Logue             | 2021 | Outpatient; mean of 169.0 days post diagnosis          | 4/161     | 2.50%  |
| Hyperhidrosis                    | HP:0000975 | Sweating                                                                              | PMID:32979574 | Xiong             | 2021 | Inpatient; mean of 97.0 days post discharge            | 127/538   | 23.60% |
| Gait disturbance                 | HP:0001288 | Gait dysfunction                                                                      | PMID:33755344 | Graham            | 2021 | Outpatient; mean of 141.0 days post diagnosis          | 5/100     | 5.00%  |
| Gait disturbance                 | HP:0001288 | Gait abnormality                                                                      | PMID:33682276 | Rass              | 2021 | Inpatient (non-ICU); mean of 90.0 days post discharge  | 2/72      | 2.80%  |
| Gait disturbance                 | HP:0001288 | Gait abnormality                                                                      | PMID:33682276 | Rass              | 2021 | Inpatient (ICU); mean of 90.0 days post discharge      | 4/31      | 12.90% |
| Syncope                          | HP:0001279 | Fainting                                                                              | PMID:-1       | Davis             | 2020 | Mixed; mean of 114.5 days post diagnosis               | 486/3762  | 12.90% |
| Syncope                          | HP:0001279 | No patient reported a recent syncope.                                                 | PMID:32730619 | Puntmann          | 2020 | Mixed; mean of 71.0 days post diagnosis                | 0/100     | 0.00%  |
| Syncope                          | HP:0001279 | Syncope                                                                               | PMID:33461632 | Venturelli        | 2021 | Mixed; mean of 81.0 days post diagnosis                | 1/515     | 0.20%  |
| Frontal release signs            | HP:0000743 | Positive frontal release signs                                                        | PMID:33682276 | Rass              | 2021 | Outpatient; mean of 90.0 days post diagnosis           | 3/32      | 9.40%  |
| Frontal release signs            | HP:0000743 | Positive frontal release signs                                                        | PMID:33682276 | Rass              | 2021 | Inpatient (non-ICU); mean of 90.0 days post discharge  | 13/72     | 18.10% |
| Frontal release signs            | HP:0000743 | Positive frontal release signs                                                        | PMID:33682276 | Rass              | 2021 | Inpatient (ICU); mean of 90.0 days post discharge      | 4/31      | 12.90% |
| Hyposmia                         | HP:0004409 | Hyposmia, self-reported                                                               | PMID:33682276 | Rass              | 2021 | Outpatient; mean of 90.0 days post diagnosis           | 10/32     | 31.30% |
| Hyposmia                         | HP:0004409 | Hyposmia, self-reported                                                               | PMID:33682276 | Rass              | 2021 | Inpatient (non-ICU); mean of 90.0 days post discharge  | 11/72     | 15.30% |
| Hyposmia                         | HP:0004409 | Hyposmia, self-reported                                                               | PMID:33682276 | Rass              | 2021 | Inpatient (ICU); mean of 90.0 days post discharge      | 0/31      | 0.00%  |
| Urinary incontinence             | HP:0000020 | Bladder control issues                                                                | PMID:-1       | Davis             | 2020 | Mixed; mean of 114.5 days post diagnosis               | 532/3762  | 14.10% |
| Urinary incontinence             | HP:0000020 | New bladder control problem                                                           | PMID:32729939 | Halpin            | 2021 | Inpatient (ICU); mean of 48.0 days post discharge      | 4/32      | 12.50% |
| Urinary incontinence             | HP:0000020 | New bladder control problem                                                           | PMID:32729939 | Halpin            | 2021 | Inpatient (non-ICU); mean of 48.0 days post discharge  | 6/68      | 8.80%  |
| Hearing impairment               | HP:0000365 | Ear and Hearing Symptoms - Hearing loss                                               | PMID:-1       | Davis             | 2020 | Mixed; mean of 114.5 days post diagnosis               | 326/3762  | 8.70%  |
| Hearing impairment               | HP:0000365 | Decreased hearing                                                                     | PMID:33755344 | Graham            | 2021 | Outpatient; mean of 141.0 days post diagnosis          | 2/100     | 2.00%  |

## SupplementalFile2

|                                                               |            |                                                                                                                                        |               |                    |      |                                                        |           |        |
|---------------------------------------------------------------|------------|----------------------------------------------------------------------------------------------------------------------------------------|---------------|--------------------|------|--------------------------------------------------------|-----------|--------|
| Hearing impairment                                            | HP:0000365 | Hearing loss, self-reported                                                                                                            | PMID:32735466 | Munro              | 2020 | Inpatient; mean of 56.0 days post discharge            | 8/121     | 6.60%  |
| Tinnitus                                                      | HP:0000360 | Tinnitus                                                                                                                               | PMID:-1       | Davis              | 2020 | Mixed; mean of 114.5 days post diagnosis               | 1280/3762 | 34.00% |
| Tinnitus                                                      | HP:0000360 | Tinnitus                                                                                                                               | PMID:33755344 | Graham             | 2021 | Outpatient; mean of 141.0 days post diagnosis          | 29/100    | 29.00% |
| Tinnitus                                                      | HP:0000360 | Tinnitus, self-reported                                                                                                                | PMID:32735466 | Munro              | 2020 | Inpatient; mean of 56.0 days post discharge            | 8/121     | 6.60%  |
| Tremor                                                        | HP:0001337 | Tremors                                                                                                                                | PMID:-1       | Davis              | 2020 | Mixed; mean of 114.5 days post diagnosis               | 1511/3762 | 40.20% |
| Tremor                                                        | HP:0001337 | Tremors                                                                                                                                | PMID:33682276 | Rass               | 2021 | Inpatient (non-ICU); mean of 90.0 days post discharge  | 9/72      | 12.50% |
| Tremor                                                        | HP:0001337 | Tremors                                                                                                                                | PMID:33682276 | Rass               | 2021 | Inpatient (ICU); mean of 90.0 days post discharge      | 4/31      | 12.90% |
| Brain fog                                                     | HP:0033630 | Cognitive Dysfunction, overall (Brain fog)                                                                                             | PMID:-1       | Davis              | 2020 | Mixed; mean of 114.5 days post diagnosis               | 3203/3762 | 85.10% |
| Brain fog                                                     | HP:0033630 | Brain fog                                                                                                                              | PMID:33755344 | Graham             | 2021 | Outpatient; mean of 141.0 days post diagnosis          | 85/100    | 85.00% |
| Brain fog                                                     | HP:0033630 | Brain fog                                                                                                                              | PMID:33680620 | Iqbal              | 2021 | Mixed; mean of 38.1 days post diagnosis                | 30/158    | 19.00% |
| Decreased maximal oxygen uptake                               | HP:0033760 | VO2 %predicted <85%                                                                                                                    | PMID:33872135 | Abdallah           | 2021 | Inpatient; mean of 102.3 days post discharge           | 20/25     | 80.00% |
| Decreased maximal oxygen uptake                               | HP:0033760 | VO2 %predicted <85%                                                                                                                    | PMID:33872135 | Abdallah           | 2021 | Outpatient; mean of 129.8 days post diagnosis          | 21/38     | 55.30% |
| Decreased maximal oxygen uptake                               | HP:0033760 | VO2 peak, % of predicted VO2 max < 80%                                                                                                 | PMID:33490928 | Ramani             | 2021 | Inpatient; mean of 48.0 days post discharge            | 28/51     | 54.90% |
| Bradykinesia                                                  | HP:0002067 | Bradykinesia                                                                                                                           | PMID:33682276 | Rass               | 2021 | Outpatient; mean of 90.0 days post diagnosis           | 0/32      | 0.00%  |
| Bradykinesia                                                  | HP:0002067 | Bradykinesia                                                                                                                           | PMID:33682276 | Rass               | 2021 | Inpatient (non-ICU); mean of 90.0 days post discharge  | 3/72      | 4.20%  |
| Bradykinesia                                                  | HP:0002067 | Bradykinesia                                                                                                                           | PMID:33682276 | Rass               | 2021 | Inpatient (ICU); mean of 90.0 days post discharge      | 4/31      | 12.90% |
| Reduced ejection fraction                                     | HP:0012664 | Left ventricular ejection fraction (%) Impaired (≤51%)                                                                                 | PMID:33785495 | Dennis             | 2021 | Inpatient; mean of 138.0 days post discharge           | 4/37      | 10.80% |
| Reduced ejection fraction                                     | HP:0012664 | Left ventricular ejection fraction, impaired                                                                                           | PMID:33785495 | Dennis             | 2021 | Outpatient; mean of 141.0 days post diagnosis          | 7/162     | 4.30%  |
| Reduced ejection fraction                                     | HP:0012664 | reduced left ventricular ejection fraction                                                                                             | PMID:33303539 | Sonnweber          | 2020 | Mixed; mean of 63.0 days post diagnosis                | 4/145     | 2.80%  |
| Suicidal ideation                                             | HP:0031589 | Suicidality                                                                                                                            | PMID:-1       | Davis              | 2020 | Mixed; mean of 114.5 days post diagnosis               | 436/3762  | 11.60% |
| Suicidal ideation                                             | HP:0031589 | Thoughts of self-harm                                                                                                                  | PMID:32729939 | Halpin             | 2021 | Inpatient (ICU); mean of 48.0 days post discharge      | 1/32      | 3.10%  |
| Suicidal ideation                                             | HP:0031589 | Thoughts of self-harm                                                                                                                  | PMID:32729939 | Halpin             | 2021 | Inpatient (non-ICU); mean of 48.0 days post discharge  | 1/68      | 1.50%  |
| Abdominal symptom                                             | HP:0011458 | Digestive disorders                                                                                                                    | PMID:33031948 | Carvalho-Schneider | 2021 | Mixed; mean of 60.0 days post diagnosis                | 15/130    | 11.50% |
| Abdominal symptom                                             | HP:0011458 | Digestive disorders                                                                                                                    | PMID:33031948 | Carvalho-Schneider | 2021 | Mixed; mean of 30.0 days post diagnosis                | 26/150    | 17.30% |
| Abdominal symptom                                             | HP:0011458 | Lower gastro-intestinal symptoms                                                                                                       | PMID:33461632 | Venturelli         | 2021 | Mixed; mean of 81.0 days post diagnosis                | 7/515     | 1.40%  |
| Lymphopenia                                                   | HP:0001888 | 7.3% of 247 patients had persisting lymphopaenia                                                                                       | PMID:33172844 | Mandal             | 2020 | Inpatient; mean of 54.0 days post discharge            | 18/247    | 7.30%  |
| Lymphopenia                                                   | HP:0001888 | Lymphocytes, <1500 per mm <sup>3</sup>                                                                                                 | PMID:33450302 | Moreno-Perez       | 2021 | Mixed; mean of 77.0 days post diagnosis                | 55/277    | 19.90% |
| Lymphopenia                                                   | HP:0001888 | Lymphocytes <1000                                                                                                                      | PMID:33461632 | Venturelli         | 2021 | Mixed; mean of 81.0 days post diagnosis                | 28/727    | 3.90%  |
| Tachycardia                                                   | HP:0001649 | Tachycardia                                                                                                                            | PMID:-1       | Davis              | 2020 | Mixed; mean of 114.5 days post diagnosis               | 2308/3762 | 61.40% |
| Tachycardia                                                   | HP:0001649 | Increased resting heart rate (28%)                                                                                                     | PMID:33257910 | Goertz             | 2020 | Mixed; mean of 79.0 days post diagnosis                | 591/2113  | 28.00% |
| Tachycardia                                                   | HP:0001649 | Resting heart rate increase                                                                                                            | PMID:32979574 | Xiong              | 2021 | Inpatient; mean of 97.0 days post discharge            | 60/538    | 11.20% |
| Parkinsonism                                                  | HP:0001300 | Parkinsonism                                                                                                                           | PMID:33682276 | Rass               | 2021 | Outpatient; mean of 90.0 days post diagnosis           | 0/32      | 0.00%  |
| Parkinsonism                                                  | HP:0001300 | Parkinsonism                                                                                                                           | PMID:33682276 | Rass               | 2021 | Inpatient (non-ICU); mean of 90.0 days post discharge  | 0/72      | 0.00%  |
| Parkinsonism                                                  | HP:0001300 | Parkinsonism                                                                                                                           | PMID:33682276 | Rass               | 2021 | Inpatient (ICU); mean of 90.0 days post discharge      | 01/31/21  | 3.20%  |
| Increased circulating ferritin concentration                  | HP:0003281 | ferritin abnormal                                                                                                                      | PMID:33755344 | Graham             | 2021 | Outpatient; mean of 141.0 days post diagnosis          | 02/11/21  | 18.20% |
| Increased circulating ferritin concentration                  | HP:0003281 | Ferritin > 150 mg/L                                                                                                                    | PMID:33450302 | Moreno-Perez       | 2021 | Mixed; mean of 77.0 days post diagnosis                | 112/276   | 40.60% |
| Increased circulating ferritin concentration                  | HP:0003281 | D-dimer, NT-proBNP, and serum ferritin were still elevated in 27%, 23%, and 17% of COVID-19 patients at second follow-up, respectively | PMID:33303539 | Sonnweber          | 2020 | Mixed; mean of 103.0 days post diagnosis               | 23/135    | 17.00% |
| Pulmonary bulla                                               | HP:0032446 | Emphysema/Pulmonary bulla                                                                                                              | PMID:33540129 | Zhang              | 2021 | Inpatient; mean of 90.0 days post discharge            | 12/263    | 4.60%  |
| Pulmonary bulla                                               | HP:0032446 | Emphysema/Pulmonary bulla                                                                                                              | PMID:33540129 | Zhang              | 2021 | Inpatient; mean of 180.0 days post discharge           | 8/96      | 8.30%  |
| Pulmonary bulla                                               | HP:0032446 | Emphysema/Pulmonary bulla                                                                                                              | PMID:33540129 | Zhang              | 2021 | Inpatient; mean of 28.0 days post discharge            | 19/428    | 4.40%  |
| Diminished health-related quality of life                     | HP:0033665 | EQ-5D-5L Decreased by at least 0.05 (MCID;Minimal clinically important difference as validated in respiratory disease)                 | PMID:32729939 | Halpin             | 2021 | Inpatient (ICU); mean of 48.0 days post discharge      | 22/32     | 68.80% |
| Diminished health-related quality of life                     | HP:0033665 | EQ-5D-5L Decreased by at least 0.05 (MCID;Minimal clinically important difference as validated in respiratory disease)                 | PMID:32729939 | Halpin             | 2021 | Inpatient (non-ICU); mean of 48.0 days post discharge  | 31/68     | 45.60% |
| Diminished health-related quality of life                     | HP:0033665 | The most frequently impaired outcomes were quality of life (51%)                                                                       | PMID:33008936 | Wong               | 2020 | Inpatient; mean of 91.0 days post discharge            | 40/78     | 51.30% |
| Anorexia                                                      | HP:0002039 | Anorexia (Figure 1)                                                                                                                    | PMID:33252665 | Petersen           | 2020 | Outpatient; mean of 99.0 days post diagnosis           | 4/180     | 2.20%  |
| Anorexia                                                      | HP:0002039 | Anorexia                                                                                                                               | PMID:33729425 | Writing Committee  | 2021 | Inpatient (ICU); mean of 93.0 days post discharge      | 9/66      | 13.60% |
| Anorexia                                                      | HP:0002039 | Anorexia                                                                                                                               | PMID:33729425 | Writing Committee  | 2021 | Inpatient (non-ICU); mean of 121.0 days post discharge | 25/370    | 6.80%  |
| Frailty                                                       | HP:0033675 | Frail                                                                                                                                  | PMID:33220049 | van den Borst      | 2020 | Inpatient (ICU); mean of 91.0 days post discharge      | 4/46      | 8.70%  |
| Frailty                                                       | HP:0033675 | Frail                                                                                                                                  | PMID:33220049 | van den Borst      | 2020 | Outpatient; mean of 91.0 days post diagnosis           | 01/27/21  | 3.70%  |
| Frailty                                                       | HP:0033675 | Frail                                                                                                                                  | PMID:33220049 | van den Borst      | 2020 | Inpatient (non-ICU); mean of 91.0 days post discharge  | 6/51      | 11.80% |
| Shivering                                                     | HP:0025144 | Chills or shivering                                                                                                                    | PMID:33606031 | Logue              | 2021 | Inpatient; mean of 169.0 days post discharge           | 01/16/21  | 6.30%  |
| Shivering                                                     | HP:0025144 | Chills or shivering                                                                                                                    | PMID:33606031 | Logue              | 2021 | Outpatient; mean of 169.0 days post diagnosis          | 4/161     | 2.50%  |
| Abnormal reflex                                               | HP:0031826 | Abnormal reflex status                                                                                                                 | PMID:33682276 | Rass               | 2021 | Inpatient (non-ICU); mean of 90.0 days post discharge  | 15/72     | 20.80% |
| Abnormal reflex                                               | HP:0031826 | Abnormal reflex status                                                                                                                 | PMID:33682276 | Rass               | 2021 | Inpatient (ICU); mean of 90.0 days post discharge      | 12/31/21  | 38.70% |
| Aphasia                                                       | HP:0002381 | Aphasia                                                                                                                                | PMID:33755344 | Graham             | 2021 | Outpatient; mean of 141.0 days post diagnosis          | 1/100     | 1.00%  |
| Aphasia                                                       | HP:0002381 | Aphasia                                                                                                                                | PMID:33682276 | Rass               | 2021 | Outpatient; mean of 90.0 days post diagnosis           | 0/32      | 0.00%  |
| Elevated circulating aspartate aminotransferase concentration | HP:0031956 | Aspartate transaminase (IU/L), Above reference range                                                                                   | PMID:33393696 | Garg               | 2021 | Outpatient; mean of 47.0 days post diagnosis           | 01/19/21  | 5.30%  |

SupplementalFile2

|                                                               |            |                                                                                                                                        |               |               |      |                                                        |           |        |
|---------------------------------------------------------------|------------|----------------------------------------------------------------------------------------------------------------------------------------|---------------|---------------|------|--------------------------------------------------------|-----------|--------|
| Elevated circulating aspartate aminotransferase concentration | HP:0031956 | AST >126 IU/L (>3xULN)                                                                                                                 | PMID:33490928 | Ramani        | 2021 | Inpatient; mean of 48.0 days post discharge            | 0/55      | 0.00%  |
| Babinski sign                                                 | HP:0003487 | Babinski sign                                                                                                                          | PMID:33682276 | Rass          | 2021 | Inpatient (non-ICU); mean of 90.0 days post discharge  | 1/72      | 1.40%  |
| Babinski sign                                                 | HP:0003487 | Babinski sign                                                                                                                          | PMID:33682276 | Rass          | 2021 | Inpatient (ICU); mean of 90.0 days post discharge      | 01/31/21  | 3.20%  |
| Pseudo-chilblain                                              | HP:0033696 | COVID toes (discoloration, swelling, painful, or blistering toes)                                                                      | PMID:-1       | Davis         | 2020 | Mixed; mean of 114.5 days post diagnosis               | 490/3762  | 13.00% |
| Pseudo-chilblain                                              | HP:0033696 | Red spots on toes/feet (2%)                                                                                                            | PMID:33257910 | Goertz        | 2020 | Mixed; mean of 79.0 days post diagnosis                | 42/2113   | 2.00%  |
| Flushing                                                      | HP:0031284 | Hot flushes (13%)                                                                                                                      | PMID:33257910 | Goertz        | 2020 | Mixed; mean of 79.0 days post diagnosis                | 274/2113  | 13.00% |
| Flushing                                                      | HP:0031284 | Discontinuous flushing                                                                                                                 | PMID:32979574 | Xiong         | 2021 | Inpatient; mean of 97.0 days post discharge            | 26/538    | 4.80%  |
| Pancreatitis                                                  | HP:0001733 | Pancreatic inflammation (T1 in ms) Impaired ≥803 ms                                                                                    | PMID:33785495 | Dennis        | 2021 | Inpatient; mean of 138.0 days post discharge           | 11/33     | 33.30% |
| Pancreatitis                                                  | HP:0001733 | Pancreatic inflammation (T1 in ms)                                                                                                     | PMID:33785495 | Dennis        | 2021 | Outpatient; mean of 141.0 days post diagnosis          | 17/163    | 10.40% |
| Hepatic steatosis                                             | HP:0001397 | Liver fat Impaired ≥4.8%                                                                                                               | PMID:33785495 | Dennis        | 2021 | Inpatient; mean of 138.0 days post discharge           | 13/37     | 35.10% |
| Hepatic steatosis                                             | HP:0001397 | Liver fat Impaired ≥4.8%                                                                                                               | PMID:33785495 | Dennis        | 2021 | Outpatient; mean of 141.0 days post diagnosis          | 29/163    | 17.80% |
| Polyneuropathy                                                | HP:0001271 | poly-neuropathy                                                                                                                        | PMID:33682276 | Rass          | 2021 | Outpatient; mean of 90.0 days post diagnosis           | 1/32      | 3.10%  |
| Polyneuropathy                                                | HP:0001271 | poly-neuropathy                                                                                                                        | PMID:33682276 | Rass          | 2021 | Inpatient (ICU); mean of 90.0 days post discharge      | 03/31/21  | 9.70%  |
| Hepatomegaly                                                  | HP:0002240 | Liver volume Impaired ≥1935 mL                                                                                                         | PMID:33785495 | Dennis        | 2021 | Inpatient; mean of 138.0 days post discharge           | 12/37     | 32.40% |
| Hepatomegaly                                                  | HP:0002240 | Liver volume Impaired ≥1935 mL                                                                                                         | PMID:33785495 | Dennis        | 2021 | Outpatient; mean of 141.0 days post diagnosis          | 9/163     | 5.50%  |
| Elevated circulating alanine aminotransferase concentration   | HP:0031964 | Alanine transaminase (IU/L), Above reference range                                                                                     | PMID:33393696 | Garg          | 2021 | Outpatient; mean of 47.0 days post diagnosis           | 05/19/21  | 26.30% |
| Elevated circulating alanine aminotransferase concentration   | HP:0031964 | ALT >135 IU/L (>3xULN)                                                                                                                 | PMID:33490928 | Ramani        | 2021 | Inpatient; mean of 48.0 days post discharge            | 1/58      | 1.70%  |
| Irritability                                                  | HP:0000737 | Irritability                                                                                                                           | PMID:-1       | Davis         | 2020 | Mixed; mean of 114.5 days post diagnosis               | 1924/3762 | 51.10% |
| Irritability                                                  | HP:0000737 | Irritability                                                                                                                           | PMID:33654513 | Suárez-Robles | 2020 | Inpatient; mean of 90.0 days post discharge            | 5/134     | 3.70%  |
| Short attention span                                          | HP:0000736 | Attention disorder                                                                                                                     | PMID:32853602 | Garrigues     | 2020 | Inpatient (non-ICU); mean of 110.9 days post discharge | 28/96     | 29.20% |
| Short attention span                                          | HP:0000736 | Attention disorder                                                                                                                     | PMID:32853602 | Garrigues     | 2020 | Inpatient (ICU); mean of 110.9 days post discharge     | 04/24/21  | 16.70% |
| Increased circulating NT-proBNP concentration                 | HP:0031185 | Pro-BNP increased                                                                                                                      | PMID:33450302 | Moreno-Perez  | 2021 | Mixed; mean of 77.0 days post diagnosis                | 11/276    | 4.00%  |
| Increased circulating NT-proBNP concentration                 | HP:0031185 | D-dimer, NT-proBNP, and serum ferritin were still elevated in 27%, 23%, and 17% of COVID-19 patients at second follow-up, respectively | PMID:33303539 | Sonnweber     | 2020 | Mixed; mean of 103.0 days post diagnosis               | 31/135    | 23.00% |
| Conjunctivitis                                                | HP:0000509 | Pink eye (conjunctivitis)                                                                                                              | PMID:-1       | Davis         | 2020 | Mixed; mean of 114.5 days post diagnosis               | 560/3762  | 14.90% |
| Conjunctivitis                                                | HP:0000509 | Conjunctivitis                                                                                                                         | PMID:33273028 | Stavem        | 2020 | Outpatient; mean of 117.0 days post diagnosis          | 13/451    | 2.90%  |
| Hypotonia                                                     | HP:0001252 | Decreased muscle tone                                                                                                                  | PMID:33682276 | Rass          | 2021 | Inpatient (non-ICU); mean of 90.0 days post discharge  | 0/72      | 0.00%  |
| Hypotonia                                                     | HP:0001252 | Decreased muscle tone                                                                                                                  | PMID:33682276 | Rass          | 2021 | Inpatient (ICU); mean of 90.0 days post discharge      | 01/31/21  | 3.20%  |
| Abnormal pulmonary thoracic imaging finding                   | HP:0031983 | Abnormal CXR                                                                                                                           | PMID:33731329 | Cheng         | 2021 | Mixed; mean of 63.0 days post diagnosis                | 66/113    | 58.40% |
| Abnormal pulmonary thoracic imaging finding                   | HP:0031983 | Chest X-rays score ≥2                                                                                                                  | PMID:33450302 | Moreno-Perez  | 2021 | Mixed; mean of 77.0 days post diagnosis                | 51/269    | 19.00% |
| Elevated myocardial native T1                                 | HP:4000006 | Elevated myocardial native T1                                                                                                          | PMID:32730619 | Puntmann      | 2020 | Mixed; mean of 71.0 days post diagnosis                | 73/100    | 73.00% |
| Elevated myocardial native T1                                 | HP:4000006 | Native T1 (basal myocardium) > 1197 ms (>2SD from control mean)                                                                        | PMID:33490928 | Ramani        | 2021 | Inpatient; mean of 48.0 days post discharge            | 13/50     | 26.00% |
| Exercise intolerance                                          | HP:0003546 | 50 patients (21.0%) reported that their tolerance to exercise had worsened after COVID-19.                                             | PMID:33502487 | Bellan        | 2021 | Inpatient; mean of 105.0 days post discharge           | 50/238    | 21.00% |
| Exercise intolerance                                          | HP:0003546 | When directly questioned, 50 patients (21.0%) reported that their tolerance to exercise had worsened after COVID-19                    | PMID:33502487 | Bellan        | 2021 | Inpatient; mean of 105.0 days post discharge           | 50/238    | 21.00% |
| Myocarditis                                                   | HP:0012819 | Evidence of myocarditis ≥3 segments with high T1 (≥1229 ms at 3T; ≥1015 ms at 1.5T)                                                    | PMID:33785495 | Dennis        | 2021 | Inpatient; mean of 138.0 days post discharge           | 8/37      | 21.60% |
| Myocarditis                                                   | HP:0012819 | Evidence of myocarditis ≥3 segments with high T1 (≥1229 ms at 3T; ≥1015 ms at 1.5T)                                                    | PMID:33785495 | Dennis        | 2021 | Outpatient; mean of 141.0 days post diagnosis          | 30/163    | 18.40% |
| Skeletal muscle atrophy                                       | HP:0003202 | Muscle atrophy                                                                                                                         | PMID:33682276 | Rass          | 2021 | Inpatient (non-ICU); mean of 90.0 days post discharge  | 1/72      | 1.40%  |
| Skeletal muscle atrophy                                       | HP:0003202 | Muscle atrophy                                                                                                                         | PMID:33682276 | Rass          | 2021 | Inpatient (ICU); mean of 90.0 days post discharge      | 07/31/21  | 22.60% |
| Increased circulating interleukin 6                           | HP:0030783 | mild elevations in inflammatory markers such as IL-6 (6%)                                                                              | PMID:33303539 | Sonnweber     | 2020 | Mixed; mean of 103.0 days post diagnosis               | 9/145     | 6.20%  |
| Increased circulating interleukin 6                           | HP:0030783 | increased IL-6 levels in 10/150                                                                                                        | PMID:33587810 | Townsend      | 2021 | Mixed; mean of 80.5 days post diagnosis                | 10/150    | 6.70%  |
| Rhinitis                                                      | HP:0012384 | Rhinitis                                                                                                                               | PMID:32644129 | Carfi         | 2020 | Inpatient; mean of 60.3 days post discharge            | 20/143    | 14.00% |
| Rhinitis                                                      | HP:0012384 | rhinitis                                                                                                                               | PMID:33479105 | Trinkmann     | 2021 | Mixed; mean of 68.0 days post diagnosis                | 1/246     | 0.40%  |
| Spasticity                                                    | HP:0001257 | Spasticity                                                                                                                             | PMID:33682276 | Rass          | 2021 | Inpatient (non-ICU); mean of 90.0 days post discharge  | 0/72      | 0.00%  |
| Spasticity                                                    | HP:0001257 | Spasticity                                                                                                                             | PMID:33682276 | Rass          | 2021 | Inpatient (ICU); mean of 90.0 days post discharge      | 01/31/21  | 3.20%  |
| Hemoptysis                                                    | HP:0002105 | Hemoptysis                                                                                                                             | PMID:33120193 | Daher         | 2020 | Inpatient (ICU); mean of 56.0 days post discharge      | 0/33      | 0.00%  |
| Hemoptysis                                                    | HP:0002105 | Coughing up Blood                                                                                                                      | PMID:-1       | Davis         | 2020 | Mixed; mean of 114.5 days post diagnosis               | 194/3762  | 5.20%  |
| Increased circulating lactate dehydrogenase concentration     | HP:0025435 | Lactate dehydrogenase > 250 U/L                                                                                                        | PMID:33450302 | Moreno-Perez  | 2021 | Mixed; mean of 77.0 days post diagnosis                | 27/274    | 9.90%  |
| Increased circulating lactate dehydrogenase concentration     | HP:0025435 | LDH >256                                                                                                                               | PMID:33461632 | Venturelli    | 2021 | Mixed; mean of 81.0 days post diagnosis                | 124/727   | 17.10% |

## SupplementalFile2

|                                                         |            |                                                                                                                                                                                                                                                                                                                                   |               |              |      |                                                       |           |        |
|---------------------------------------------------------|------------|-----------------------------------------------------------------------------------------------------------------------------------------------------------------------------------------------------------------------------------------------------------------------------------------------------------------------------------|---------------|--------------|------|-------------------------------------------------------|-----------|--------|
| Hepatitis                                               | HP:0012115 | Liver inflammation (cT1 in ms) Impaired ≥784 ms                                                                                                                                                                                                                                                                                   | PMID:33785495 | Dennis       | 2021 | Inpatient; mean of 138.0 days post discharge          | 9/37      | 24.30% |
| Hepatitis                                               | HP:0012115 | Liver inflammation (cT1 in ms)                                                                                                                                                                                                                                                                                                    | PMID:33785495 | Dennis       | 2021 | Outpatient; mean of 141.0 days post diagnosis         | 148/163   | 90.80% |
| Dystonia                                                | HP:0001332 | Dystonia                                                                                                                                                                                                                                                                                                                          | PMID:33682276 | Rass         | 2021 | Outpatient; mean of 90.0 days post diagnosis          | 0/32      | 0.00%  |
| Dystonia                                                | HP:0001332 | Dystonia                                                                                                                                                                                                                                                                                                                          | PMID:33682276 | Rass         | 2021 | Inpatient (non-ICU); mean of 90.0 days post discharge | 0/72      | 0.00%  |
| Hyperglycemia                                           | HP:0003074 | High blood sugar (if measured)                                                                                                                                                                                                                                                                                                    | PMID:-1       | Davis        | 2020 | Mixed; mean of 114.5 days post diagnosis              | 164/3762  | 4.40%  |
| Hyperglycemia                                           | HP:0003074 | Fasting blood sugar (mg/dl), Above reference range                                                                                                                                                                                                                                                                                | PMID:33393696 | Garg         | 2021 | Outpatient; mean of 47.0 days post diagnosis          | 04/19/21  | 21.10% |
| Decreased glomerular filtration rate                    | HP:0012213 | eGFR <90 mL/min per 1.73 m2                                                                                                                                                                                                                                                                                                       | PMID:33428867 | Huang        | 2021 | Inpatient; mean of 186.0 days post discharge          | 487/1393  | 35.00% |
| Decreased glomerular filtration rate                    | HP:0012213 | eGFR <60                                                                                                                                                                                                                                                                                                                          | PMID:33490928 | Ramani       | 2021 | Inpatient; mean of 48.0 days post discharge           | 3/58      | 5.20%  |
| Sneeze                                                  | HP:0025095 | Sneezing                                                                                                                                                                                                                                                                                                                          | PMID:-1       | Davis        | 2020 | Mixed; mean of 114.5 days post diagnosis              | 989/3762  | 26.30% |
| Sneeze                                                  | HP:0025095 | Sneezing (12%)                                                                                                                                                                                                                                                                                                                    | PMID:33257910 | Goertz       | 2020 | Mixed; mean of 79.0 days post diagnosis               | 254/2113  | 12.00% |
| Low-grade fever                                         | HP:0011134 | Elevated temperature (98.8-100.4 F)                                                                                                                                                                                                                                                                                               | PMID:-1       | Davis        | 2020 | Mixed; mean of 114.5 days post diagnosis              | 2188/3762 | 58.20% |
| Low-grade fever                                         | HP:0011134 | Low grade fever                                                                                                                                                                                                                                                                                                                   | PMID:33428867 | Huang        | 2021 | Inpatient; mean of 186.0 days post discharge          | 2/1655    | 0.10%  |
| Pericardial effusion                                    | HP:0001698 | Pericardial effusion                                                                                                                                                                                                                                                                                                              | PMID:32730619 | Puntmann     | 2020 | Mixed; mean of 71.0 days post diagnosis               | 20/100    | 20.00% |
| Pericardial effusion                                    | HP:0001698 | pericardial effusion                                                                                                                                                                                                                                                                                                              | PMID:33303539 | Sonnweber    | 2020 | Mixed; mean of 63.0 days post diagnosis               | 8/145     | 5.50%  |
| Tachypnea                                               | HP:0002789 | Tachypnoea                                                                                                                                                                                                                                                                                                                        | PMID:33052920 | De Lorenzo   | 2020 | Inpatient; mean of 21.5 days post discharge           | 33/126    | 26.20% |
| Tachypnea                                               | HP:0002789 | Tachypnoea                                                                                                                                                                                                                                                                                                                        | PMID:33052920 | De Lorenzo   | 2020 | Outpatient; mean of 26.0 days post diagnosis          | 8/59      | 13.60% |
| Angina pectoris                                         | HP:0001681 | Angina pectoris                                                                                                                                                                                                                                                                                                                   | PMID:33120193 | Daher        | 2020 | Inpatient (ICU); mean of 56.0 days post discharge     | 6/33      | 18.20% |
| Angina pectoris                                         | HP:0001681 | No patient reported typical angina symptoms                                                                                                                                                                                                                                                                                       | PMID:32730619 | Puntmann     | 2020 | Mixed; mean of 71.0 days post diagnosis               | 0/100     | 0.00%  |
| Malnutrition                                            | HP:0004395 | Malnutrition                                                                                                                                                                                                                                                                                                                      | PMID:33052920 | De Lorenzo   | 2020 | Inpatient; mean of 21.5 days post discharge           | 5/126     | 4.00%  |
| Malnutrition                                            | HP:0004395 | Malnutrition                                                                                                                                                                                                                                                                                                                      | PMID:33052920 | De Lorenzo   | 2020 | Outpatient; mean of 26.0 days post diagnosis          | 5/59      | 8.50%  |
| Increased left ventricular end-diastolic volume         | HP:0033755 | Left ventricular end diastolic volume (mL) >264 mL in Men; >206 mL in Women                                                                                                                                                                                                                                                       | PMID:33785495 | Dennis       | 2021 | Inpatient; mean of 138.0 days post discharge          | 4/37      | 10.80% |
| Increased left ventricular end-diastolic volume         | HP:0033755 | Left ventricular end diastolic volume (mL). >264 mL in Men; >206 mL in Women                                                                                                                                                                                                                                                      | PMID:33785495 | Dennis       | 2021 | Outpatient; mean of 141.0 days post diagnosis         | 4/163     | 2.50%  |
| Pancreatic steatosis                                    | HP:0033757 | Pancreatic fat Impaired ≥4.6%                                                                                                                                                                                                                                                                                                     | PMID:33785495 | Dennis       | 2021 | Inpatient; mean of 138.0 days post discharge          | 21/37     | 56.80% |
| Pancreatic steatosis                                    | HP:0033757 | Pancreatic fat Impaired ≥4.6%                                                                                                                                                                                                                                                                                                     | PMID:33785495 | Dennis       | 2021 | Outpatient; mean of 141.0 days post diagnosis         | 53/163    | 32.50% |
| Elevated circulating alkaline phosphatase concentration | HP:0003155 | Alkaline phosphatase, Above reference range                                                                                                                                                                                                                                                                                       | PMID:33393696 | Garg         | 2021 | Outpatient; mean of 47.0 days post diagnosis          | 05/19/21  | 26.30% |
| Elevated circulating alkaline phosphatase concentration | HP:0003155 | Alk Phos >260 IU/L (>2xULN)                                                                                                                                                                                                                                                                                                       | PMID:33490928 | Ramani       | 2021 | Inpatient; mean of 48.0 days post discharge           | 0/58      | 0.00%  |
| Rigidity                                                | HP:0002063 | Rigidity                                                                                                                                                                                                                                                                                                                          | PMID:33682276 | Rass         | 2021 | Inpatient (non-ICU); mean of 90.0 days post discharge | 0/72      | 0.00%  |
| Rigidity                                                | HP:0002063 | Rigidity                                                                                                                                                                                                                                                                                                                          | PMID:33682276 | Rass         | 2021 | Inpatient (ICU); mean of 90.0 days post discharge     | 03/31/21  | 9.70%  |
| Visual loss                                             | HP:0000572 | Vision loss                                                                                                                                                                                                                                                                                                                       | PMID:33564789 | Chun         | 2021 | Mixed; mean of 63.0 days post diagnosis               | 2/61      | 3.30%  |
| Visual loss                                             | HP:0000572 | Visual loss                                                                                                                                                                                                                                                                                                                       | PMID:33450302 | Moreno-Perez | 2021 | Mixed; mean of 77.0 days post diagnosis               | 15/277    | 5.40%  |
| Decreased RV/TLC ratio                                  | HP:0033773 | RV /TLC <LLN, n (%)                                                                                                                                                                                                                                                                                                               | PMID:33872135 | Abdallah     | 2021 | Inpatient; mean of 102.3 days post discharge          | 07/25/21  | 28.00% |
| Decreased RV/TLC ratio                                  | HP:0033773 | RV /TLC <LLN, n (%)                                                                                                                                                                                                                                                                                                               | PMID:33872135 | Abdallah     | 2021 | Outpatient; mean of 129.8 days post diagnosis         | 13/38     | 34.20% |
| Hypoxemia                                               | HP:0012418 | pO2 <75 mmHg – no. (%)                                                                                                                                                                                                                                                                                                            | PMID:33303539 | Sonnweber    | 2020 | Mixed; mean of 63.0 days post diagnosis               | 40/126    | 31.70% |
| Hypoxemia                                               | HP:0012418 | pO2 <75 mmHg – no. (%)                                                                                                                                                                                                                                                                                                            | PMID:33303539 | Sonnweber    | 2020 | Mixed; mean of 103.0 days post diagnosis              | 45/133    | 33.80% |
| Diminished physical functioning                         | HP:0033666 | Overall 66 patients of the study (32%) had at least one test indicating physical impairment                                                                                                                                                                                                                                       | PMID:33565741 | Baricich     | 2021 | Inpatient; mean of 124.7 days post discharge          | 66/204    | 32.40% |
| Diminished physical functioning                         | HP:0033666 | With regard to physical function, 53 patients (22.3%) were found to have limited mobility based on SPPB test results. All other patients underwent a 2-minute walk test, which revealed a subtler impairment in 75 patients (31.5%). By this method, we identified 128 patients (53.8%) with some degree of functional impairment | PMID:33502487 | Bellan       | 2021 | Inpatient; mean of 105.0 days post discharge          | 128/238   | 53.80% |
| Nasal congestion                                        | HP:0001742 | Nasal congestion                                                                                                                                                                                                                                                                                                                  | PMID:33564789 | Chun         | 2021 | Mixed; mean of 63.0 days post diagnosis               | 6/61      | 9.80%  |
| Nasal congestion                                        | HP:0001742 | Congestion                                                                                                                                                                                                                                                                                                                        | PMID:32730238 | Tenforde     | 2020 | Outpatient; mean of 17.5 days post diagnosis          | 82/274    | 29.90% |
| Splenomegaly                                            | HP:0001744 | Splenic volume (mL) Impaired ≥350 mL                                                                                                                                                                                                                                                                                              | PMID:33785495 | Dennis       | 2021 | Inpatient; mean of 138.0 days post discharge          | 4/37      | 10.80% |
| Splenomegaly                                            | HP:0001744 | Splenic volume (mL) Impaired ≥350 mL                                                                                                                                                                                                                                                                                              | PMID:33785495 | Dennis       | 2021 | Outpatient; mean of 141.0 days post diagnosis         | 3/163     | 1.80%  |
| Night sweats                                            | HP:0030166 | Night sweats                                                                                                                                                                                                                                                                                                                      | PMID:-1       | Davis        | 2020 | Mixed; mean of 114.5 days post diagnosis              | 1535/3762 | 40.80% |
| Night sweats                                            | HP:0030166 | Night sweat                                                                                                                                                                                                                                                                                                                       | PMID:33303539 | Sonnweber    | 2020 | Mixed; mean of 103.0 days post diagnosis              | 35/145    | 24.10% |
| Bowel incontinence                                      | HP:0002607 | New bowel control problem                                                                                                                                                                                                                                                                                                         | PMID:32729939 | Halpin       | 2021 | Inpatient (ICU); mean of 48.0 days post discharge     | 1/32      | 3.10%  |
| Bowel incontinence                                      | HP:0002607 | New bowel control problem                                                                                                                                                                                                                                                                                                         | PMID:32729939 | Halpin       | 2021 | Inpatient (non-ICU); mean of 48.0 days post discharge | 2/68      | 2.90%  |
| Thrombocytopenia                                        | HP:0001873 | Platelet count (x100,000/μl) below reference range                                                                                                                                                                                                                                                                                | PMID:33393696 | Garg         | 2021 | Outpatient; mean of 47.0 days post diagnosis          | 04/19/21  | 21.10% |
| Thrombocytopenia                                        | HP:0001873 | convalescent patients had no evidence of hypofibrinogenemia or thrombocytopenia during recovery.                                                                                                                                                                                                                                  | PMID:33587810 | Townsend     | 2021 | Mixed; mean of 80.5 days post diagnosis               | 0/150     | 0.00%  |
| Elevated circulating creatinine concentration           | HP:0003259 | Creatinine > 133 u mol/L                                                                                                                                                                                                                                                                                                          | PMID:33490928 | Ramani       | 2021 | Inpatient; mean of 48.0 days post discharge           | 1/58      | 1.70%  |
| Elevated circulating creatinine concentration           | HP:0003259 | Creatinine >1.1 (females),Creatinine >1.3 (males)                                                                                                                                                                                                                                                                                 | PMID:33461632 | Venturelli   | 2021 | Mixed; mean of 81.0 days post diagnosis               | 54/727    | 7.40%  |

SupplementalFile2

|                                                                |            |                                                                                                                                                                                                        |               |              |      |                                               |           |        |
|----------------------------------------------------------------|------------|--------------------------------------------------------------------------------------------------------------------------------------------------------------------------------------------------------|---------------|--------------|------|-----------------------------------------------|-----------|--------|
| Elevated circulating creatine kinase concentration             | HP:0003236 | CK > 170 U/L                                                                                                                                                                                           | PMID:33450302 | Moreno-Perez | 2021 | Mixed; mean of 77.0 days post diagnosis       | 34/276    | 12.30% |
| Postexertional malaise                                         | HP:0030973 | Post-Exertional Malaise                                                                                                                                                                                | PMID:-1       | Davis        | 2020 | Mixed; mean of 114.5 days post diagnosis      | 3350/3762 | 89.00% |
| Gaze-evoked nystagmus                                          | HP:0000640 | gaze-evoked nystagmus                                                                                                                                                                                  | PMID:33755344 | Graham       | 2021 | Outpatient; mean of 141.0 days post diagnosis | 2/100     | 2.00%  |
| Panic attack                                                   | HP:0025269 | Panic attack                                                                                                                                                                                           | PMID:33113469 | Akter        | 2020 | Inpatient; mean of 28.0 days post discharge   | 98/734    | 13.40% |
| Somatic sensory dysfunction                                    | HP:0003474 | Numbness/loss of sensation                                                                                                                                                                             | PMID:-1       | Davis        | 2020 | Mixed; mean of 114.5 days post diagnosis      | 1332/3762 | 35.40% |
| Renal insufficiency                                            | HP:0000083 | Renal failure                                                                                                                                                                                          | PMID:33680620 | Iqbal        | 2021 | Mixed; mean of 38.1 days post diagnosis       | 2/158     | 1.30%  |
| Gastroesophageal reflux                                        | HP:0002020 | Lower Esophagus Burning / gastroesophageal reflux / acid reflux                                                                                                                                        | PMID:-1       | Davis        | 2020 | Mixed; mean of 114.5 days post diagnosis      | 1317/3762 | 35.00% |
| Long term memory impairment                                    | HP:0033688 | Long-term memory loss (long-term memory can be anything from remembering yesterday, forgetting you've done a task, forgetting recently learned information, or forgetting your third-grade experience) | PMID:-1       | Davis        | 2020 | Mixed; mean of 114.5 days post diagnosis      | 1359/3762 | 36.10% |
| Anterograde memory impairment                                  | HP:0033689 | Inability to make new memories                                                                                                                                                                         | PMID:-1       | Davis        | 2020 | Mixed; mean of 114.5 days post diagnosis      | 275/3762  | 7.30%  |
| Procedural memory loss                                         | HP:0033691 | Forgetting how to do routine tasks (tying your shoe laces, washing your hands)                                                                                                                         | PMID:-1       | Davis        | 2020 | Mixed; mean of 114.5 days post diagnosis      | 453/3762  | 12.00% |
| Phantosmia                                                     | HP:0033693 | Phantom smells (imagining/hallucinating smells - smelling things that aren't there)                                                                                                                    | PMID:-1       | Davis        | 2020 | Mixed; mean of 114.5 days post diagnosis      | 872/3762  | 23.20% |
| Tactile hallucination                                          | HP:0033694 | Tactile (touch) Hallucinations                                                                                                                                                                         | PMID:-1       | Davis        | 2020 | Mixed; mean of 114.5 days post diagnosis      | 116/3762  | 3.10%  |
| Constipation                                                   | HP:0002019 | Constipation                                                                                                                                                                                           | PMID:-1       | Davis        | 2020 | Mixed; mean of 114.5 days post diagnosis      | 930/3762  | 24.70% |
| Diplopia                                                       | HP:0000651 | Double vision                                                                                                                                                                                          | PMID:-1       | Davis        | 2020 | Mixed; mean of 114.5 days post diagnosis      | 260/3762  | 6.90%  |
| Anti-thyroid peroxidase antibody positivity                    | HP:0025379 | Thyroid peroxidase Ab >60                                                                                                                                                                              | PMID:33461632 | Venturelli   | 2021 | Mixed; mean of 81.0 days post diagnosis       | 115/727   | 15.80% |
| Abnormality of movement                                        | HP:0100022 | Movement disorder                                                                                                                                                                                      | PMID:33755344 | Graham       | 2021 | Outpatient; mean of 141.0 days post diagnosis | 2/100     | 2.00%  |
| Male sexual dysfunction                                        | HP:0040307 | Sexual dysfunction - cis men/trans men                                                                                                                                                                 | PMID:-1       | Davis        | 2020 | Mixed; mean of 114.5 days post diagnosis      | 105/718   | 14.60% |
| Hypophosphatemia                                               | HP:0002148 | Phosphate, serum (mg/dl) below reference range                                                                                                                                                         | PMID:33393696 | Garg         | 2021 | Outpatient; mean of 47.0 days post diagnosis  | 01/19/21  | 5.30%  |
| Hyperkinetic movements                                         | HP:0002487 | Muscle spasms                                                                                                                                                                                          | PMID:-1       | Davis        | 2020 | Mixed; mean of 114.5 days post diagnosis      | 1222/3762 | 32.50% |
| Visual hallucinations                                          | HP:0002367 | Visual (seeing) Hallucinations                                                                                                                                                                         | PMID:-1       | Davis        | 2020 | Mixed; mean of 114.5 days post diagnosis      | 391/3762  | 10.40% |
| Neuralgia                                                      | HP:0033345 | Neuralgia (nerve pain)                                                                                                                                                                                 | PMID:-1       | Davis        | 2020 | Mixed; mean of 114.5 days post diagnosis      | 1177/3762 | 31.30% |
| Euphoria                                                       | HP:0031844 | Euphoria (a feeling or state of intense excitement and happiness)                                                                                                                                      | PMID:-1       | Davis        | 2020 | Mixed; mean of 114.5 days post diagnosis      | 188/3762  | 5.00%  |
| Hallucinations                                                 | HP:0000738 | Hallucinations, other                                                                                                                                                                                  | PMID:-1       | Davis        | 2020 | Mixed; mean of 114.5 days post diagnosis      | 87/3762   | 2.30%  |
| Irregular menstruation                                         | HP:0000858 | Abnormally irregular periods                                                                                                                                                                           | PMID:-1       | Davis        | 2020 | Mixed; mean of 114.5 days post diagnosis      | 474/1792  | 26.50% |
| Decreased circulating calcifediol concentration                | HP:0012053 | 25 hydroxy vitamin D, serum (ng/ml), Below reference range                                                                                                                                             | PMID:33393696 | Garg         | 2021 | Outpatient; mean of 47.0 days post diagnosis  | 09/19/21  | 47.40% |
| Blindness                                                      | HP:0000618 | Total loss of vision                                                                                                                                                                                   | PMID:-1       | Davis        | 2020 | Mixed; mean of 114.5 days post diagnosis      | 37/3762   | 1.00%  |
| Photophobia                                                    | HP:0000613 | Sensitivity to light                                                                                                                                                                                   | PMID:-1       | Davis        | 2020 | Mixed; mean of 114.5 days post diagnosis      | 1159/3762 | 30.80% |
| Hypoglycemia                                                   | HP:0001943 | Low blood sugar (if measured)                                                                                                                                                                          | PMID:-1       | Davis        | 2020 | Mixed; mean of 114.5 days post diagnosis      | 65/3762   | 1.70%  |
| Impaired ability to bathe oneself                              | HP:0031059 | Problems with washing/dressing self                                                                                                                                                                    | PMID:33680620 | Iqbal        | 2021 | Mixed; mean of 38.1 days post diagnosis       | 48/158    | 30.40% |
| Sleep apnea                                                    | HP:0010535 | Sleep apnea                                                                                                                                                                                            | PMID:-1       | Davis        | 2020 | Mixed; mean of 114.5 days post diagnosis      | 267/3762  | 7.10%  |
| Impulsivity                                                    | HP:0100710 | Impulsivity and Disinhibition                                                                                                                                                                          | PMID:-1       | Davis        | 2020 | Mixed; mean of 114.5 days post diagnosis      | 451/3762  | 12.00% |
| Vitreous floaters                                              | HP:0100832 | Floaters                                                                                                                                                                                               | PMID:-1       | Davis        | 2020 | Mixed; mean of 114.5 days post diagnosis      | 755/3762  | 20.10% |
| Impaired ability to dress oneself                              | HP:0031060 | Problems with washing/dressing self                                                                                                                                                                    | PMID:33680620 | Iqbal        | 2021 | Mixed; mean of 38.1 days post diagnosis       | 48/158    | 30.40% |
| Polydipsia                                                     | HP:0001959 | Extreme thirst                                                                                                                                                                                         | PMID:-1       | Davis        | 2020 | Mixed; mean of 114.5 days post diagnosis      | 1346/3762 | 35.80% |
| Hyperacusis                                                    | HP:0010780 | Sensitivity to noise                                                                                                                                                                                   | PMID:-1       | Davis        | 2020 | Mixed; mean of 114.5 days post diagnosis      | 1305/3762 | 34.70% |
| Elevated circulating thyroid-stimulating hormone concentration | HP:0002925 | Thyroid stimulating hormone (TSH, IU/L), Above reference range                                                                                                                                         | PMID:33393696 | Garg         | 2021 | Outpatient; mean of 47.0 days post diagnosis  | 02/19/21  | 10.50% |
| Recurrent fever                                                | HP:0001954 | Intermittent fever                                                                                                                                                                                     | PMID:33680620 | Iqbal        | 2021 | Mixed; mean of 38.1 days post diagnosis       | 54/158    | 34.20% |
| Pruritus                                                       | HP:0000989 | Itchy, other                                                                                                                                                                                           | PMID:-1       | Davis        | 2020 | Mixed; mean of 114.5 days post diagnosis      | 192/3762  | 5.10%  |
| Delusions                                                      | HP:0000746 | Delusions                                                                                                                                                                                              | PMID:-1       | Davis        | 2020 | Mixed; mean of 114.5 days post diagnosis      | 112/3762  | 3.00%  |
| Apathy                                                         | HP:0000741 | Apathy (lack of feeling, emotion, interest, or concern)                                                                                                                                                | PMID:-1       | Davis        | 2020 | Mixed; mean of 114.5 days post diagnosis      | 1473/3762 | 39.20% |
| Attention deficit hyperactivity disorder                       | HP:0007018 | Attention deficit                                                                                                                                                                                      | PMID:33755344 | Graham       | 2021 | Outpatient; mean of 141.0 days post diagnosis | 27/100    | 27.00% |
| Pleuritis                                                      | HP:0002102 | Pain/burning feeling in lungs (24%)                                                                                                                                                                    | PMID:33257910 | Goertz       | 2020 | Mixed; mean of 79.0 days post diagnosis       | 507/2113  | 24.00% |
| Increased heart rate variability                               | HP:0031862 | Self-reported rapid variations of heart rate (HR) (24)                                                                                                                                                 | PMID:33755344 | Graham       | 2021 | Outpatient; mean of 141.0 days post diagnosis | 24/100    | 24.00% |
| Dermatographic urticaria                                       | HP:0011971 | Dermatographia (writing on your skin causes red lines where you scratched)                                                                                                                             | PMID:-1       | Davis        | 2020 | Mixed; mean of 114.5 days post diagnosis      | 288/3762  | 7.70%  |
| Agnosia                                                        | HP:0010524 | Agnosia (failure to recognize or identify objects despite intact sensory functioning)                                                                                                                  | PMID:-1       | Davis        | 2020 | Mixed; mean of 114.5 days post diagnosis      | 345/3762  | 9.20%  |
| Pericardial late gadolinium enhancement                        | HP:4000005 | Pericardial late gadolinium enhancement                                                                                                                                                                | PMID:32730619 | Puntmann     | 2020 | Mixed; mean of 71.0 days post diagnosis       | 22/100    | 22.00% |
| Fragile nails                                                  | HP:0001808 | Brittle/discolored nail                                                                                                                                                                                | PMID:-1       | Davis        | 2020 | Mixed; mean of 114.5 days post diagnosis      | 358/3762  | 9.50%  |
| Elevated myocardial native T2                                  | HP:4000003 | Elevated myocardial native T2                                                                                                                                                                          | PMID:32730619 | Puntmann     | 2020 | Mixed; mean of 71.0 days post diagnosis       | 60/100    | 60.00% |
| Myocardial late gadolinium enhancement                         | HP:4000004 | Myocardial late gadolinium enhancement                                                                                                                                                                 | PMID:32730619 | Puntmann     | 2020 | Mixed; mean of 71.0 days post diagnosis       | 32/100    | 32.00% |
| Aggressive behavior                                            | HP:0000718 | Aggression                                                                                                                                                                                             | PMID:-1       | Davis        | 2020 | Mixed; mean of 114.5 days post diagnosis      | 280/3762  | 7.40%  |
| Emotional lability                                             | HP:0000712 | Mood Lability                                                                                                                                                                                          | PMID:-1       | Davis        | 2020 | Mixed; mean of 114.5 days post diagnosis      | 1743/3762 | 46.30% |

## SupplementalFile2

|                                                   |            |                                                                                                                                                             |               |               |      |                                                       |           |        |
|---------------------------------------------------|------------|-------------------------------------------------------------------------------------------------------------------------------------------------------------|---------------|---------------|------|-------------------------------------------------------|-----------|--------|
| Temperature instability                           | HP:0005968 | Temperature lability                                                                                                                                        | PMID:-1       | Davis         | 2020 | Mixed; mean of 114.5 days post diagnosis              | 1539/3762 | 40.90% |
| Gastroparesis                                     | HP:0002578 | gastroparesis                                                                                                                                               | PMID:33755344 | Graham        | 2021 | Outpatient; mean of 141.0 days post diagnosis         | 2/100     | 2.00%  |
| Arthritis                                         | HP:0001369 | Arthritis                                                                                                                                                   | PMID:33654513 | Suárez-Robles | 2020 | Inpatient; mean of 90.0 days post discharge           | 33/134    | 24.60% |
| Elevated erythrocyte sedimentation rate           | HP:0003565 | Erythrocyte sedimentation rate abnormal                                                                                                                     | PMID:33755344 | Graham        | 2021 | Outpatient; mean of 141.0 days post diagnosis         | 8/47      | 17.00% |
| Anomic aphasia                                    | HP:0030784 | Difficulty finding the right words while speaking/writing                                                                                                   | PMID:-1       | Davis         | 2020 | Mixed; mean of 114.5 days post diagnosis              | 1743/3762 | 46.30% |
| Gastric ulcer                                     | HP:0002592 | Ulcer                                                                                                                                                       | PMID:33306721 | Jacobs        | 2020 | Inpatient (non-ICU); mean of 35.0 days post discharge | 2/183     | 1.10%  |
| Edema                                             | HP:0000969 | Limb oedema                                                                                                                                                 | PMID:32979574 | Xiong         | 2021 | Inpatient; mean of 97.0 days post discharge           | 14/538    | 2.60%  |
| Petechiae                                         | HP:0000967 | Petechiae (tiny purple, red, or brown spots on the skin, usually on arms, legs, stomach, buttocks, and occasionally inside mouth or on eyelids)             | PMID:-1       | Davis         | 2020 | Mixed; mean of 114.5 days post diagnosis              | 671/3762  | 17.80% |
| Hypocalcemia                                      | HP:0002901 | Calcium, serum (mg/dl) below reference range                                                                                                                | PMID:33393696 | Garg          | 2021 | Outpatient; mean of 47.0 days post diagnosis          | 05/19/21  | 26.30% |
| Tearfulness                                       | HP:0033705 | Tearfulness                                                                                                                                                 | PMID:-1       | Davis         | 2020 | Mixed; mean of 114.5 days post diagnosis              | 1599/3762 | 42.50% |
| Slurred speech                                    | HP:0001350 | Slurring words/speech                                                                                                                                       | PMID:-1       | Davis         | 2020 | Mixed; mean of 114.5 days post diagnosis              | 594/3762  | 15.80% |
| Subpleural curvilinear line                       | HP:0033702 | Subpleural lines                                                                                                                                            | PMID:32692945 | Liu           | 2020 | Inpatient; mean of 28.0 days post discharge           | 4/51      | 7.80%  |
| Diabetes mellitus                                 | HP:0000819 | Diabetes                                                                                                                                                    | PMID:33680620 | Iqbal         | 2021 | Mixed; mean of 38.1 days post diagnosis               | 1/158     | 0.60%  |
| Limb pain                                         | HP:0009763 | limb pain                                                                                                                                                   | PMID:33479105 | Trinkmann     | 2021 | Mixed; mean of 68.0 days post diagnosis               | 2/246     | 0.80%  |
| Facial paralysis                                  | HP:0007209 | Facial paralysis (please indicate where on face was paralyzed)                                                                                              | PMID:-1       | Davis         | 2020 | Mixed; mean of 114.5 days post diagnosis              | 127/3762  | 3.40%  |
| Testicular pain                                   | HP:0033839 | Pain in testicles                                                                                                                                           | PMID:-1       | Davis         | 2020 | Mixed; mean of 114.5 days post diagnosis              | 80/777    | 10.30% |
| Dysphoria                                         | HP:0033838 | Dysphoria                                                                                                                                                   | PMID:32979574 | Xiong         | 2021 | Inpatient; mean of 97.0 days post discharge           | 9/538     | 1.70%  |
| Anti-thyroglobulin antibody positivity            | HP:0032069 | Anti-Thyroglobulin Ab >60                                                                                                                                   | PMID:33461632 | Venturelli    | 2021 | Mixed; mean of 81.0 days post diagnosis               | 61/727    | 8.40%  |
| Rest dyspnea                                      | HP:0033710 | Nonmotor polypnoea                                                                                                                                          | PMID:32979574 | Xiong         | 2021 | Inpatient; mean of 97.0 days post discharge           | 25/538    | 4.60%  |
| Elevated circulating soluble CD25 concentration   | HP:0033833 | increased sCD25 in only 6/150                                                                                                                               | PMID:33587810 | Townsend      | 2021 | Mixed; mean of 80.5 days post diagnosis               | 6/150     | 4.00%  |
| Pulmonary interstitial thickening                 | HP:0033711 | Interstitial thickening                                                                                                                                     | PMID:32838236 | Zhao          | 2020 | Inpatient; mean of 78.5 days post discharge           | 15/55     | 27.30% |
| Malaise                                           | HP:0033834 | General malaise                                                                                                                                             | PMID:33654513 | Suárez-Robles | 2020 | Inpatient; mean of 90.0 days post diagnosis           | 25/134    | 18.70% |
| Pulmonary embolism                                | HP:0002204 | Pulmonary embolism                                                                                                                                          | PMID:33479105 | Trinkmann     | 2021 | Mixed; mean of 68.0 days post discharge               | 02/17/21  | 11.80% |
| Receptive aphasia                                 | HP:0033848 | Difficulty processing/understanding what others say                                                                                                         | PMID:-1       | Davis         | 2020 | Mixed; mean of 114.5 days post diagnosis              | 894/3762  | 23.80% |
| Phantageusia                                      | HP:0033847 | Phantom taste (imagining/hallucinating tastes- tasting things when there's nothing in your mouth)                                                           | PMID:-1       | Davis         | 2020 | Mixed; mean of 114.5 days post diagnosis              | 339/3762  | 9.00%  |
| Bilingual aphasia                                 | HP:0033849 | Changes to non-primary (second/third) language skills                                                                                                       | PMID:-1       | Davis         | 2020 | Mixed; mean of 114.5 days post diagnosis              | 191/662   | 28.90% |
| Solid pulmonary nodule                            | HP:0033609 | Chest CT scan Solid nodule                                                                                                                                  | PMID:33676998 | González      | 2021 | Inpatient (ICU); mean of 90.0 days post discharge     | 22/57     | 38.60% |
| Postmenopausal bleeding                           | HP:0033840 | Post-Menopausal bleeding/spotting                                                                                                                           | PMID:-1       | Davis         | 2020 | Mixed; mean of 114.5 days post diagnosis              | 63/2061   | 3.10%  |
| Body ache                                         | HP:0033047 | Body aches                                                                                                                                                  | PMID:32730238 | Tenforde      | 2020 | Outpatient; mean of 17.5 days post diagnosis          | 47/274    | 17.20% |
| Early satiety                                     | HP:0033842 | Feeling full quickly when eating                                                                                                                            | PMID:-1       | Davis         | 2020 | Mixed; mean of 114.5 days post diagnosis              | 1158/3762 | 30.80% |
| Ocular pruritus                                   | HP:0033841 | Itchy eyes                                                                                                                                                  | PMID:-1       | Davis         | 2020 | Mixed; mean of 114.5 days post diagnosis              | 909/3762  | 24.20% |
| Tachyphrenia                                      | HP:0033844 | Thoughts moving too quickly                                                                                                                                 | PMID:-1       | Davis         | 2020 | Mixed; mean of 114.5 days post diagnosis              | 570/3762  | 15.20% |
| Sense of impending doom                           | HP:0033845 |                                                                                                                                                             | PMID:-1       | Davis         | 2020 | Mixed; mean of 114.5 days post diagnosis              | 1269/3762 | 33.70% |
| Impaired executive functioning                    | HP:0033051 | Difficulty with executive functioning (planning, organizing, figuring out the sequence of actions, abstracting)                                             | PMID:-1       | Davis         | 2020 | Mixed; mean of 114.5 days post diagnosis              | 2166/3762 | 57.60% |
| Ocular pain                                       | HP:0200026 | Eye pressure or pain                                                                                                                                        | PMID:-1       | Davis         | 2020 | Mixed; mean of 114.5 days post diagnosis              | 992/3762  | 26.40% |
| Menorrhagia                                       | HP:0000132 | Abnormally heavy periods/clotting                                                                                                                           | PMID:-1       | Davis         | 2020 | Mixed; mean of 114.5 days post diagnosis              | 355/1762  | 20.10% |
| Coldness                                          | HP:0033850 | Coldness                                                                                                                                                    | PMID:-1       | Davis         | 2020 | Mixed; mean of 114.5 days post diagnosis              | 1261/3762 | 33.50% |
| Subsolid pulmonary nodule                         | HP:0033610 | Chest CT scan Nonsolid nodule                                                                                                                               | PMID:33676998 | González      | 2021 | Inpatient (ICU); mean of 90.0 days post discharge     | 2/57      | 3.50%  |
| Auditory hallucinations                           | HP:0008765 | Auditory (hearing) Hallucinations                                                                                                                           | PMID:-1       | Davis         | 2020 | Mixed; mean of 114.5 days post diagnosis              | 244/3762  | 6.50%  |
| Expressive aphasia                                | HP:0002427 | Difficulting speaking in complete sentences                                                                                                                 | PMID:-1       | Davis         | 2020 | Mixed; mean of 114.5 days post diagnosis              | 835/3762  | 22.20% |
| Hand muscle weakness                              | HP:0030237 | Focal motor deficit Hand weakness lasting days to weeks—right-sided (3), left-sided (1).                                                                    | PMID:33755344 | Graham        | 2021 | Outpatient; mean of 141.0 days post diagnosis         | 4/100     | 4.00%  |
| Pulsatile tinnitus                                | HP:0008629 | Tinnitus                                                                                                                                                    | PMID:33680620 | Iqbal         | 2021 | Mixed; mean of 38.1 days post diagnosis               | 30/158    | 19.00% |
| Dysmetria                                         | HP:0001310 | Dysmetria                                                                                                                                                   | PMID:33682276 | Rass          | 2021 | Inpatient (non-ICU); mean of 90.0 days post discharge | 2/72      | 2.80%  |
| Intrascapular pain                                | HP:0033746 | Pain between shoulder blades (33%)                                                                                                                          | PMID:33257910 | Goertz        | 2020 | Mixed; mean of 79.0 days post diagnosis               | 697/2113  | 33.00% |
| Restless legs                                     | HP:0012452 | Restless leg syndrome                                                                                                                                       | PMID:-1       | Davis         | 2020 | Mixed; mean of 114.5 days post diagnosis              | 668/3762  | 17.80% |
| Reduced functional residual capacity              | HP:0033750 | FRC <80%, % of predicted                                                                                                                                    | PMID:33428867 | Huang         | 2021 | Inpatient; mean of 186.0 days post discharge          | 27/332    | 8.10%  |
| Xerostomia                                        | HP:0000217 | Sicca syndrome                                                                                                                                              | PMID:32644129 | Carfi         | 2020 | Inpatient; mean of 60.3 days post discharge           | 21/143    | 14.70% |
| Venous thrombosis                                 | HP:0004936 | Blood clots (Thrombosis)                                                                                                                                    | PMID:-1       | Davis         | 2020 | Mixed; mean of 114.5 days post diagnosis              | 131/3762  | 3.50%  |
| Bone pain                                         | HP:0002653 | Bone ache or burning                                                                                                                                        | PMID:-1       | Davis         | 2020 | Mixed; mean of 114.5 days post diagnosis              | 910/3762  | 24.20% |
| Increased circulating procalcitonin concentration | HP:0032308 | mild elevations in inflammatory markers such as PCT (9%) w convalescent patients had no evidence of hypofibrinogenemia or thrombocytopenia during recovery. | PMID:33303539 | Sonnweber     | 2020 | Mixed; mean of 103.0 days post diagnosis              | 13/145    | 9.00%  |
| Hypofibrinogenemia                                | HP:0011900 |                                                                                                                                                             | PMID:33587810 | Townsend      | 2021 | Mixed; mean of 80.5 days post diagnosis               | 0/150     | 0.00%  |
| Unilateral facial palsy                           | HP:0012799 | facial droop                                                                                                                                                | PMID:33755344 | Graham        | 2021 | Outpatient; mean of 141.0 days post diagnosis         | 1/100     | 1.00%  |
| Female sexual dysfunction                         | HP:0030014 | Sexual dysfunction - cis women/trans women                                                                                                                  | PMID:-1       | Davis         | 2020 | Mixed; mean of 114.5 days post diagnosis              | 237/2965  | 8.00%  |
| Muscle spasm                                      | HP:0003394 | Muscle spasms                                                                                                                                               | PMID:-1       | Davis         | 2020 | Mixed; mean of 114.5 days post diagnosis              | 1222/3762 | 32.50% |

## SupplementalFile2

|                                                           |            |                                                                                                                                                                                             |               |                  |      |                                                   |           |        |
|-----------------------------------------------------------|------------|---------------------------------------------------------------------------------------------------------------------------------------------------------------------------------------------|---------------|------------------|------|---------------------------------------------------|-----------|--------|
| Keratoconjunctivitis sicca                                | HP:0001097 | Dry eyes                                                                                                                                                                                    | PMID:-1       | Davis            | 2020 | Mixed; mean of 114.5 days post diagnosis          | 1077/3762 | 28.60% |
| Centriobular ground-glass opacification on pulmonary HRCT | HP:0025180 | ground glass opacities                                                                                                                                                                      | PMID:33479105 | Trinkmann        | 2021 | Mixed; mean of 68.0 days post diagnosis           | 11/17/21  | 64.70% |
| Phonophobia                                               | HP:0002183 | Sensitivity to noise                                                                                                                                                                        | PMID:-1       | Davis            | 2020 | Mixed; mean of 114.5 days post diagnosis          | 1305/3762 | 34.70% |
| Hyperesthesia                                             | HP:0100963 | Hyperaesthesia                                                                                                                                                                              | PMID:33205450 | Ludvigsson       | 2021 | Outpatient; mean of 210.0 days post diagnosis     | 02/05/21  | 40.00% |
| Anaphylactic shock                                        | HP:0100845 | New/unexpected anaphylaxis reaction                                                                                                                                                         | PMID:-1       | Davis            | 2020 | Mixed; mean of 114.5 days post diagnosis          | 153/3762  | 4.10%  |
| Pleuritic chest pain                                      | HP:0033771 | Pleuritic pain                                                                                                                                                                              | PMID:33865161 | Ordinola Navarro | 2021 | Mixed; mean of 40.0 days post diagnosis           | 14/115    | 12.20% |
| Hypotension                                               | HP:0002615 | Abnormally low blood pressure                                                                                                                                                               | PMID:-1       | Davis            | 2020 | Mixed; mean of 114.5 days post diagnosis          | 443/3762  | 11.80% |
| Bradycardia                                               | HP:0001662 | Bradycardia (low heart rate, <60 beats per minute)                                                                                                                                          | PMID:-1       | Davis            | 2020 | Mixed; mean of 114.5 days post diagnosis          | 658/3762  | 17.50% |
| Migraine                                                  | HP:0002076 | Migraines                                                                                                                                                                                   | PMID:-1       | Davis            | 2020 | Mixed; mean of 114.5 days post diagnosis          | 872/3762  | 23.20% |
| Sleep onset insomnia                                      | HP:0031354 | Difficulty falling asleep                                                                                                                                                                   | PMID:-1       | Davis            | 2020 | Mixed; mean of 114.5 days post diagnosis          | 1489/3762 | 39.60% |
| Maintenance insomnia                                      | HP:0031355 | Waking up several times during the night                                                                                                                                                    | PMID:-1       | Davis            | 2020 | Mixed; mean of 114.5 days post diagnosis          | 1791/3762 | 47.60% |
| Elevated gamma-glutamyltransferase level                  | HP:0030948 | GGT >80 IU/L (>2xULN)                                                                                                                                                                       | PMID:33490928 | Ramani           | 2021 | Inpatient; mean of 48.0 days post discharge       | 6/54      | 11.10% |
| Terminal insomnia                                         | HP:0031356 | Waking up early in the morning                                                                                                                                                              | PMID:-1       | Davis            | 2020 | Mixed; mean of 114.5 days post diagnosis          | 936/3762  | 24.90% |
| Crazy-paving pattern                                      | HP:0033659 | Crazy paving                                                                                                                                                                                | PMID:32838236 | Zhao             | 2020 | Inpatient; mean of 78.5 days post discharge       | 3/55      | 5.50%  |
| Scaling skin                                              | HP:0040189 | Peeling skin                                                                                                                                                                                | PMID:-1       | Davis            | 2020 | Mixed; mean of 114.5 days post diagnosis          | 488/3762  | 13.00% |
| Peripheral visual field loss                              | HP:0007994 | Tunnel vision                                                                                                                                                                               | PMID:-1       | Davis            | 2020 | Mixed; mean of 114.5 days post diagnosis          | 125/3762  | 3.30%  |
| Rhonchi                                                   | HP:0030831 | Rattling of breath                                                                                                                                                                          | PMID:-1       | Davis            | 2020 | Mixed; mean of 114.5 days post diagnosis          | 641/3762  | 17.00% |
| Hypothermia                                               | HP:0002045 | Low temperature                                                                                                                                                                             | PMID:-1       | Davis            | 2020 | Mixed; mean of 114.5 days post diagnosis          | 776/3762  | 20.60% |
| Heat intolerance                                          | HP:0002046 | Heat intolerance                                                                                                                                                                            | PMID:-1       | Davis            | 2020 | Mixed; mean of 114.5 days post diagnosis          | 1024/3762 | 27.20% |
| Antinuclear antibody positivity                           | HP:0003493 | Antinuclear antibody $\geq$ 1:160                                                                                                                                                           | PMID:33755344 | Graham           | 2021 | Outpatient; mean of 141.0 days post diagnosis     | 11/33     | 33.30% |
| Increased circulating troponin T concentration            | HP:0410174 | Troponin T, > 14 ng/L                                                                                                                                                                       | PMID:33450302 | Moreno-Perez     | 2021 | Mixed; mean of 77.0 days post diagnosis           | 40/275    | 14.50% |
| Increased circulating troponin I concentration            | HP:0410173 | High-sensitivity troponin T values were detectable (3 pg/mL or greater) in 71 patients recently recovered from COVID-19 (71%) and significantly elevated (13.9 pg/mL or greater) in 5 (5%). | PMID:32730619 | Puntmann         | 2020 | Mixed; mean of 71.0 days post diagnosis           | 5/100     | 5.00%  |
| Atelectasis                                               | HP:0100750 | Chest CT Scan Atelectasis                                                                                                                                                                   | PMID:33676998 | González         | 2021 | Inpatient (ICU); mean of 90.0 days post discharge | 14/57     | 24.60% |
| Diminished mental health                                  | HP:0033667 | Emotionally affected at least mildly by health conditions                                                                                                                                   | PMID:33175566 | Chopra           | 2020 | Inpatient; mean of 60.0 days post discharge       | 238/488   | 48.80% |
| Lymphadenopathy                                           | HP:0002716 | Enlarged lymph nodes                                                                                                                                                                        | PMID:33273028 | Stavem           | 2020 | Outpatient; mean of 117.0 days post diagnosis     | 5/451     | 1.10%  |
| Airway obstruction                                        | HP:0006536 | four (15.38%) had obstruction, - one (3.85%) had mixed obstruction and restriction                                                                                                          | PMID:32835708 | Ramani           | 2021 | Inpatient (ICU); mean of 39.5 days post discharge | 05/28/21  | 17.90% |
| Mania                                                     | HP:0100754 | Mania (abnormally elevated/excited mood, decreased need for sleep, occasionally with delusions)                                                                                             | PMID:-1       | Davis            | 2020 | Mixed; mean of 114.5 days post diagnosis          | 96/3762   | 2.60%  |
